# Supplementary material for: Iron-catalysed quinoline synthesis via acceptorless dehydrogenative coupling
Source: Royal Society of Chemistry journal article supplement (doi:10.1039/d2qo01386j), 2022-01-01
Supplement: d2qo01386j1.pdf [file d2qo01386j1.pdf]

## Supporting Information

### Iron-Catalyzed Quinoline Synthesis *via* Acceptorless Dehydrogenative Coupling

Ke Yu, Qianjin Chen\* and Weiping Liu\*

Key Lab of Science and Technology of Eco-Textile, Ministry of Education, College of Chemistry and Chemical Engineering, Donghua University, Shanghai, 201620, P. R. China.

|                                                           |    |
|-----------------------------------------------------------|----|
| General.....                                              | 2  |
| General Procedure for the Synthesis of Quinolines.....    | 3  |
| Characterization data for products.....                   | 4  |
| Copies of <sup>1</sup> H and <sup>13</sup> C Spectra..... | 24 |
| References.....                                           | 66 |

## General

All solvents were dried and degassed, which were kept in the glove box. And all catalytic reactions were carried out in oven dried schlenk sealed pressure tube under Ar atmosphere. Chemicals were obtained from commercial sources and were used without further purification. The PNP-Iron catalysts were prepared according to the previous report.<sup>1</sup> The GC yields were determined by GC-FID, Agilent 8860 Network with FID detector, using *n*-hexadecane as an internal standard. Chemical shifts ( $\delta$ ) are reported in ppm downfield of tetramethylsilane. The residual solvent signals were used as references for <sup>1</sup>H and <sup>13</sup>C NMR spectra (CDCl<sub>3</sub>:  $\delta$ H = 7.26 ppm,  $\delta$ C = 77.1 ppm). <sup>19</sup>F NMR spectra are not calibrated by an internal reference. Data for <sup>1</sup>H NMR spectra were reported as follows: chemical shift (ppm), peak shape (s = singlet, d = doublet, t = triplet, q = quartet, m = multiplet, dd = doublet of doublets, vt = virtual triplet), coupling constant (Hz), and integration. Data for <sup>13</sup>C NMR were reported in terms of chemical shift (ppm).

## General Procedure for the Synthesis of Quinolines

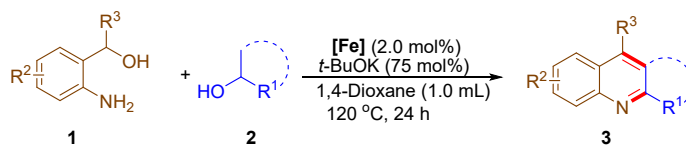

In glovebox, an oven-dried Schlenk pressure tube (25 mL) containing a stirring bar was sequentially charged with [Fe] (2.0 mol%), KO*t*-Bu (75 mol%) and 1,4-dioxane (0.5 mL), stirring for 10 minutes. Afterwards, 2-aminobenzyl alcohol (0.5 mmol), secondary alcohols (1.5 mmol), and another 0.5 mL 1,4-dioxane were added. The reaction tube was capped and brought out of the glovebox. It was then placed into an oil-bath and heated at 120 °C for 24 h. After cooling to room temperature, the reaction mixture was transferred to round flask by DCM, the solvent was removed under *vacuum*. The residue was purified by column chromatography using petroleum ether /ethyl acetate as an eluent to afford pure products.

## Characterization data for products

### 2-Phenylquinoline (3aa)

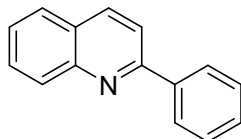

The procedure was followed using [Fe] (2.0 mol%, 6.3 mg), KO*t*-Bu (75 mol%, 42 mg), **1a** (62 mg, 0.5 mmol) and 1-phenylethan-1-ol (180  $\mu$ L, 1.5 mmol) under 120  $^{\circ}$ C for 24 h. Purification by column chromatography of silica gel (Petroleum ether/Ethyl acetate: 15:1), yielded **3aa** (88%, 90 mg) as white solid.  $^1\text{H}$  NMR (400 MHz,  $\text{CDCl}_3$ )  $\delta$  = 8.19–8.14 (m, 4H), 7.87 (d,  $J$  = 8.6 Hz, 1H), 7.83 (dd,  $J$  = 8.1, 1.4 Hz, 1H), 7.77–7.69 (m, 1H), 7.57–7.44 (m, 4H).  $^{13}\text{C}$  NMR (100 MHz,  $\text{CDCl}_3$ )  $\delta$  = 157.4, 148.3, 139.7, 136.8, 129.8, 129.7, 129.4, 128.9, 127.6, 127.5, 127.2, 126.3, 119.1.

The spectral data are in accordance with those reported in the literature.<sup>2</sup>

### 2-(4-Methylphenyl)quinoline (3ab)

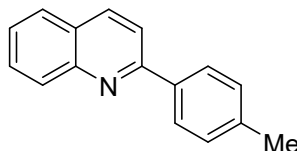

The procedure was followed using [Fe] (2.0 mol%, 6.3 mg), KO*t*-Bu (75 mol%, 42 mg), **1a** (62 mg, 0.5 mmol) and 1-(*p*-tolyl)ethan-1-ol (207  $\mu$ L, 1.5 mmol) under 120  $^{\circ}$ C for 24 h. Purification by column chromatography of silica gel (Petroleum ether/Ethyl acetate: 15:1), yielded **3ab** (80%, 94 mg) as yellow solid.  $^1\text{H}$  NMR (400 MHz,  $\text{CDCl}_3$ )  $\delta$  = 8.20 (d,  $J$  = 8.6 Hz, 1H), 8.16 (d,  $J$  = 8.5 Hz, 1H), 8.07 (d,  $J$  = 8.2 Hz, 2H), 7.86 (d,  $J$  = 8.6 Hz, 1H), 7.82 (dd,  $J$  = 8.2 Hz, 1.3 Hz, 1H), 7.74–7.69 (m, 1H), 7.53–7.49 (m, 1H), 7.33 (d,  $J$  = 7.9 Hz, 2H), 2.44 (s, 3H).  $^{13}\text{C}$  NMR (100 MHz,  $\text{CDCl}_3$ )  $\delta$  = 157.3, 148.3, 139.4, 136.9, 136.7, 129.7, 129.6 (2C), 127.5 (2C), 127.1, 126.1, 118.9, 21.4.

The spectral data are in accordance with those reported in the literature.<sup>2</sup>

### 2-(4-Methoxyphenyl)quinoline (3ac)

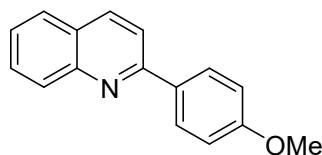

The procedure was followed using [Fe] (2.0 mol%, 6.3 mg), KO*t*-Bu (75 mol%, 42 mg), **1a** (62 mg, 0.5 mmol) and 1-(4-methoxyphenyl)ethan-1-ol (212  $\mu$ L, 1.5 mmol) under 120 °C for 24 h. Purification by column chromatography of silica gel (Petroleum ether/Ethyl acetate: 15:1), yielded **3ac** (81%, 95 mg) as white solid. <sup>1</sup>H NMR (400 MHz, CDCl<sub>3</sub>)  $\delta$  = 8.19 (d, *J* = 8.6 Hz, 1H), 8.17–8.11 (m, 3H), 7.84 (d, *J* = 8.6 Hz, 1H), 7.80 (d, *J* = 8.4 Hz, 1H), 7.73–7.69 (m, 1H), 7.53–7.47 (m, 1H), 7.08–7.02 (m, 2H), 3.89 (s, 3H). <sup>13</sup>C NMR (100 MHz, CDCl<sub>3</sub>)  $\delta$  = 160.8, 156.9, 148.3, 136.7, 132.3, 129.6, 129.5, 128.9, 127.5, 126.9, 125.9, 118.6, 114.2, 55.4.

The spectral data are in accordance with those reported in the literature.<sup>2</sup>

### *N,N*-Dimethyl-4-(quinolin-2-yl)aniline (3ad)

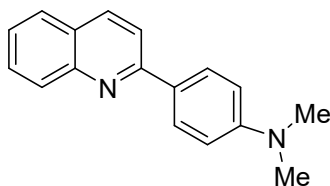

The procedure was followed using [Fe] (2.0 mol%, 6.3 mg), KO*t*-Bu (75 mol%, 42 mg), **1a** (62 mg, 0.5 mmol) and 1-(4-(dimethylamino)phenyl)ethan-1-ol (248 mg, 1.5 mmol) under 120 °C for 24 h. Purification by column chromatography of silica gel (Petroleum ether/Ethyl acetate: 10:1), yielded **3ad** (83%, 103 mg) as yellow solid. <sup>1</sup>H NMR (400 MHz, CDCl<sub>3</sub>)  $\delta$  = 8.14–8.10 (m, 4H), 7.83 (d, *J* = 8.7 Hz, 1H), 7.76 (d, *J* = 8.3 Hz, 1H), 7.71–7.64 (m, 1H), 7.47–7.43 (m, 1H), 6.87–6.80 (m, 2H), 3.05 (s, 6H). <sup>13</sup>C NMR (100 MHz, CDCl<sub>3</sub>)  $\delta$  = 157.4, 151.4, 148.4, 136.3, 129.4, 129.3, 128.5, 127.4, 127.4, 126.7, 125.4, 118.3, 112.3, 40.4.

The spectral data are in accordance with those reported in the literature.<sup>2</sup>

### 2-(4-(Methylthio)phenyl)quinoline (3ae)

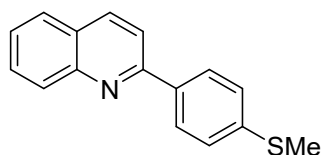

The procedure was followed using [Fe] (2.0 mol%, 6.3 mg), KO*t*-Bu (75 mol%, 42 mg), **1a** (62 mg, 0.5 mmol) and 1-(4-(methylthio)phenyl)ethan-1-ol (252 mg, 1.5 mmol) under 120 °C for 24 h. Purification by column chromatography of silica gel (Petroleum ether/Ethyl acetate: 15:1), yielded **3ae** (88%, 111 mg) as yellow solid. <sup>1</sup>H NMR (400 MHz, CDCl<sub>3</sub>) δ = 8.22–8.08 (m, 4H), 7.86–7.78 (m, 2H), 7.74–7.71 (m, 1H), 7.55–7.49 (m, 1H), 7.39 (d, *J* = 8.5 Hz, 2H), 2.54 (s, 3H). <sup>13</sup>C NMR (100 MHz, CDCl<sub>3</sub>) δ = 156.6, 148.3, 140.4, 136.8, 136.3, 129.7, 129.6, 127.8, 127.5, 127.1, 126.4, 126.2, 118.6, 15.6.

The spectral data are in accordance with those reported in the literature.<sup>3</sup>

### 2-(4-(*tert*-Butyl) phenyl)quinoline (3af)

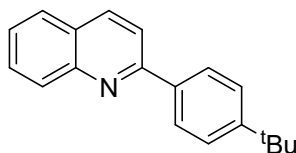

The procedure was followed using [Fe] (2.0 mol%, 6.3 mg), KO*t*-Bu (75 mol%, 42 mg), 2-aminobenzyl alcohol (62 mg, 0.5 mmol) and 1-(4-(*tert*-butyl)phenyl)ethan-1-ol (267 mg, 1.5 mmol) under 120 °C for 24 h. Purification by column chromatography of silica gel (Petroleum ether/Ethyl acetate: 15:1), yielded **3af** (86%, 112 mg) as white solid. <sup>1</sup>H NMR (400 MHz, CDCl<sub>3</sub>) δ = 8.19 (d, *J* = 8.5 Hz, 2H), 8.12 (d, *J* = 8.3 Hz, 2H), 7.87 (d, *J* = 8.5 Hz, 1H), 7.83–7.79 (m, 1H), 7.75–7.68 (m, 1H), 7.58–7.56 (m, 2H), 7.54–7.50 (m, 1H), 1.40 (s, 9H). <sup>13</sup>C NMR (100 MHz, CDCl<sub>3</sub>) δ = 157.4, 152.6, 148.3, 137.0, 136.7, 129.7, 129.6, 127.5, 127.3, 127.1, 126.1, 125.9, 119.0, 34.8, 31.4.

The spectral data are in accordance with those reported in the literature.<sup>4</sup>

### 2-([1,1'-Biphenyl]-4-yl)quinoline (3ag)

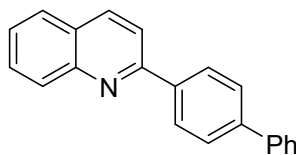

The procedure was followed using [Fe] (2.0 mol%, 6.3 mg), KO*t*-Bu (75 mol%, 42 mg), **1a** (62 mg, 0.5 mmol) and 1-([1,1'-biphenyl]-4-yl)ethan-1-ol (297 mg, 1.5 mmol) under 120 °C for 24 h. Purification by column chromatography of silica gel (Petroleum ether/Ethyl acetate: 15:1), yielded **3ag** (81%, 114 mg) as white solid. <sup>1</sup>H NMR (600 MHz, CDCl<sub>3</sub>) δ = 8.27–8.24 (m, 3H), 8.20 (d, *J* = 8.4 Hz, 1H), 7.94 (d, *J* = 8.6 Hz, 1H), 7.85 (d, *J* = 8.7 Hz, 1H), 7.79–7.73 (m, 3H), 7.71–7.67 (m, 2H), 7.56–7.53 (m, 1H), 7.52–7.49 (m, 2H), 7.40–7.38 (m, 1H). <sup>13</sup>C NMR (100 MHz, CDCl<sub>3</sub>) δ = 156.9, 148.3, 142.1, 140.6, 138.5, 136.9, 129.8, 129.7, 128.9, 128.0, 127.63, 127.59, 127.5, 127.2, 126.4, 119.0.

The spectral data are in accordance with those reported in the literature.<sup>2</sup>

### 2-(4-Fluorophenyl)quinoline (3ah)

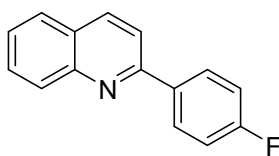

The procedure was followed using [Fe] (2.0 mol%, 6.3 mg), KO*t*-Bu (75 mol%, 42 mg), **1a** (62 mg, 0.5 mmol) and 1-(4-fluorophenyl)ethan-1-ol (190 μL, 1.5 mmol) under 135 °C for 24 h. Purification by column chromatography of silica gel (Petroleum ether/ Ethyl acetate: 15:1), yielded **3ah** (60%, 67 mg) as white solid. <sup>1</sup>H NMR (400 MHz, CDCl<sub>3</sub>) δ = 8.22 (d, *J* = 8.6 Hz, 1H), 8.18–8.13 (m, 3H), 7.83 (d, *J* = 8.5 Hz, 2H), 7.75–7.72 (m, 1H), 7.55–7.52 (m, 1H), 7.24–7.18 (m, 2H). <sup>13</sup>C NMR (100 MHz, CDCl<sub>3</sub>) δ = 165.1(d, *J* = 249 Hz), 156.3, 148.2, 137.0, 135.8 (d, *J* = 3.0 Hz), 129.8, 129.6, 129.4 (d, *J* = 8.4 Hz), 127.5, 127.1, 126.4, 118.7, 115.8 (d, *J* = 21.7Hz). <sup>19</sup>F NMR (376 MHz, CDCl<sub>3</sub>) δ = -112.50.

The spectral data are in accordance with those reported in the literature.<sup>2</sup>

### 2-(4-Chlorophenyl)quinoline (3ai)

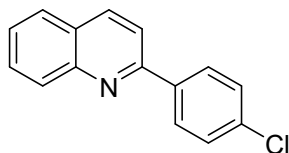

The procedure was followed using [Fe] (2.0 mol%, 6.3 mg), KO*t*-Bu (75 mol%, 42 mg), **1a** (62 mg, 0.5 mmol) and 1-(4-chlorophenyl)ethan-1-ol (201  $\mu$ L, 1.5 mmol) under 120 °C for 24 h. Purification by column chromatography of silica gel (Petroleum ether/Ethyl acetate: 15:1), yielded **3ai** (68%, 81 mg) as white solid.  $^1\text{H}$  NMR (600 MHz,  $\text{CDCl}_3$ )  $\delta$  = 8.24 (d,  $J$  = 8.5 Hz, 1H), 8.15 (d,  $J$  = 8.4 Hz, 1H), 8.14–8.09 (m, 2H), 7.87–7.81 (m, 2H), 7.75–7.72 (m, 1H), 7.56–7.53 (m, 1H), 7.51–7.48 (m, 2H).  $^{13}\text{C}$  NMR (100 MHz,  $\text{CDCl}_3$ )  $\delta$  = 156.0, 148.2, 138.0, 137.0, 135.6, 129.9, 129.7, 129.0, 128.8, 127.5, 127.2, 126.5, 118.6.

The spectral data are in accordance with those reported in the literature.<sup>2</sup>

### 2-(4-Bromophenyl)quinoline (3aj)

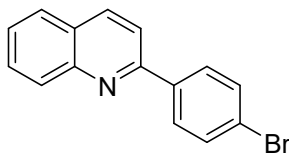

The procedure was followed using [Fe] (2.0 mol%, 6.3 mg), KO*t*-Bu (75 mol%, 42 mg), **1a** (62 mg, 0.5 mmol) and 1-(4-bromophenyl)ethan-1-ol (207  $\mu$ L, 1.5 mmol) under 120 °C for 24 h. Purification by column chromatography of silica gel (Petroleum ether/Ethyl acetate: 15:1), yielded **3aj** (61%, 87 mg) as white solid.  $^1\text{H}$  NMR (400 MHz,  $\text{CDCl}_3$ )  $\delta$  = 8.24 (d,  $J$  = 8.9 Hz, 1H), 8.15 (d,  $J$  = 8.5 Hz, 1H), 8.10–8.02 (m, 2H), 7.87–7.82 (m, 2H), 7.76–7.71 (m, 1H), 7.67–7.61 (m, 2H), 7.56–7.52 (m, 1H).  $^{13}\text{C}$  NMR (100 MHz,  $\text{CDCl}_3$ )  $\delta$  = 156.1, 148.3, 138.5, 137.0, 132.0, 129.9, 129.7, 129.1, 127.5, 127.3, 126.5, 124.0, 118.5.

The spectral data are in accordance with those reported in the literature.<sup>2</sup>



### 2-(4-(Trifluoromethyl)phenyl)quinoline (3ak)

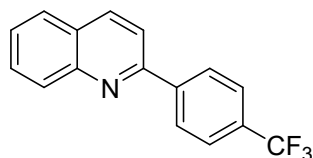

The procedure was followed using [Fe] (2.0 mol%, 6.3 mg), KO*t*-Bu (75 mol%, 42 mg), **1a** (62 mg, 0.5 mmol) and 1-(4-(trifluoromethyl)phenyl)ethan-1-ol (231  $\mu$ L, 1.5 mmol) under 135 °C for 24 h. Purification by column chromatography of silica gel (Petroleum ether/ Ethyl acetate: 15:1), yielded **3ak** (59%, 81 mg) as white solid. <sup>1</sup>H NMR (600 MHz, CDCl<sub>3</sub>)  $\delta$  = 8.29–8.26 (m, 3H), 8.19 (d, *J* = 8.4 Hz, 1H), 7.89 (d, *J* = 8.6 Hz, 1H), 7.86 (d, *J* = 8.2 Hz, 1H), 7.79–7.75 (m, 3H), 7.59–7.56 (m, 1H). <sup>13</sup>C NMR (100 MHz, CDCl<sub>3</sub>)  $\delta$  = 155.7, 148.3, 142.9, 137.2, 131.1 (q, *J* = 32.5 Hz), 130.0, 129.9, 127.9, 127.6, 127.4, 126.9, 125.8 (q, *J* = 3.8 Hz), 124.2 (q, *J* = 272.1 Hz), 118.8. <sup>19</sup>F NMR (565 MHz, CDCl<sub>3</sub>)  $\delta$  = -62.56.

The spectral data are in accordance with those reported in the literature.<sup>2</sup>

### 2-(3-Chlorophenyl)quinoline (3al)

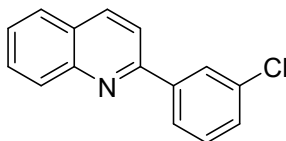

The procedure was followed using [Fe] (2.0 mol%, 6.3 mg), KO*t*-Bu (75 mol%, 42 mg), **1a** (62 mg, 0.5 mmol) and 1-(3-chlorophenyl)ethan-1-ol (201  $\mu$ L, 1.5 mmol) under 120 °C for 24 h. Purification by column chromatography of silica gel (Petroleum ether/ Ethyl acetate: 15:1), yielded **3al** (81%, 97 mg) as white solid. <sup>1</sup>H NMR (400 MHz, CDCl<sub>3</sub>)  $\delta$  = 8.25–8.15 (m, 3H), 8.05–8.00 (m, 1H), 7.84–7.82 (m, 2H), 7.77–7.71 (m, 1H), 7.57–7.53 (m, 1H), 7.46–7.42 (m, 2H). <sup>13</sup>C NMR (100 MHz, CDCl<sub>3</sub>)  $\delta$  = 155.8, 148.2, 141.4, 137.1, 135.0, 130.1, 130.0, 129.7, 129.3, 127.8, 127.5, 127.4, 126.7, 125.6, 118.8.

The spectral data are in accordance with those reported in the literature.<sup>5</sup>

### 2-(3-(Trifluoromethyl)phenyl)quinoline (3am)

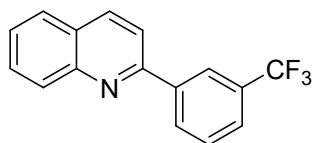

The procedure was followed using [Fe] (2.0 mol%, 6.3 mg), KO*t*-Bu (75 mol%, 42 mg), **1a** (62 mg, 0.5 mmol) and 1-(3-(trifluoromethyl)phenyl)ethan-1-ol (231  $\mu$ L, 1.5 mmol) under 120 °C for 24 h. Purification by column chromatography of silica gel (Petroleum ether/ Ethyl acetate: 15:1), yielded **3am** (74%, 101 mg) as white solid. <sup>1</sup>H NMR (400 MHz, CDCl<sub>3</sub>)  $\delta$  = 8.46 (s, 1H), 8.36 (d, *J* = 7.7 Hz, 1H), 8.27 (d, *J* = 7.8 Hz, 1H), 8.19 (d, *J* = 8.4 Hz, 1H), 7.90 (d, *J* = 8.6 Hz, 1H), 7.86 (d, *J* = 8.1 Hz, 1H), 7.79–7.70 (m, 2H), 7.68–7.62 (m, 1H), 7.59–7.55 (m, 1H). <sup>13</sup>C NMR (150 MHz, CDCl<sub>3</sub>)  $\delta$  = 155.6, 148.2, 140.4, 137.2, 131.4, 130.7, 130.0, 129.8, 129.3, 127.5, 127.4, 126.8, 125.9 (q, *J* = 3.7 Hz), 124.4 (q, *J* = 3.8 Hz), 124.2 (q, *J* = 272.6 Hz), 118.6. <sup>19</sup>F NMR (376 MHz, CDCl<sub>3</sub>)  $\delta$  = -62.54.

The spectral data are in accordance with those reported in the literature.<sup>6</sup>

### 2-(3-Methoxyphenyl)quinoline (3an)

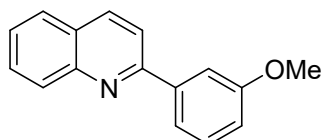

The procedure was followed using [Fe] (2.0 mol%, 6.3 mg), KO*t*-Bu (75 mol%, 42 mg), **1a** (62 mg, 0.5 mmol) and 1-(3-methoxyphenyl)ethan-1-ol (212  $\mu$ L, 1.5 mmol) under 120 °C for 24 h. Purification by column chromatography of silica gel (Petroleum ether/ Ethyl acetate: 15:1), yielded **3an** (84%, 99 mg) as yellow oil. <sup>1</sup>H NMR (600 MHz, CDCl<sub>3</sub>)  $\delta$  = 8.20 (d, *J* = 8.5 Hz, 1H), 8.18 (d, *J* = 8.5 Hz, 1H), 7.85 (d, *J* = 8.5 Hz, 1H), 7.82 (d, *J* = 6.7 Hz, 1H), 7.78–7.77 (m, 1H), 7.75–7.67 (m, 2H), 7.54–7.49 (m, 1H), 7.42 (t, *J* = 7.9 Hz, 1H), 7.02 (dd, *J* = 8.2, 2.6 Hz, 1H), 3.93 (s, 3H). <sup>13</sup>C NMR (100 MHz, CDCl<sub>3</sub>)  $\delta$  = 160.1, 157.2, 148.2, 141.1, 136.9, 129.9, 129.73, 129.71, 127.5, 127.3, 126.4, 120.1, 119.2, 115.4, 112.7, 55.5.

The spectral data are in accordance with those reported in the literature.<sup>2</sup>

### 2-(*m*-Tolyl)quinoline(3ao)

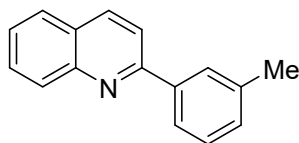

The procedure was followed using [Fe] (2.0 mol%, 6.3 mg), KO*t*-Bu (75 mol%, 42 mg), **1a** (62 mg, 0.5 mmol) and 1-(*m*-tolyl)ethan-1-ol (207  $\mu$ L, 1.5 mmol) under 120 °C for 24 h. Purification by column chromatography of silica gel (Petroleum ether/Ethyl acetate: 15:1), yielded **3ao** (82%, 90 mg) as yellow solid. <sup>1</sup>H NMR (600 MHz, CDCl<sub>3</sub>)  $\delta$  = 8.22 (d, *J* = 8.6 Hz, 1H), 8.19 (d, *J* = 8.4 Hz, 1H), 8.02 (s, 1H), 7.93 (d, *J* = 6.8 Hz, 1H), 7.87 (d, *J* = 8.6 Hz, 1H), 7.83 (d, *J* = 6.8 Hz, 1H), 7.75–7.72 (m, 1H), 7.54–7.52 (m, 1H), 7.42 (t, *J* = 7.6 Hz, 1H), 7.29 (d, *J* = 7.5 Hz, 1H), 2.49 (s, 3H). <sup>13</sup>C NMR (100 MHz, CDCl<sub>3</sub>)  $\delta$  = 157.6, 148.3, 139.7, 138.6, 136.8, 130.2, 129.7 (2C), 128.8, 128.3, 127.5, 127.2, 126.3, 124.7, 119.2, 21.7.

The spectral data are in accordance with those reported in the literature.<sup>2</sup>

### 2-(2-Methoxyphenyl)quinoline (3ap)

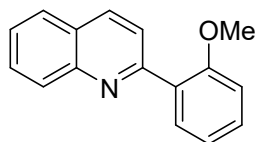

The procedure was followed using [Fe] (2.0 mol%, 6.3 mg), KO*t*-Bu (75 mol%, 42 mg), **1a** (62 mg, 0.5 mmol) and 1-(2-methoxyphenyl)ethan-1-ol (211  $\mu$ L, 1.5 mmol) under 135 °C for 24 h. Purification by column chromatography of silica gel (Petroleum ether/Ethyl acetate: 15:1), yielded **3ap** (55%, 65 mg) as yellow oil. <sup>1</sup>H NMR (400 MHz, CDCl<sub>3</sub>)  $\delta$  = 8.17 (d, *J* = 8.8 Hz, 1H), 8.15 (d, *J* = 8.6 Hz, 1H), 7.88 (d, *J* = 8.5 Hz, 1H), 7.86–7.82 (m, 2H), 7.73–7.68 (m, 1H), 7.55–7.51 (m, 1H), 7.44–7.40 (m, 1H), 7.13 (t, *J* = 7.0 Hz, 1H), 7.04 (d, *J* = 8.3 Hz, 1H), 3.87 (s, 3H). <sup>13</sup>C NMR (150 MHz, CDCl<sub>3</sub>)  $\delta$  = 157.21, 157.16, 148.3, 135.1, 131.5, 130.4, 129.74, 129.65, 129.2, 127.4, 127.1, 126.2, 123.5, 121.3, 111.5, 55.7.

The spectral data are in accordance with those reported in the literature.<sup>2</sup>

### 2-(3,4-Dimethylphenyl) quinoline (3aq)

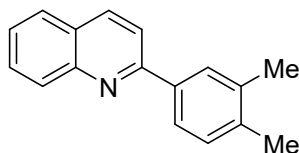

The procedure was followed using [Fe] (2.0 mol%, 6.3 mg), KO*t*-Bu (75 mol%, 42 mg), **1a** (62 mg, 0.5 mmol) and 1-(3,4-dimethylphenyl)ethan-1-ol (225 mg, 1.5 mmol) under 120 °C for 24 h. Purification by column chromatography of silica gel (Petroleum ether/ Ethyl acetate: 15:1), yielded **3aq** (80%, 93 mg) as yellow solid. <sup>1</sup>H NMR (400 MHz, CDCl<sub>3</sub>) δ = 8.21–8.17 (m, 2H), 7.99 (d, *J* = 1.9 Hz, 1H), 7.88–7.86 (m, 2H), 7.82 (d, *J* = 6.7 Hz, 1H), 7.74–7.70 m, 1H), 7.53–7.49 (m, 1H), 7.29 (d, *J* = 7.8 Hz, 1H), 2.40 (s, 3H), 2.35 (s, 3H). <sup>13</sup>C NMR (100 MHz, CDCl<sub>3</sub>) δ = 157.6, 148.3, 138.2, 137.2, 137.2, 136.7, 130.2, 129.6, 129.6, 128.7, 127.5, 127.1, 126.1, 125.0, 119.0, 77.4, 77.1, 76.8, 20.1, 19.8.

The spectral data are in accordance with those reported in the literature.<sup>7</sup>

### 2-(Naphthalen-2-yl)quinoline (3ar)

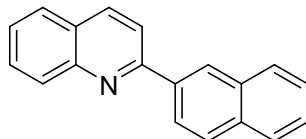

The procedure was followed using [Fe] (2.0 mol%, 6.3 mg), KO*t*-Bu (75 mol%, 42 mg), **1a** (62 mg, 0.5 mmol) and 1-(naphthalen-2-yl)ethan-1-ol (258 mg, 1.5 mmol) under 120 °C for 24 h. Purification by column chromatography of silica gel (Petroleum ether/ Ethyl acetate: 15:1), yielded **3ar** 88% (112 mg) as white solid. <sup>1</sup>H NMR (600 MHz, CDCl<sub>3</sub>) δ = 8.63 (s, 1H), 8.38 (d, *J* = 8.4 Hz, 1H), 8.27 (d, *J* = 8.6 Hz, 1H), 8.23 (d, *J* = 8.5 Hz, 1H), 8.05 (d, *J* = 8.6 Hz, 1H), 8.01 (d, *J* = 8.1 Hz, 2H), 7.95–7.88 (m, 1H), 7.86 (d, *J* = 8.2 Hz, 1H), 7.77–7.74 (m, 1H), 7.57–7.53 (m, 3H). <sup>13</sup>C NMR (150 MHz, CDCl<sub>3</sub>) δ = 157.2, 148.4, 136.94, 136.87, 133.9, 133.5, 129.8, 129.7, 128.9, 128.6, 127.7, 127.5, 127.3, 127.2, 126.7, 126.4, 126.4, 125.1, 119.2.

The spectral data are in accordance with those reported in the literature.<sup>4</sup>

### 2-(Benzo[*d*][1,3] dioxol-5-yl)quinoline (3as)

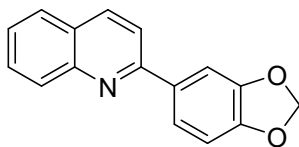

The procedure was followed using [Fe] (2.0 mol%, 6.3 mg), KO*t*-Bu (75 mol%, 42 mg), **1a** (62 mg, 0.5 mmol) and 1-(benzo[*d*][1,3]dioxol-5-yl)ethan-1-ol (249 mg, 1.5 mmol) under 120 °C for 24 h. Purification by column chromatography of silica gel (Petroleum ether/ Ethyl acetate: 15:1), yielded **3as** (80%, 100 mg) as yellow solid. <sup>1</sup>H NMR (400 MHz, CDCl<sub>3</sub>) δ = 8.17 (d, *J* = 8.6 Hz, 1H), 8.13 (d, *J* = 8.5 Hz, 1H), 7.82–7.78 (m, 2H), 7.76–7.68 (m, 2H), 7.66 (dd, *J* = 8.1, 1.8 Hz, 1H), 7.52–7.48 (m, 1H), 6.95 (d, *J* = 8.2 Hz, 1H), 6.04 (s, 2H). <sup>13</sup>C NMR (100 MHz, CDCl<sub>3</sub>) δ = 156.7, 148.8, 148.4, 148.2, 136.7, 134.1, 129.7, 129.5, 127.5, 127.0, 126.1, 121.8, 118.7, 108.5, 107.9, 101.4.

The spectral data are in accordance with those reported in the literature.<sup>8</sup>

### 2-(Furan-2-yl)quinoline (3at)

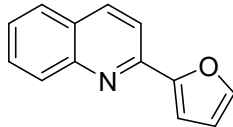

The procedure was followed using [Fe] (2.0 mol%, 6.3 mg), KO*t*-Bu (75 mol%, 42 mg), **1a** (62 mg, 0.5 mmol) and 1-(furan-2-yl)ethan-1-ol (156 μL, 1.5 mmol) under 120 °C for 24 h. Purification by column chromatography of silica gel (Petroleum ether/ Ethyl acetate: 15:1), yielded **3at** (78%, 76 mg) as white solid. <sup>1</sup>H NMR (400 MHz, CDCl<sub>3</sub>) δ = 8.16 (d, *J* = 7.8 Hz, 1H), 8.13 (d, *J* = 8.4 Hz, 1H), 7.83–7.75 (m, 2H), 7.73–7.68 (m, 1H), 7.63 (dd, *J* = 1.8, 0.8 Hz, 1H), 7.52–7.47 (m, 1H), 7.22 (dd, *J* = 3.5, 0.8 Hz, 1H), 6.59 (dd, *J* = 3.4, 1.8 Hz, 1H). <sup>13</sup>C NMR (150 MHz, CDCl<sub>3</sub>) δ = 153.7, 149.0, 148.1, 144.1, 136.7, 129.9, 129.4, 127.6, 127.2, 126.2, 117.5, 112.2, 110.2.

The spectral data are in accordance with those reported in the literature.<sup>9</sup>

### 2-(Thiophen-2-yl)quinoline (3au)

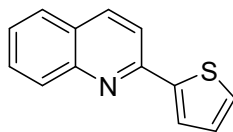

The procedure was followed using [Fe] (2.0 mol%, 6.3 mg), KO*t*-Bu (75 mol%, 42 mg), **1a** (62 mg, 0.5 mmol) and 1-(thiophen-2-yl)ethan-1-ol (165  $\mu$ L, 1.5 mmol) under 120 °C for 24 h. Purification by column chromatography of silica gel (Petroleum ether/Ethyl acetate: 15:1), yielded **3au** (76%, 80 mg) as yellow solid. <sup>1</sup>H NMR (600 MHz, CDCl<sub>3</sub>)  $\delta$  = 8.14 (d, *J* = 8.6 Hz, 1H), 8.10 (d, *J* = 8.4 Hz, 1H), 7.80 (d, *J* = 8.6 Hz, 1H), 7.79–7.75 (m, 1H), 7.75–7.72 (m, 1H), 7.71–7.67 (m, 1H), 7.51–7.45 (m, 2H), 7.19 (dd, *J* = 5.0, 3.7 Hz, 1H). <sup>13</sup>C NMR (100 MHz, CDCl<sub>3</sub>)  $\delta$  = 152.3, 148.1, 145.3, 136.7, 129.9, 129.2, 128.7, 128.1, 127.5, 127.2, 126.2, 125.9, 117.7.

The spectral data are in accordance with those reported in the literature.<sup>2</sup>

### 2-Hexylquinoline (3av)

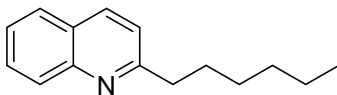

The procedure was followed using [Fe] (2.0 mol%, 6.3 mg), KO*t*-Bu (75 mol%, 42 mg), **1a** (62 mg, 0.5 mmol) and octan-2-ol (239  $\mu$ L, 1.5 mmol) under 120 °C for 24 h. Purification by column chromatography of silica gel (Petroleum ether/Ethyl acetate: 15:1), yielded **3av** (59%, 63 mg) as yellow oil. <sup>1</sup>H NMR (400 MHz, CDCl<sub>3</sub>)  $\delta$  = 8.09–8.00 (m, 2H), 7.74 (dd, *J* = 8.1, 1.5 Hz, 1H), 7.66 (ddd, *J* = 8.5, 6.9, 1.5 Hz, 1H), 7.49–7.41 (m, 1H), 7.27 (d, *J* = 8.4 Hz, 1H), 3.02–2.85 (m, 2H), 1.87–1.72 (m, 2H), 1.45–1.36 (m, 2H), 1.36–1.25 (m, 4H), 0.92–0.83 (m, 3H). <sup>13</sup>C NMR (100 MHz, CDCl<sub>3</sub>)  $\delta$  = 163.1, 147.9, 136.2, 129.3, 128.8, 127.5, 126.7, 125.6, 121.4, 39.4, 31.8, 30.1, 29.3, 22.6, 14.1.

The spectral data are in accordance with those reported in the literature.<sup>10</sup>

### 2,3-Dihydro-1H-cyclopenta[*b*]quinoline (3aw)

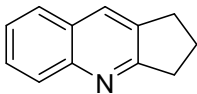

The procedure was followed using [Fe] (2.0 mol%, 6.3 mg), KO*t*-Bu (75 mol%, 42 mg), **1a** (62 mg, 0.5 mmol) and cyclopentanol (136  $\mu$ L, 1.5 mmol) under 120 °C for 24 h. Purification by column chromatography of silica gel (Petroleum ether/Ethyl acetate: 15:1), yielded **3aw** (68%, 58 mg) as yellow oil. <sup>1</sup>H NMR (600 MHz, CDCl<sub>3</sub>)  $\delta$  = 8.01 (d, *J* = 8.4 Hz, 1H), 7.88 (s, 1H), 7.72 (dd, *J* = 8.1, 1.4 Hz, 1H), 7.61 (ddd, *J* = 8.4, 6.8, 1.5 Hz, 1H), 7.45 (ddd, *J* = 8.1, 6.8, 1.2 Hz, 1H), 3.16 (t, *J* = 7.6 Hz, 2H), 3.08 (t, *J* = 7.4 Hz, 2H), 2.20 (tt, *J* = 7.6, 7.6 Hz, 2H). <sup>13</sup>C NMR (100 MHz, CDCl<sub>3</sub>)  $\delta$  = 167.9, 147.5, 135.6, 130.4, 128.6, 128.4, 127.5, 127.4, 125.5, 34.7, 30.6, 23.7.

The spectral data are in accordance with those reported in the literature.<sup>11</sup>

### 1,2,3,4-Tetrahydroacridine (3ax)

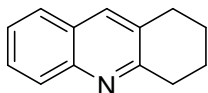

The procedure was followed using [Fe] (2.0 mol%, 6.3 mg), KO*t*-Bu (75 mol%, 42 mg), **1a** (62 mg, 0.5 mmol) and cyclohexanol (158  $\mu$ L, 1.5 mmol) under 120 °C for 24 h. Purification by column chromatography of silica gel (Petroleum ether/ Ethyl acetate: 15:1), yielded **3ax** (61%, 56 mg) as yellow oil. <sup>1</sup>H NMR (600 MHz, CDCl<sub>3</sub>)  $\delta$  = 7.99 (d, *J* = 8.5 Hz, 1H), 7.83 (s, 1H), 7.72 (dd, *J* = 8.2, 1.4 Hz, 1H), 7.64–7.61 (m, 1H), 7.45–7.40 (m, 1H), 3.15 (t, *J* = 6.6 Hz, 2H), 3.00 (t, *J* = 6.4 Hz, 2H), 2.08–1.94 (m, 2H), 1.92 (m, 2H). <sup>13</sup>C NMR (100 MHz, CDCl<sub>3</sub>)  $\delta$  = 159.3, 146.6, 135.0, 131.0, 128.5, 128.3, 127.2, 126.9, 125.5, 33.6, 29.3, 23.3, 22.9.

The spectral data are in accordance with those reported in the literature.<sup>3</sup>

### 7,8,9,10-Tetrahydro-6*H*-cyclohepta[*b*]quinoline (**3ay**)

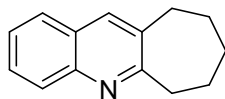

The procedure was followed using **[Fe]** (2.0 mol%, 6.3 mg), KO*t*-Bu (75 mol%, 42 mg), **1a** (62 mg, 0.5 mmol) and cycloheptanol (181  $\mu$ L, 1.5 mmol) under 120  $^{\circ}$ C for 24 h. Purification by column chromatography of silica gel (Petroleum ether/ Ethyl acetate: 15:1), yielded **3ay** (84%, 83 mg) as white solid.  $^1\text{H}$  NMR (400 MHz,  $\text{CDCl}_3$ )  $\delta$  = 8.00 (d,  $J$  = 8.5 Hz, 1H), 7.79 (s, 1H), 7.70 (d,  $J$  = 8.2 Hz, 1H), 7.64–7.58 (m, 1H), 7.46–7.42 (m, 1H), 3.24–3.14 (m, 2H), 2.98–2.90 (m, 2H), 1.92–1.87 (m, 2H), 1.82–1.78 (m, 2H), 1.78–1.68 (m, 2H).  $^{13}\text{C}$  NMR (100 MHz,  $\text{CDCl}_3$ )  $\delta$  = 164.7, 146.3, 136.5, 134.6, 128.46, 128.45, 127.4, 126.8, 125.7, 40.1, 35.5, 32.3, 28.9, 27.0.

The spectral data are in accordance with those reported in the literature.<sup>12</sup>

### 11*H*-Indeno[1,2-*b*]quinoline (**3az**)

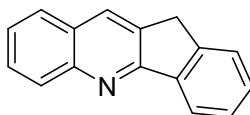

The procedure was followed using **[Fe]** (2.0 mol%, 6.3 mg), KO*t*-Bu (75 mol%, 42 mg), **1a** (62 mg, 0.5 mmol) and 2,3-dihydro-1*H*-inden-1-ol (201 mg, 1.5 mmol) under 120  $^{\circ}$ C for 24 h. Purification by column chromatography of silica gel (Petroleum ether/ Ethyl acetate: 15:1), yielded **3az** (86%, 93 mg) as white solid.  $^1\text{H}$  NMR (400 MHz,  $\text{CDCl}_3$ )  $\delta$  = 8.31 (dd,  $J$  = 6.4, 2.3 Hz, 1H), 8.23–8.14 (m, 2H), 7.81 (dd,  $J$  = 8.1, 1.4 Hz, 1H), 7.70 (ddd,  $J$  = 8.5, 6.8, 1.6 Hz, 1H), 7.60 (dd,  $J$  = 6.2, 2.2 Hz, 1H), 7.56–7.45 (m, 3H), 4.03 (s, 2H).  $^{13}\text{C}$  NMR (100 MHz,  $\text{CDCl}_3$ )  $\delta$  = 161.7, 148.0, 145.1, 140.3, 134.6, 131.2, 130.0, 129.1, 128.9, 127.8, 127.6, 127.4, 125.7, 125.5, 122.1, 34.0.

The spectral data are in accordance with those reported in the literature.<sup>13</sup>



### 5,6-Dihydrobenzo[*c*]acridine (**3aaa**)

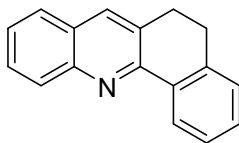

The procedure was followed using **[Fe]** (2.0 mol%, 6.3 mg), KO*t*-Bu (75 mol%, 42 mg), **1a** (62 mg, 0.5 mmol) and 1,2,3,4-tetrahydronaphthalen-1-ol (204  $\mu$ L, 1.5 mmol) under 120 °C for 24 h. Purification by column chromatography of silica gel (Petroleum ether/Ethyl acetate: 15:1), yielded **3aaa** (94%, 109 mg) as yellow solid.  $^1\text{H}$  NMR (600 MHz,  $\text{CDCl}_3$ )  $\delta$  = 8.58 (d,  $J$  = 9.1 Hz, 1H), 8.14 (d,  $J$  = 8.4 Hz, 1H), 7.93 (s, 1H), 7.75 (d,  $J$  = 8.1 Hz, 1H), 7.67–7.64 (m, 1H), 7.49–7.46 (m, 1H), 7.46–7.40 (m, 1H), 7.39–7.36 (m, 1H), 7.28 (dd,  $J$  = 7.4, 1.3 Hz, 1H), 3.14 (dd,  $J$  = 9.6, 6.7 Hz, 2H), 3.02 (dd,  $J$  = 8.5, 5.6 Hz, 2H).  $^{13}\text{C}$  NMR (150 MHz,  $\text{CDCl}_3$ )  $\delta$  = 153.4, 147.7, 139.4, 134.7, 133.7, 130.6, 129.7, 129.4, 128.7, 128.0, 127.9, 127.4, 126.9, 126.1 (2C), 28.9, 28.4.

The spectral data are in accordance with those reported in the literature.<sup>14</sup>

### 3-Methyl-2-phenylquinoline (**3aab**)

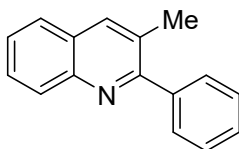

The procedure was followed using **[Fe]** (2.0 mol%, 6.3 mg), KO*t*-Bu (75 mol%, 42 mg), **1a** (62 mg, 0.5 mmol) and 1-phenylpropan-1-ol (206  $\mu$ L, 1.5 mmol) under 120 °C for 24 h. Purification by column chromatography of silica gel (Petroleum ether/ Ethyl acetate: 15:1), yielded **3aab** 66% yield (72 mg) as yellow oil.  $^1\text{H}$  NMR (600 MHz,  $\text{CDCl}_3$ )  $\delta$  = 8.14 (d,  $J$  = 8.4 Hz, 1H), 8.02 (s, 1H), 7.78 (d,  $J$  = 6.8 Hz, 1H), 7.68–7.65 (m, 1H), 7.60 (d,  $J$  = 6.8 Hz, 2H), 7.53–7.48 (m, 3H), 7.46–7.43 (m, 1H), 2.47 (s, 3H).  $^{13}\text{C}$  NMR (100 MHz,  $\text{CDCl}_3$ )  $\delta$  = 160.6, 146.6, 140.9, 136.8, 129.3, 129.2, 128.9, 128.8, 128.3, 128.2, 127.6, 126.7, 126.4, 20.7.

The spectral data are in accordance with those reported in the literature.<sup>12</sup>

### 6-Methyl-2-phenylquinoline (3ba)

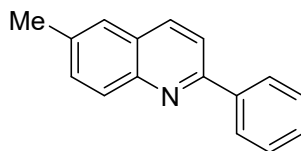

The procedure was followed using [Fe] (2.0 mol%, 6.3 mg), KO*t*-Bu (75 mol%, 42 mg), (2-amino-5-methylphenyl)methanol (69 mg, 0.5 mmol) and 1-phenylethan-1-ol (180  $\mu$ L, 1.5 mmol) under 120  $^{\circ}$ C for 24 h. Purification by column chromatography of silica gel (Petroleum ether/Ethyl acetate: 15:1), yielded **3ba** (80%, 88 mg) as white solid.  $^1\text{H}$  NMR (600 MHz,  $\text{CDCl}_3$ )  $\delta$  = 8.16–8.15 (m, 2H), 8.13 (d,  $J$  = 8.5 Hz, 1H), 8.08 (d,  $J$  = 8.5 Hz, 1H), 7.84 (d,  $J$  = 8.5 Hz, 1H), 7.61–7.50 (m, 4H), 7.47–7.45 (m, 1H), 2.58 (s, 3H).  $^{13}\text{C}$  NMR (150 MHz,  $\text{CDCl}_3$ )  $\delta$  = 156.6, 146.9, 139.8, 136.18, 136.16, 132.0, 129.4, 129.2, 128.8, 127.5, 127.2, 126.4, 119.0, 21.7.

The spectral data are in accordance with those reported in the literature.<sup>14</sup>

### 7-Chloro-2-phenylquinoline (3ca)

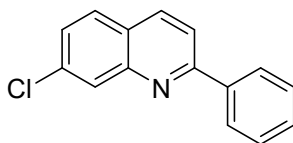

The procedure was followed using [Fe] (2.0 mol%, 6.3 mg), KO*t*-Bu (75 mol%, 42 mg), (2-amino-4-chlorophenyl)methanol (79 mg, 0.5 mmol) and 1-phenylethan-1-ol (180  $\mu$ L, 1.5 mmol) under 120  $^{\circ}$ C for 24 h. Purification by column chromatography of silica gel (Petroleum ether/Ethyl acetate: 15:1), yielded **3ca** (63%, 76 mg) as white solid.  $^1\text{H}$  NMR (600 MHz,  $\text{CDCl}_3$ )  $\delta$  = 8.21–8.14 (m, 4H), 7.89 (d,  $J$  = 8.5 Hz, 1H), 7.77 (d,  $J$  = 8.6 Hz, 1H), 7.57–7.52 (m, 3H), 7.51–7.44 (m, 2H).  $^{13}\text{C}$  NMR (150 MHz,  $\text{CDCl}_3$ )  $\delta$  = 158.3, 148.6, 139.2, 136.6, 135.5, 129.7, 128.9, 128.70, 128.68, 127.6, 127.3, 125.5, 119.2.

The spectral data are in accordance with those reported in the literature.<sup>14</sup>

### 7-Methoxy-2-phenylquinoline (3da)

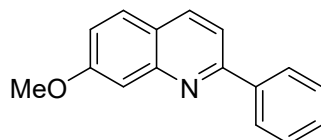

The procedure was followed using [Fe] (2.0 mol%, 6.3 mg), KO*t*-Bu (75 mol%, 42 mg), (2-amino-4-methoxyphenyl)methanol (77 mg, 0.5 mmol) and 1-phenylethan-1-ol (180  $\mu$ L, 1.5 mmol) under 120 °C for 24 h. Purification by column chromatography of silica gel (Petroleum ether/ Ethyl acetate: 15:1), yielded **3da** (79%, 93 mg) as white solid. <sup>1</sup>H NMR (600 MHz, CDCl<sub>3</sub>)  $\delta$  = 8.13 (d, *J* = 8.0 Hz, 3H), 7.73 (d, *J* = 8.4 Hz, 1H), 7.71 (d, *J* = 8.9 Hz, 1H), 7.55–7.49 (m, 3H), 7.48–7.45 (m, 1H), 7.19 (dd, *J* = 8.9, 2.5 Hz, 1H), 3.98 (s, 3H). <sup>13</sup>C NMR (150 MHz, CDCl<sub>3</sub>)  $\delta$  = 160.9, 157.7, 150.0, 139.9, 136.4, 129.2, 128.8, 128.5, 127.6, 122.4, 119.6, 117.0, 107.6, 55.6.

The spectral data are in accordance with those reported in the literature.<sup>4</sup>

### 8-Methyl-2-phenylquinoline (3ea)

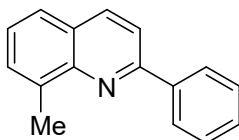

The procedure was followed using [Fe] (2.0 mol%, 6.3 mg), KO*t*-Bu (75 mol%, 42 mg), (2-amino-3-methylphenyl)methanol (69 mg, 0.5 mmol) and 1-phenylethan-1-ol (180  $\mu$ L, 1.5 mmol) under 120 °C for 24 h. Purification by column chromatography of silica gel (Petroleum ether/ Ethyl acetate: 15:1), yielded **3ea** (92%, 101 mg) as white solid. <sup>1</sup>H NMR (600 MHz, CDCl<sub>3</sub>)  $\delta$  = 8.30 (dd, *J* = 8.2, 1.4 Hz, 2H), 8.18 (d, *J* = 8.5 Hz, 1H), 7.91 (d, *J* = 8.5 Hz, 1H), 7.68 (d, *J* = 8.1 Hz, 1H), 7.60 (d, *J* = 7.0 Hz, 1H), 7.56 (dd, *J* = 8.4, 6.9 Hz, 2H), 7.51–7.48 (m, 1H), 7.46–7.42 (m, 1H), 2.96 (s, 3H). <sup>13</sup>C NMR (150 MHz, CDCl<sub>3</sub>)  $\delta$  = 155.6, 147.2, 139.9, 137.7, 137.0, 129.7, 129.3, 128.8, 127.5, 127.1, 126.1, 125.5, 118.3, 18.0.

The spectral data are in accordance with those reported in the literature.<sup>15</sup>

### 8-Chloro-2-phenylquinoline (3fa)

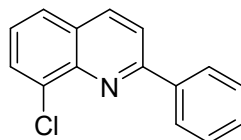

The procedure was followed using [Fe] (2.0 mol%, 6.3 mg), KO*t*-Bu (75 mol%, 42 mg), (2-amino-3-chlorophenyl)methanol (69 mg, 0.5 mmol) and 1-phenylethan-1-ol (180  $\mu$ L, 1.5 mmol) under 120 °C for 24 h. Purification by column chromatography of silica gel (Petroleum ether/Ethyl acetate: 15:1), yielded **3fa** (60%, 72 mg) as colorless oil. <sup>1</sup>H NMR (600 MHz, CDCl<sub>3</sub>)  $\delta$  = 8.35–8.29 (m, 2H), 8.22 (d, *J* = 8.5 Hz, 1H), 7.97 (d, *J* = 8.6 Hz, 1H), 7.86 (dd, *J* = 7.4, 1.4 Hz, 1H), 7.74 (dd, *J* = 8.1, 1.3 Hz, 1H), 7.60–7.55 (m, 2H), 7.54–7.49 (m, 1H), 7.44 (t, *J* = 7.8 Hz, 1H). <sup>13</sup>C NMR (100 MHz, CDCl<sub>3</sub>)  $\delta$  = 157.4, 144.4, 139.1, 137.2, 134.0, 129.80, 129.78, 128.9, 128.5, 127.7, 126.6, 126.1, 119.4.

The spectral data are in accordance with those reported in the literature.<sup>16</sup>

### 2-Phenylbenzo[*g*]quinoline (3ga)

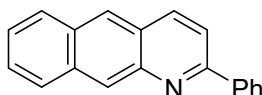

The procedure was followed using [Fe] (2.0 mol%, 6.3 mg), KO*t*-Bu (75 mol%, 42 mg), (3-aminonaphthalen-2-yl)methanol (87 mg, 0.5 mmol) and 1-phenylethan-1-ol (180  $\mu$ L, 1.5 mmol) under 120 °C for 24 h. Purification by column chromatography of silica gel (Petroleum ether/Ethyl acetate: 15:1), yielded **3ga** (65%, 83 mg) as yellow solid. <sup>1</sup>H NMR (400 MHz, CDCl<sub>3</sub>)  $\delta$  = 8.76 (s, 1H), 8.37 (d, *J* = 8.9 Hz, 2H), 8.28–8.18 (m, 2H), 8.09 (d, *J* = 9.4 Hz, 1H), 8.02 (d, *J* = 6.6 Hz, 1H), 7.87 (d, *J* = 8.9 Hz, 1H), 7.59–7.46 (m, 5H). <sup>13</sup>C NMR (100 MHz, CDCl<sub>3</sub>)  $\delta$  = 157.9, 144.7, 139.6, 137.1, 134.2, 131.8, 129.6, 128.9, 128.6, 128.1, 127.7, 127.6, 126.3, 126.2, 125.9, 125.6, 118.8.

The spectral data are in accordance with those reported in the literature.<sup>13</sup>

### 4-Methyl-2-phenylquinoline (3ha)

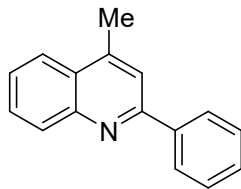

The procedure was followed using [Fe] (2.0 mol%, 6.3 mg), KO*t*-Bu (75 mol%, 42 mg), 1-(2-aminophenyl)ethan-1-ol (69 mg, 0.5 mmol) and 1-phenylethan-1-ol (180  $\mu$ L, 1.5 mmol) under 120 °C for 24 h. Purification by column chromatography of silica gel (Petroleum ether/ Ethyl acetate: 15:1), yielded **3ha** (61%, 67 mg) as white solid. <sup>1</sup>H NMR (600 MHz, CDCl<sub>3</sub>)  $\delta$  = 8.20–8.13 (m, 3H), 8.01 (d, *J* = 7.1 Hz, 1H), 7.76–7.70 (m, 2H), 7.58–7.50 (m, 3H), 7.48–7.45 (m, 1H), 2.78 (s, 3H). <sup>13</sup>C NMR (100 MHz, CDCl<sub>3</sub>)  $\delta$  = 157.1, 148.1, 144.9, 139.8, 130.3, 129.4, 129.2, 128.8, 127.6, 127.3, 126.1, 123.7, 119.8, 19.1.

The spectral data are in accordance with those reported in the literature.<sup>14</sup>

### 10-Methoxy-5,6-dihydrobenzo[*c*]acridine (3daa)

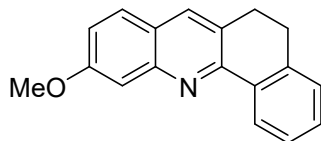

The procedure was followed using [Fe] (2.0 mol%, 6.3 mg), KO*t*-Bu (75 mol%, 42 mg), (2-amino-4-methoxyphenyl)methanol (77 mg, 0.5 mmol) and 1,2,3,4-tetrahydronaphthalen-1-ol (204  $\mu$ L, 1.5 mmol) under 120 °C for 24 h. Purification by column chromatography of silica gel (Petroleum ether/ Ethyl acetate: 15:1), yielded **3daa** (83%, 108 mg) as yellow solid. <sup>1</sup>H NMR (400 MHz, CDCl<sub>3</sub>)  $\delta$  = 8.53 (d, *J* = 7.7 Hz, 1H), 7.81 (s, 1H), 7.60 (d, *J* = 8.9 Hz, 1H), 7.46 (d, *J* = 2.5 Hz, 1H), 7.43–7.39 (m, 1H), 7.37–7.33 (m, 1H), 7.26–7.24 (m, 1H), 7.12 (dd, *J* = 8.9, 2.5 Hz, 1H), 3.96 (s, 3H), 3.09–3.02 (m, 2H), 3.01–2.94 (m, 2H). <sup>13</sup>C NMR (100 MHz, CDCl<sub>3</sub>)  $\delta$  = 160.2, 153.5, 149.2, 139.4, 134.8, 133.6, 129.6, 128.3, 128.0, 127.9, 127.3, 125.9, 123.1, 119.2, 107.4, 55.5, 28.6.

The spectral data are in accordance with those reported in the literature.<sup>17</sup>

### 10-Methyl-5,6-dihydrobenzo[*c*]acridine (**3eaa**)

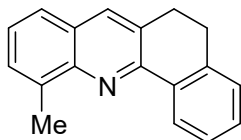

The procedure was followed using [**Fe**] (2.0 mol%, 6.3 mg), *KOt*-Bu (75 mol%, 42 mg), (2-amino-3-methylphenyl)methanol (69 mg, 0.5 mmol) and 1,2,3,4-tetrahydronaphthalen-1-ol (204  $\mu$ L, 1.5 mmol) under 120 °C for 24 h. Purification by column chromatography of silica gel (Petroleum ether/ Ethyl acetate: 15:1), yielded **3eaa** (92%, 113 mg) as white solid.  $^1\text{H}$  NMR (400 MHz,  $\text{CDCl}_3$ )  $\delta$  = 8.56 (d,  $J$  = 7.7 Hz, 1H), 7.77 (s, 1H), 7.48 (d,  $J$  = 8.2 Hz, 1H), 7.40 (d,  $J$  = 7.0 Hz, 1H), 7.34 (t,  $J$  = 7.5 Hz, 1H), 7.29–7.24 (m, 2H), 7.20–7.13 (m, 1H), 3.06–2.94 (m, 2H), 2.91 (dd,  $J$  = 8.4, 5.4 Hz, 2H), 2.81 (s, 3H).  $^{13}\text{C}$  NMR (150 MHz,  $\text{CDCl}_3$ )  $\delta$  = 152.0, 146.5, 139.3, 137.4, 135.2, 133.9, 130.1, 129.5, 128.8, 128.0, 127.8, 127.3, 126.1, 125.9, 124.9, 28.7, 28.5, 18.0.

The spectral data are in accordance with those reported in the literature.<sup>17</sup>

### 7-Methyl-5,6-dihydrobenzo[*c*]acridine (**3haa**)

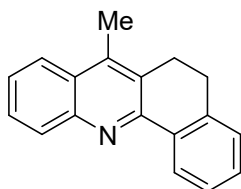

The procedure was followed using [**Fe**] (2.0 mol%, 6.3 mg), *KOt*-Bu (75 mol%, 42 mg), 1-(2-aminophenyl)ethan-1-ol (69 mg, 0.5 mmol) and 1,2,3,4-tetrahydronaphthalen-1-ol (204  $\mu$ L, 1.5 mmol) under 120 °C for 24 h. Purification by column chromatography of silica gel (Petroleum ether/ Ethyl acetate: 15:1), yielded **3haa** (73%, 90 mg) as white solid.  $^1\text{H}$  NMR (600 MHz,  $\text{CDCl}_3$ )  $\delta$  = 8.61 (d,  $J$  = 7.7 Hz, 1H), 8.18 (d,  $J$  = 8.4 Hz, 1H), 8.01 (d,  $J$  = 8.4 Hz, 1H), 7.70–7.67 (m, 1H), 7.59–7.34 (m, 3H), 7.30 (d,  $J$  = 7.5 Hz, 1H), 3.15 (t,  $J$  = 6.9 Hz, 2H), 3.02 (t,  $J$  = 6.9 Hz, 2H), 2.68 (s, 3H).  $^{13}\text{C}$  NMR (100 MHz,  $\text{CDCl}_3$ )  $\delta$  = 152.7, 146.8, 139.8, 139.1, 135.2, 130.2, 129.5, 128.4, 128.3, 127.7, 127.6, 127.3, 126.4, 125.8, 123.7, 28.2, 25.4, 14.0.

The spectral data are in accordance with those reported in the literature.<sup>18</sup>

### 7-Phenyl-5,6-dihydrobenzo[*c*]acridine (**3iaa**)

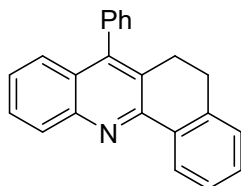

The procedure was followed using [Fe] (2.0 mol%, 6.3 mg), KO*t*-Bu (75 mol%, 42 mg), (2-aminophenyl)(phenyl)methanol (100 mg, 0.5 mmol) and 1,2,3,4-tetrahydronaphthalen-1-ol (204  $\mu$ L, 1.5 mmol) under 120  $^{\circ}$ C for 24 h. Purification by column chromatography of silica gel (Petroleum ether/ Ethyl acetate: 15:1), yielded **3iaa** (52%, 80 mg) as yellow solid.  $^1\text{H}$  NMR (400 MHz,  $\text{CDCl}_3$ )  $\delta$  = 8.62 (d,  $J$  = 7.7 Hz, 1H), 8.17 (d,  $J$  = 8.4 Hz, 1H), 7.63–7.59 (m, 1H), 7.53–7.44 (m, 3H), 7.42–7.38 m, 2H), 7.36–7.31 (m, 2H), 7.30–7.26 (m, 2H), 7.21 (d,  $J$  = 7.2 Hz, 1H), 2.87–2.78 (m, 4H).  $^{13}\text{C}$  NMR (100 MHz,  $\text{CDCl}_3$ )  $\delta$  = 153.2, 147.3, 145.4, 139.3, 137.0, 135.2, 129.68, 129.65, 129.6, 128.6, 128.5, 128.13, 127.94, 127.9, 127.7, 127.3, 126.4, 126.1, 126.0, 28.3, 26.6.

The spectral data are in accordance with those reported in the literature.<sup>19</sup>

## Copies of $^1\text{H}$ and $^{13}\text{C}$ Spectra

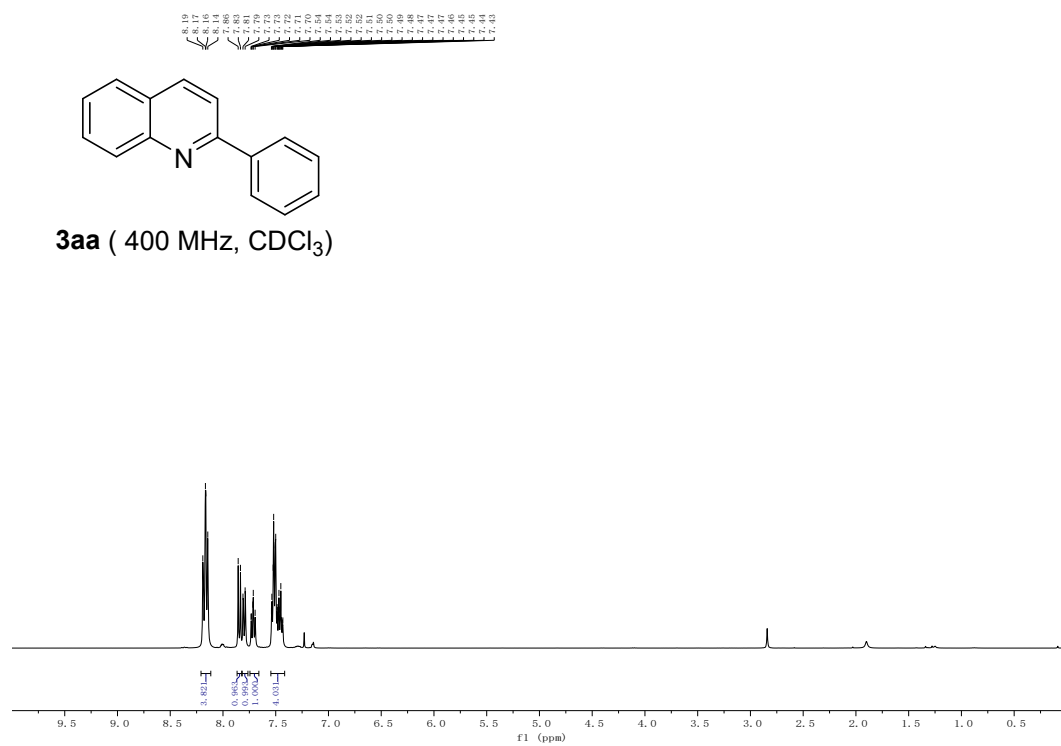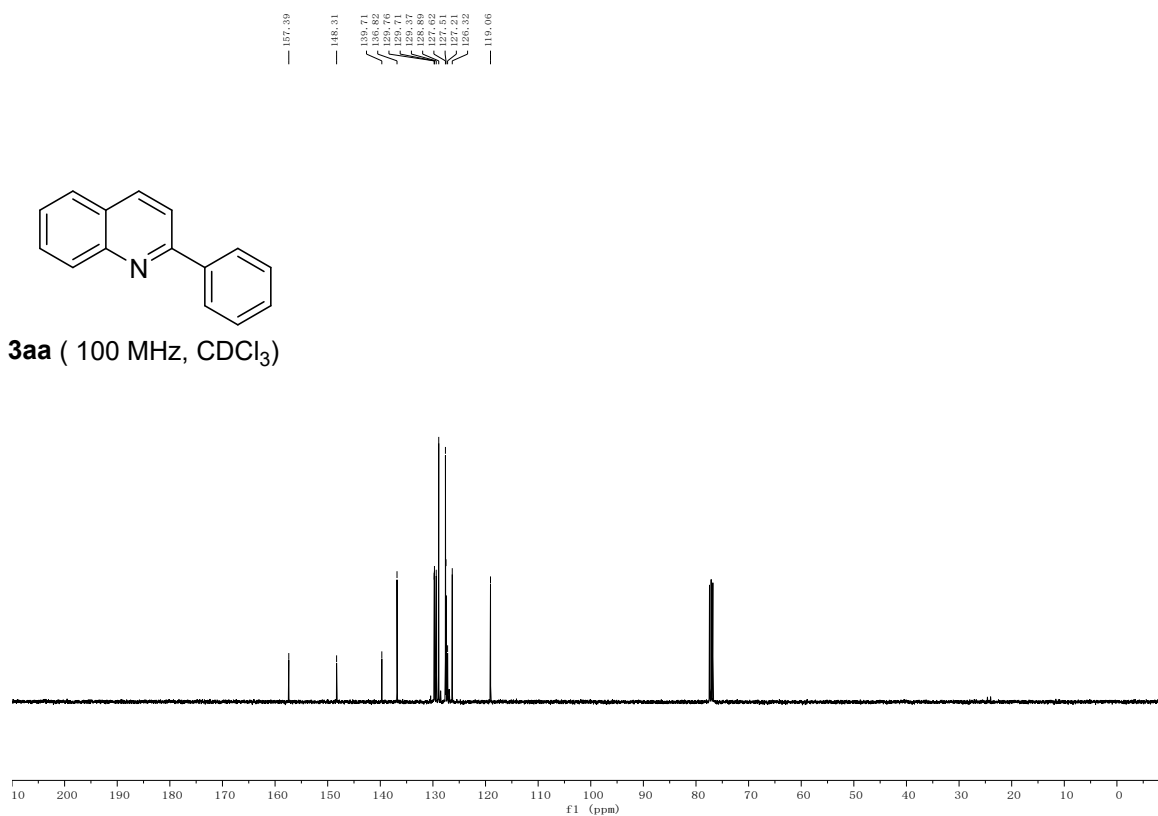



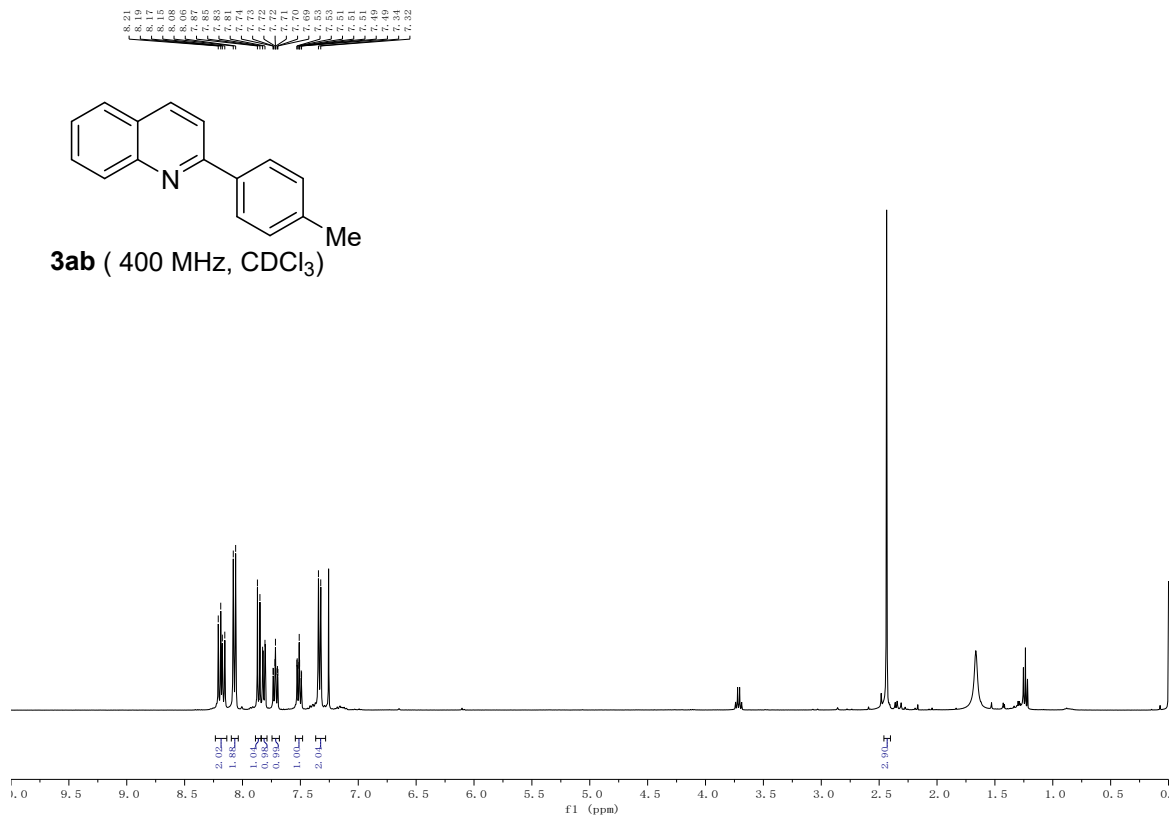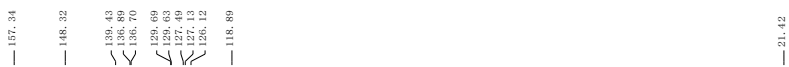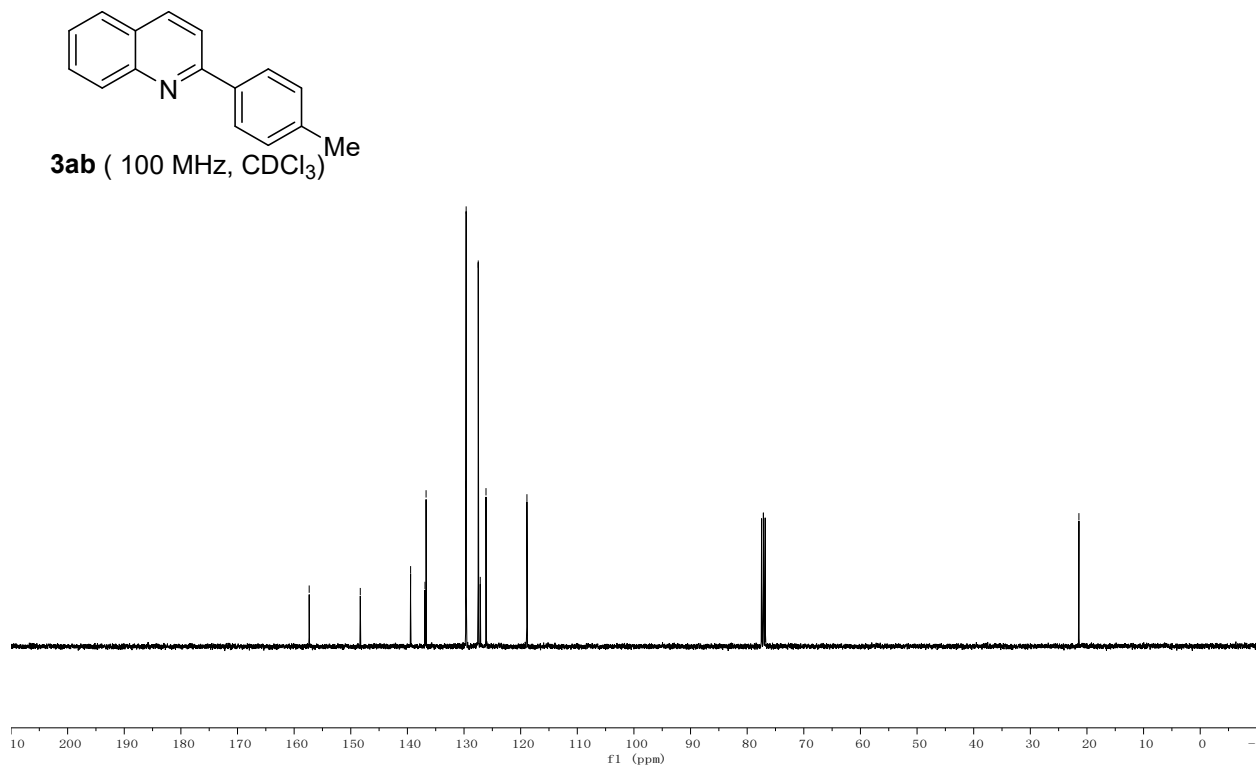

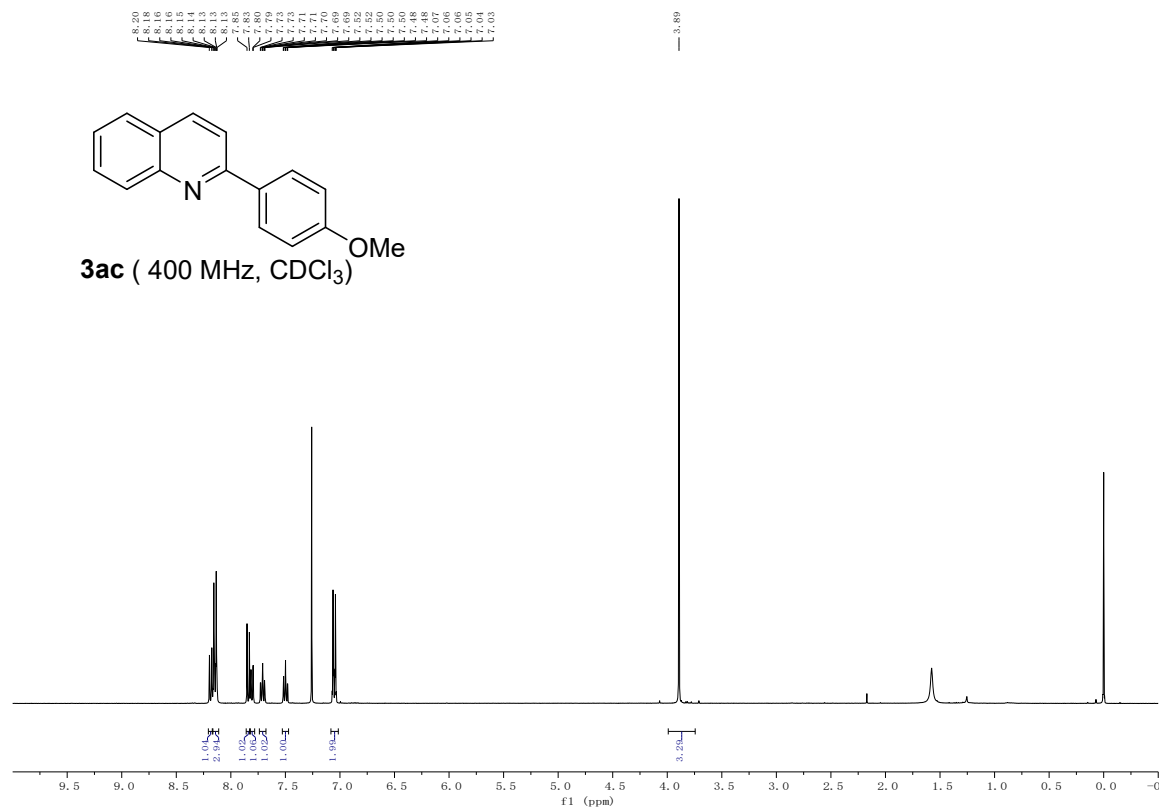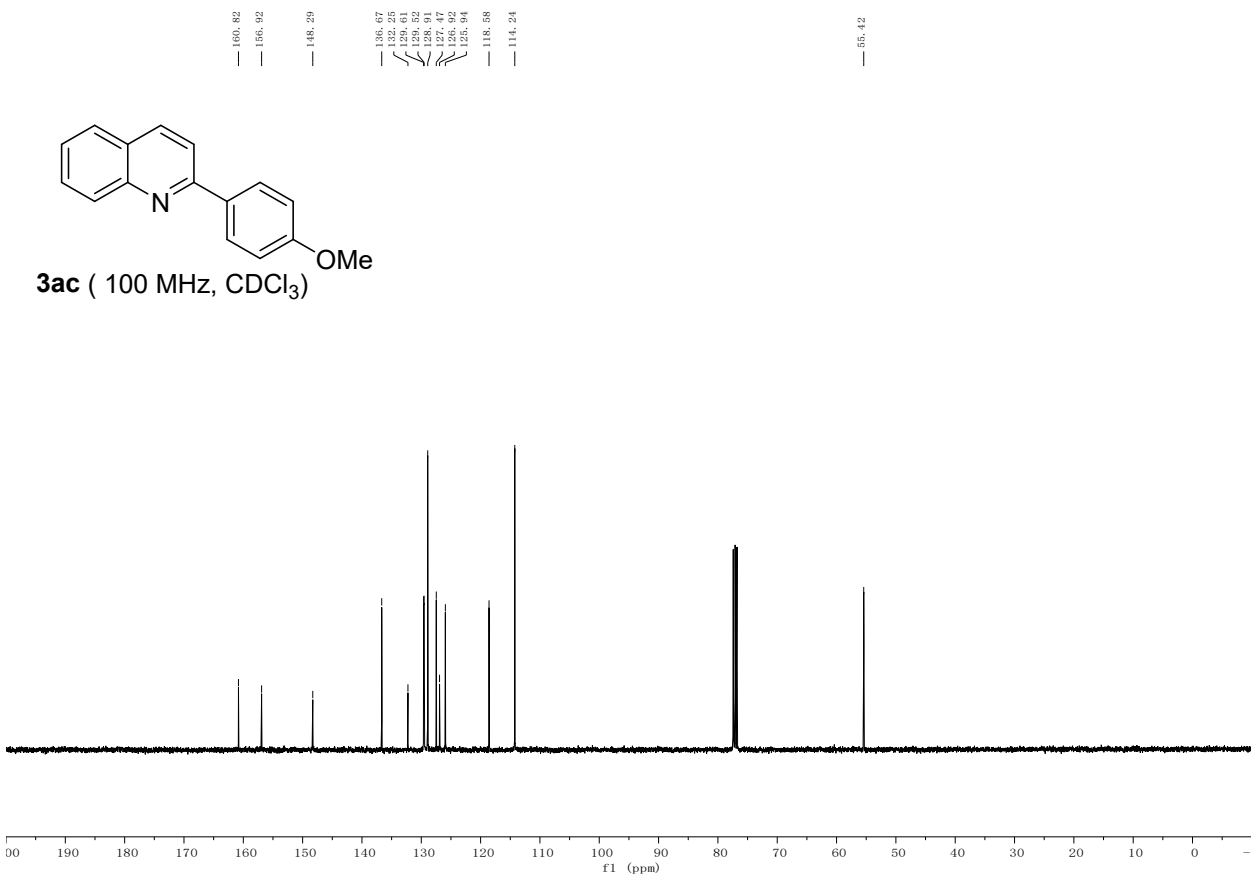

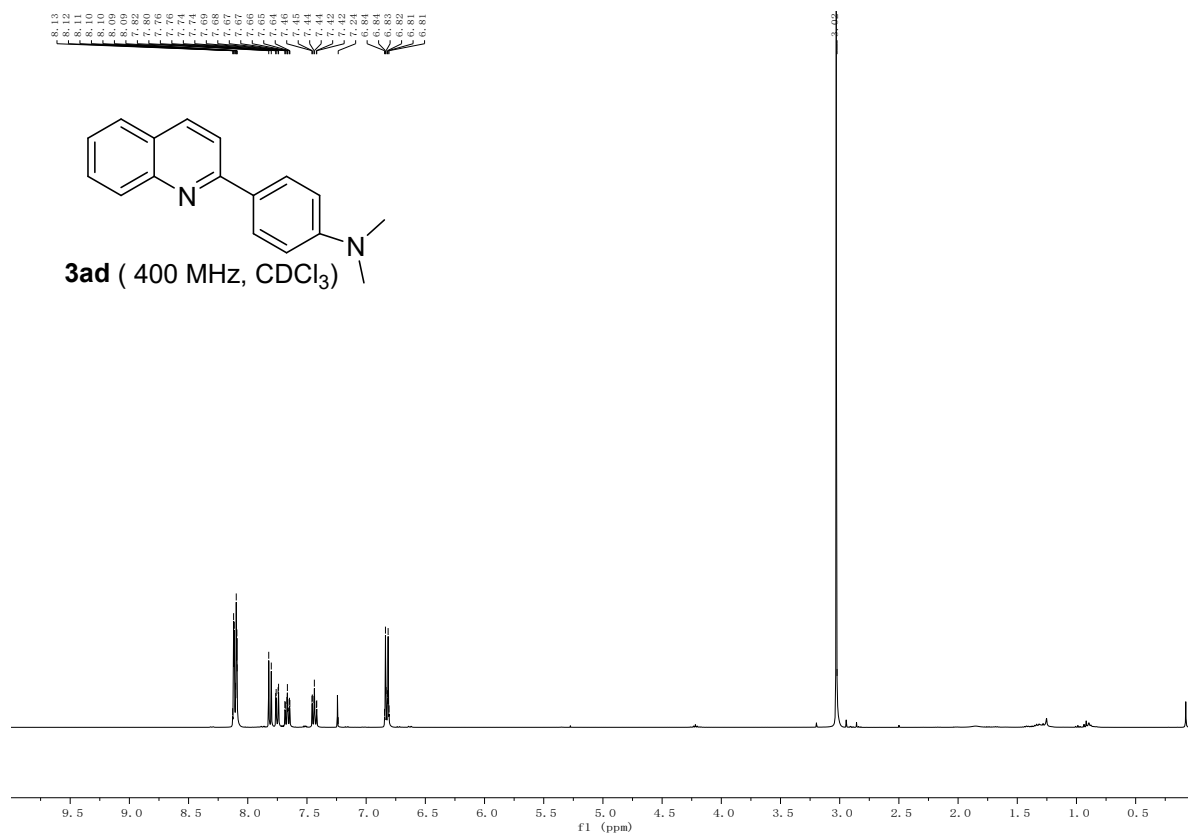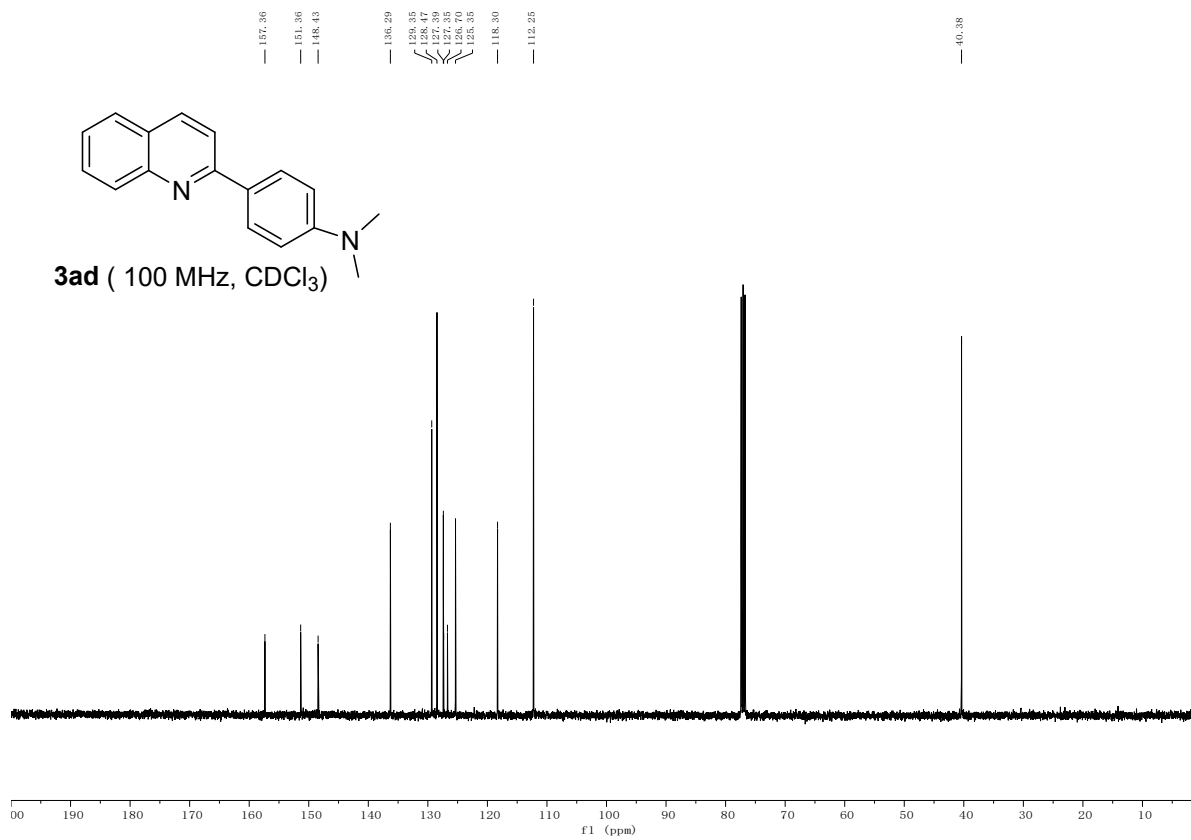

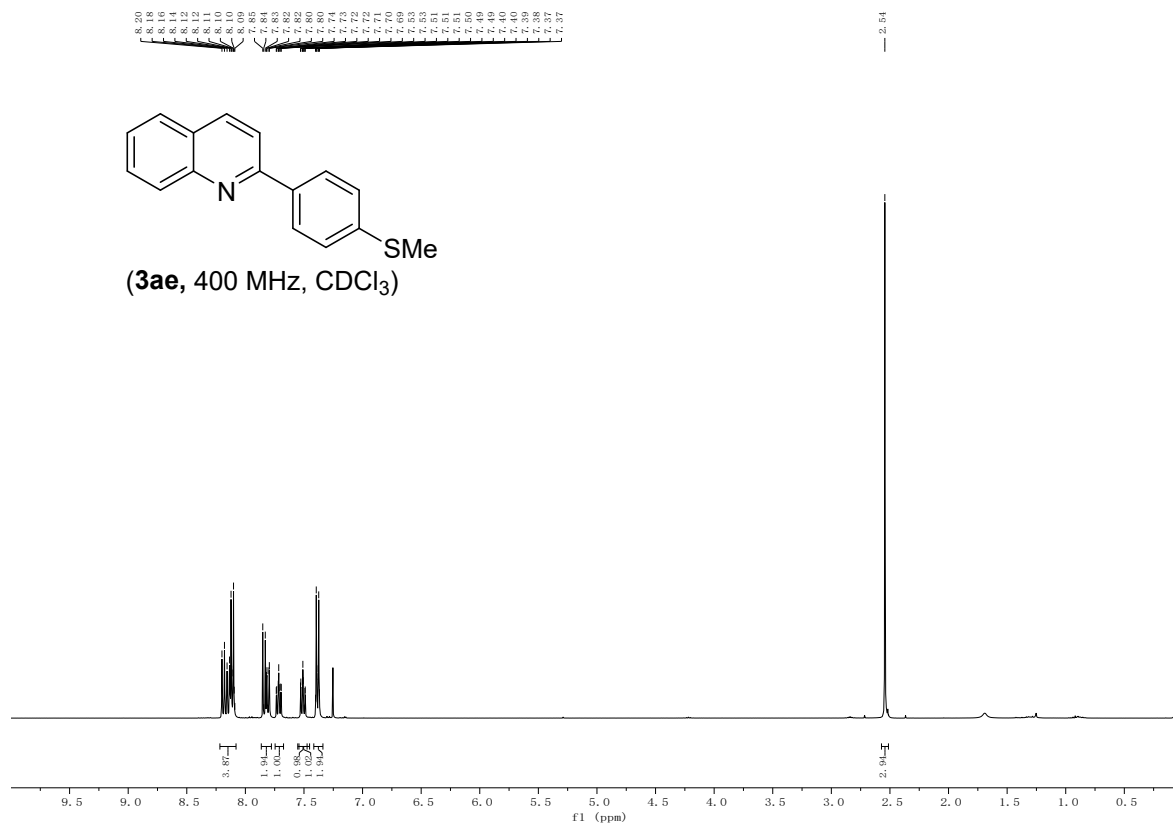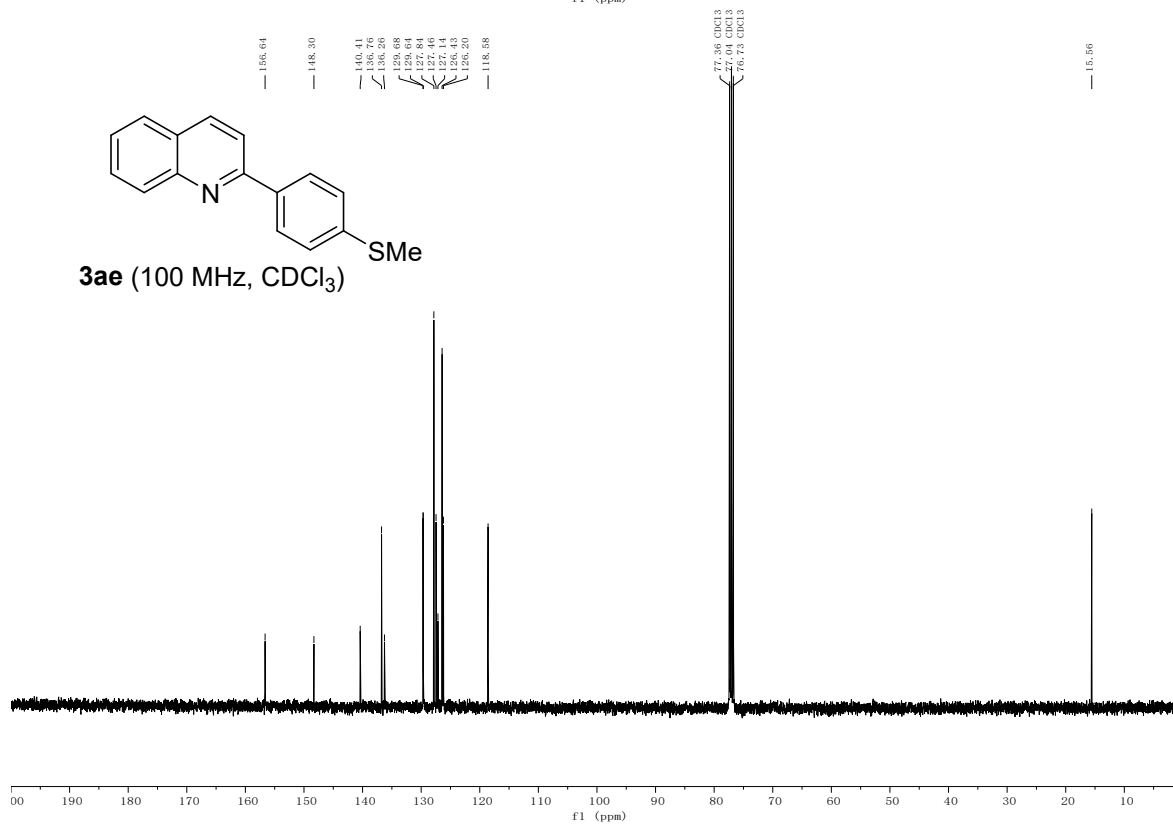

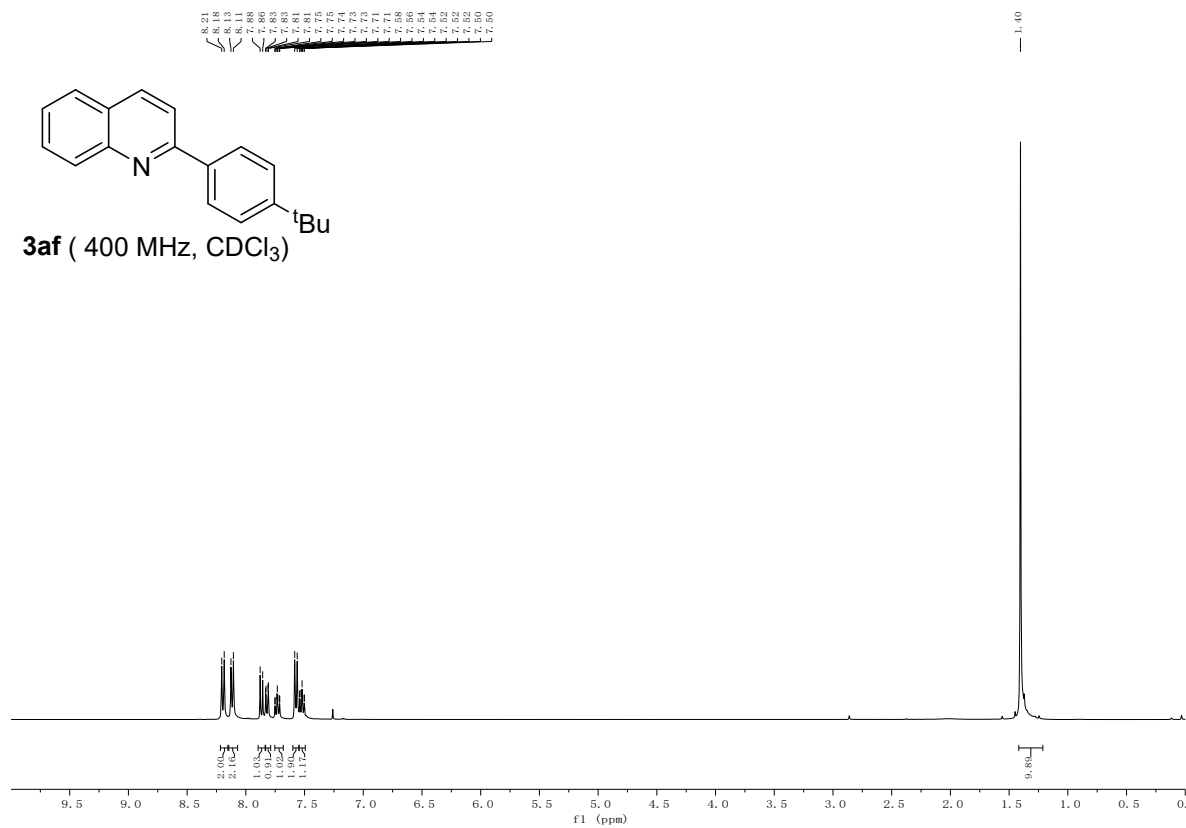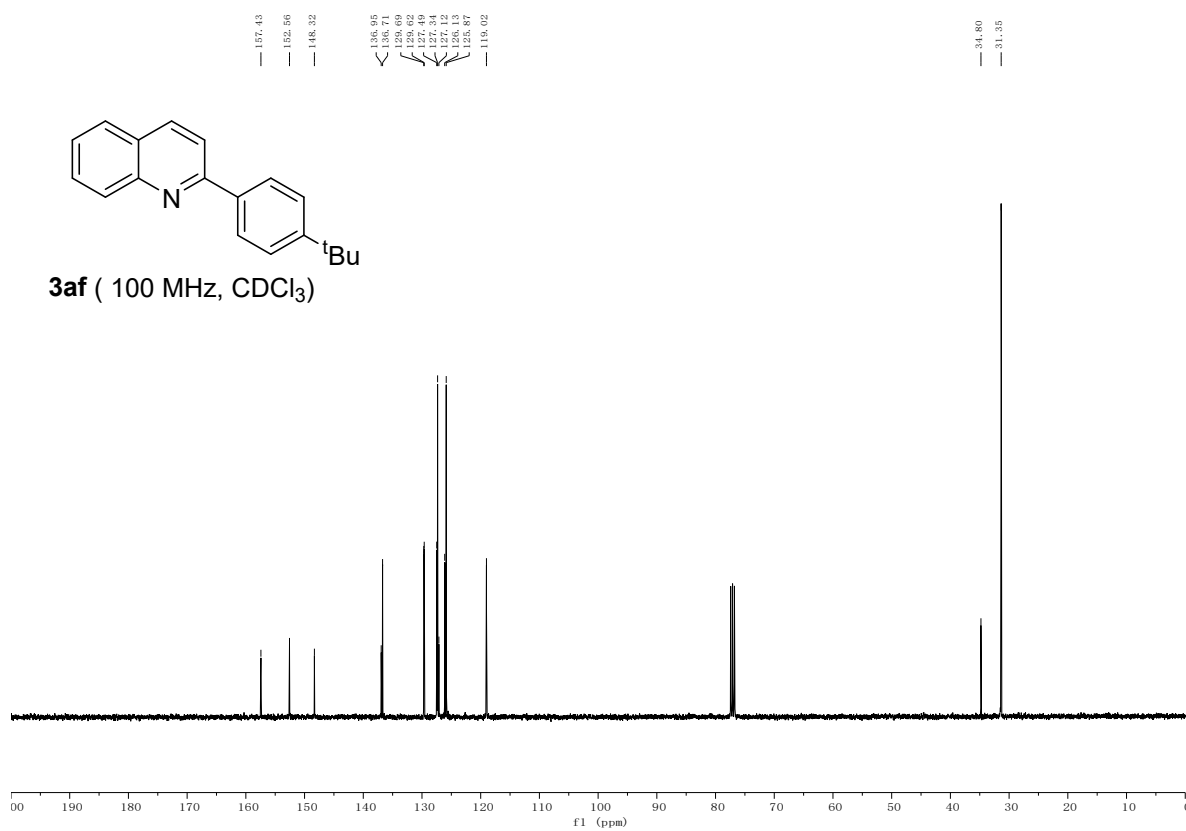

8.29  
8.28  
8.28  
8.27  
8.23  
8.22  
7.97  
7.95  
7.88  
7.86  
7.81  
7.81  
7.80  
7.79  
7.79  
7.78  
7.78  
7.77  
7.77  
7.77  
7.76  
7.76  
7.72  
7.72  
7.71  
7.71  
7.70  
7.61  
7.60  
7.59  
7.58  
7.58  
7.57  
7.57  
7.57  
7.56  
7.56  
7.55  
7.52  
7.51  
7.50  
7.50  
7.43  
7.41  
7.40

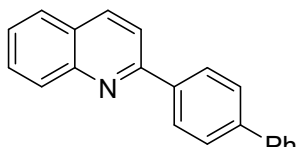

**3ag** ( 600 MHz, CDCl<sub>3</sub>)

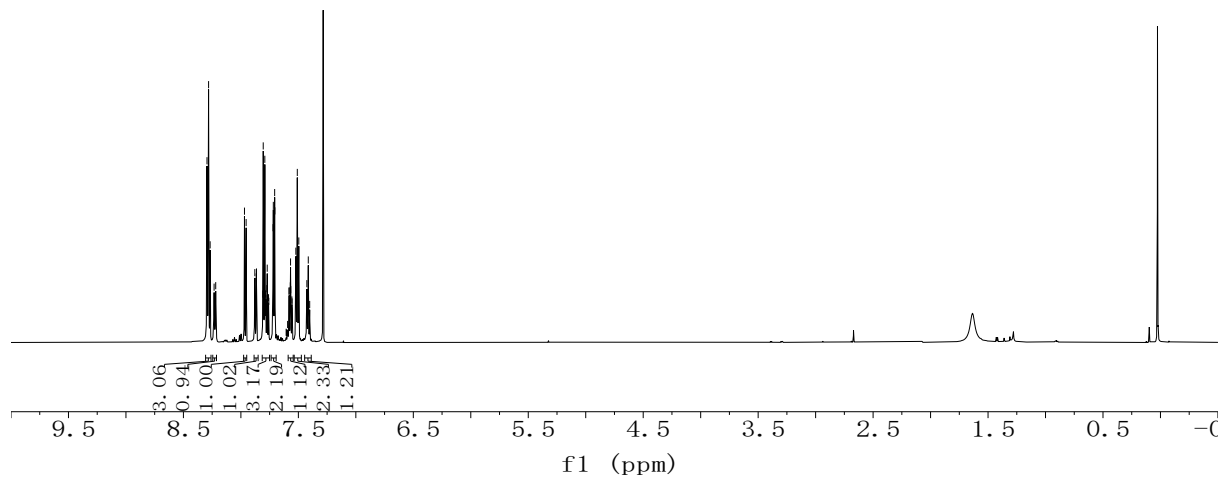

156.94  
148.31  
142.53  
138.50  
136.89  
135.68  
129.69  
128.89  
128.02  
127.69  
127.24  
127.05  
126.35  
118.97

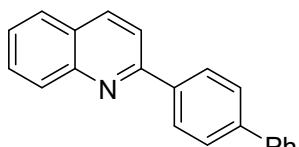

**3ag** ( 100 MHz, CDCl<sub>3</sub>)

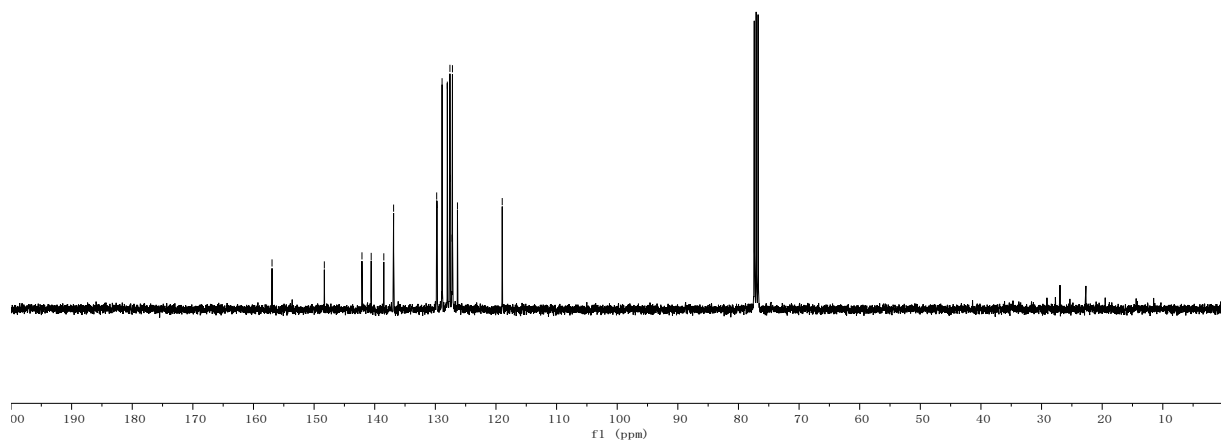

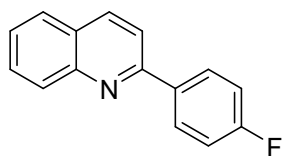

**3ah** (400 MHz, CDCl<sub>3</sub>)

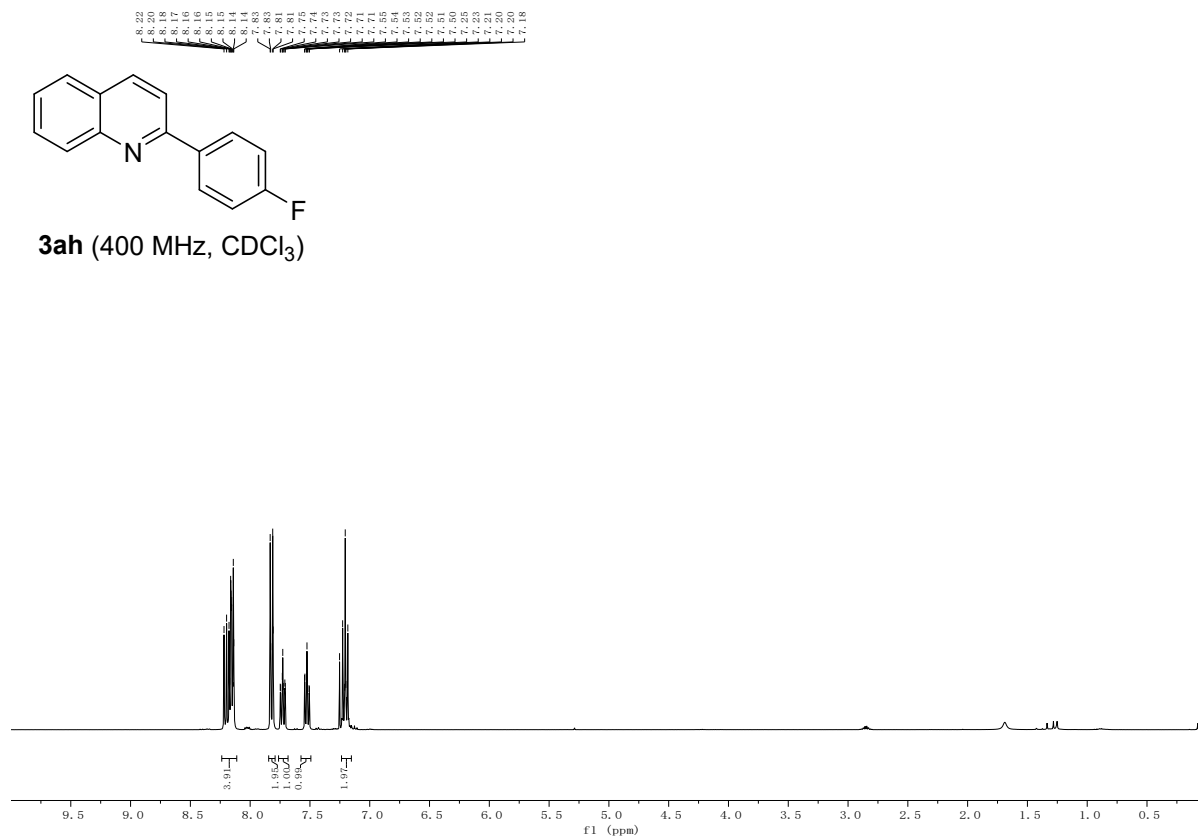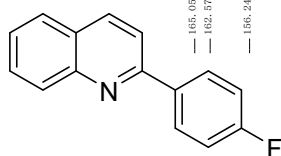

**3ah** (100 MHz, CDCl<sub>3</sub>)

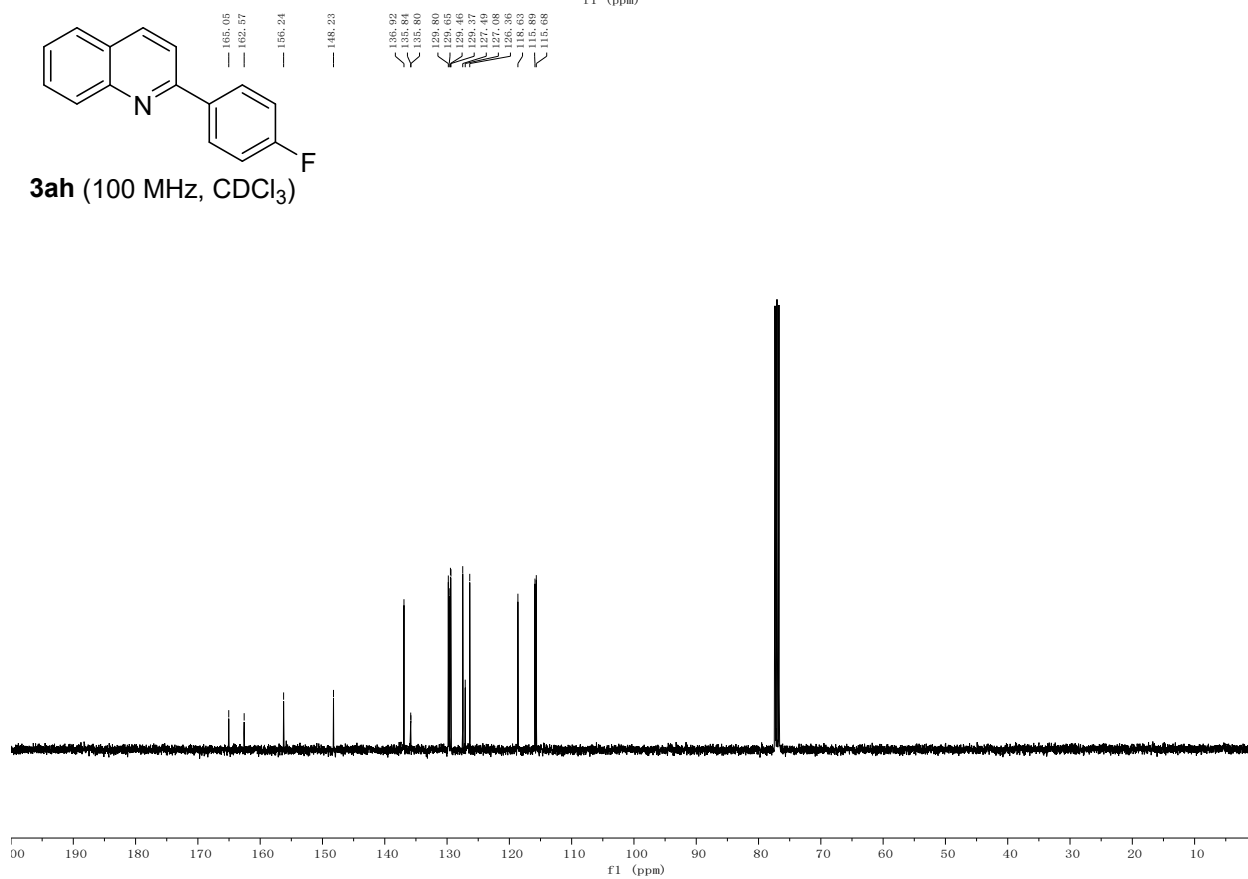

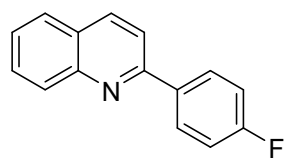

**3ah** (376 MHz, CDCl<sub>3</sub>)

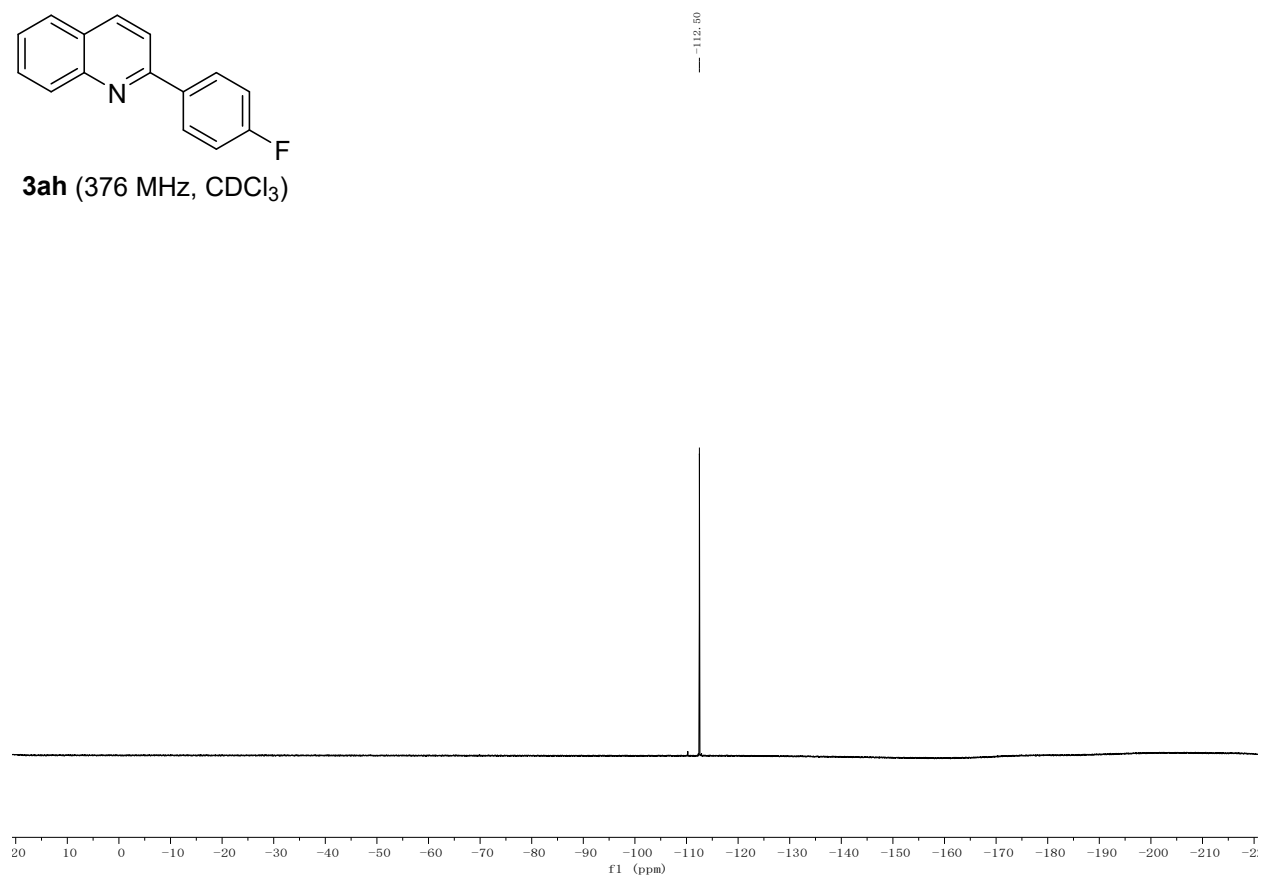



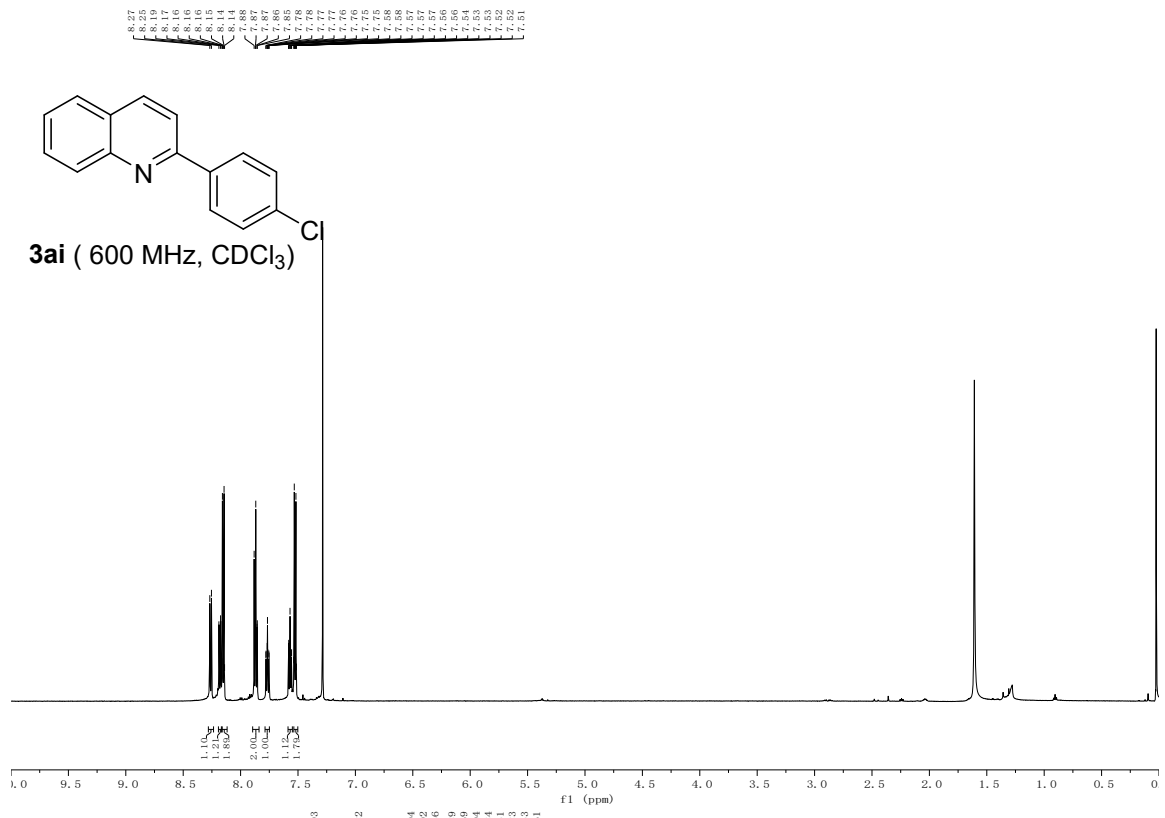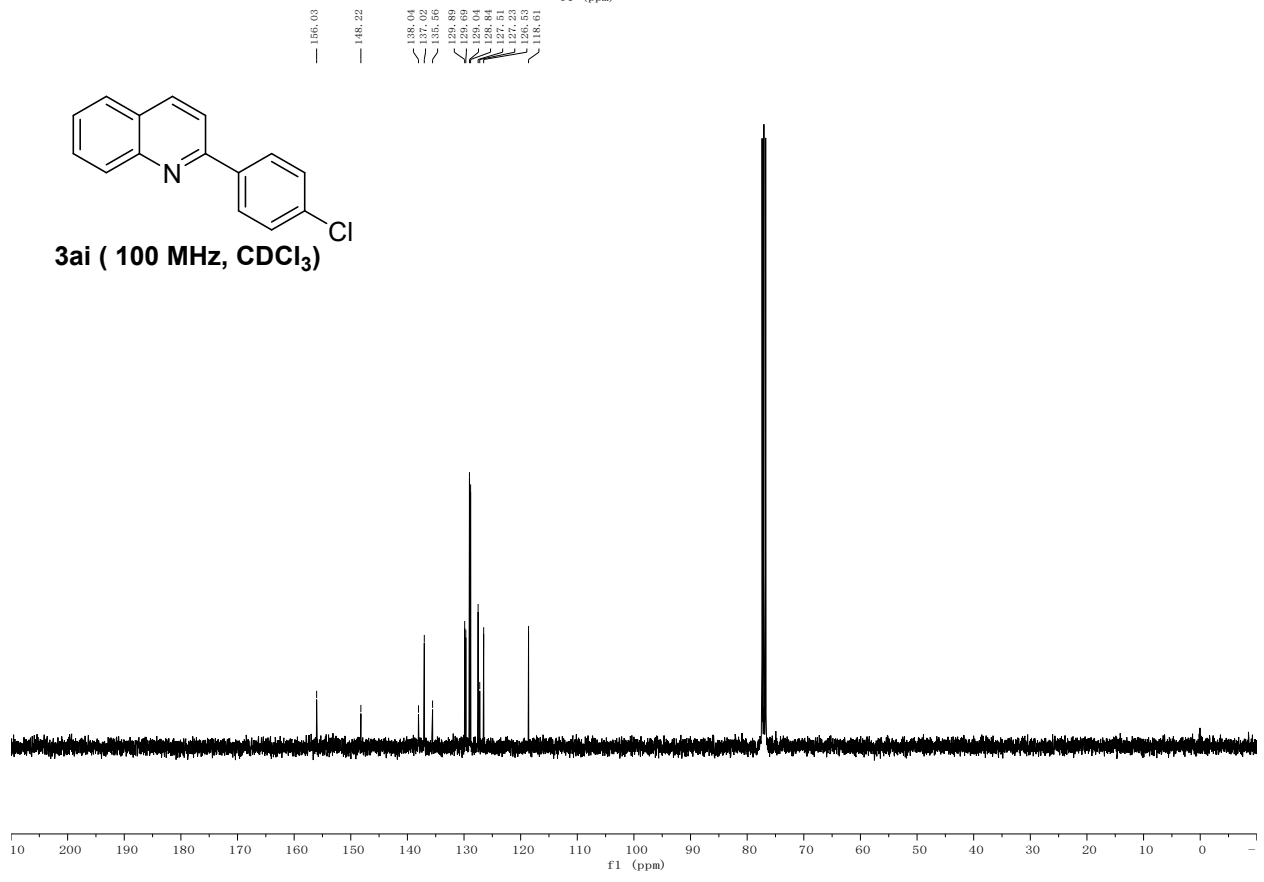

8.228  
8.221  
8.211  
8.195  
8.184  
8.174  
8.164  
8.154  
8.144  
8.134  
8.124  
8.114  
8.104  
8.094  
8.084  
8.074  
8.064  
8.054  
8.044  
8.034  
8.024  
8.014  
7.994  
7.984  
7.974  
7.964  
7.954  
7.944  
7.934  
7.924  
7.914  
7.904  
7.894  
7.884  
7.874  
7.864  
7.854  
7.844  
7.834  
7.824  
7.814  
7.804  
7.794  
7.784  
7.774  
7.764  
7.754  
7.744  
7.734  
7.724  
7.714  
7.704  
7.694  
7.684  
7.674  
7.664  
7.654  
7.644  
7.634  
7.624  
7.614  
7.604  
7.594  
7.584  
7.574  
7.564  
7.554  
7.544  
7.534  
7.524

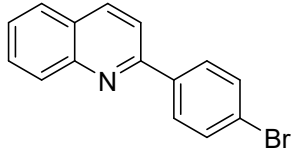

**3aj** ( 400 MHz, CDCl<sub>3</sub>)

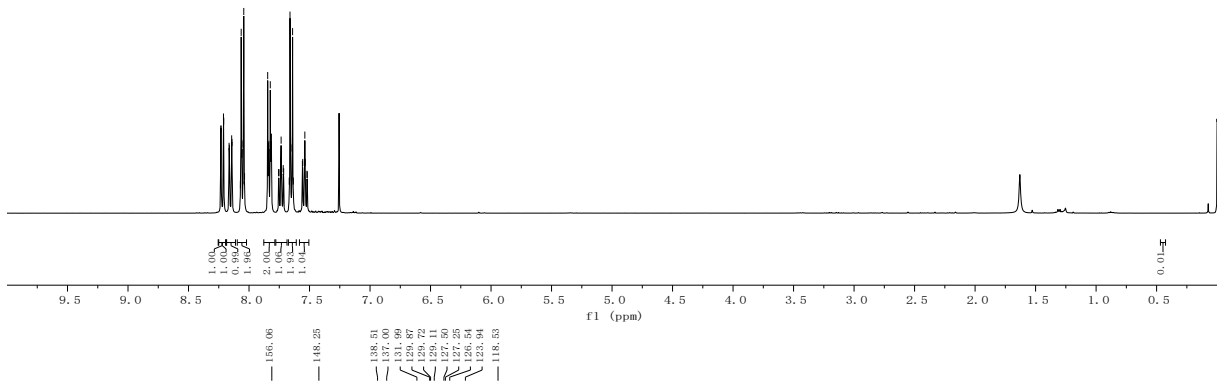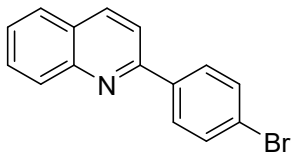

**3aj** ( 100 MHz, CDCl<sub>3</sub>)

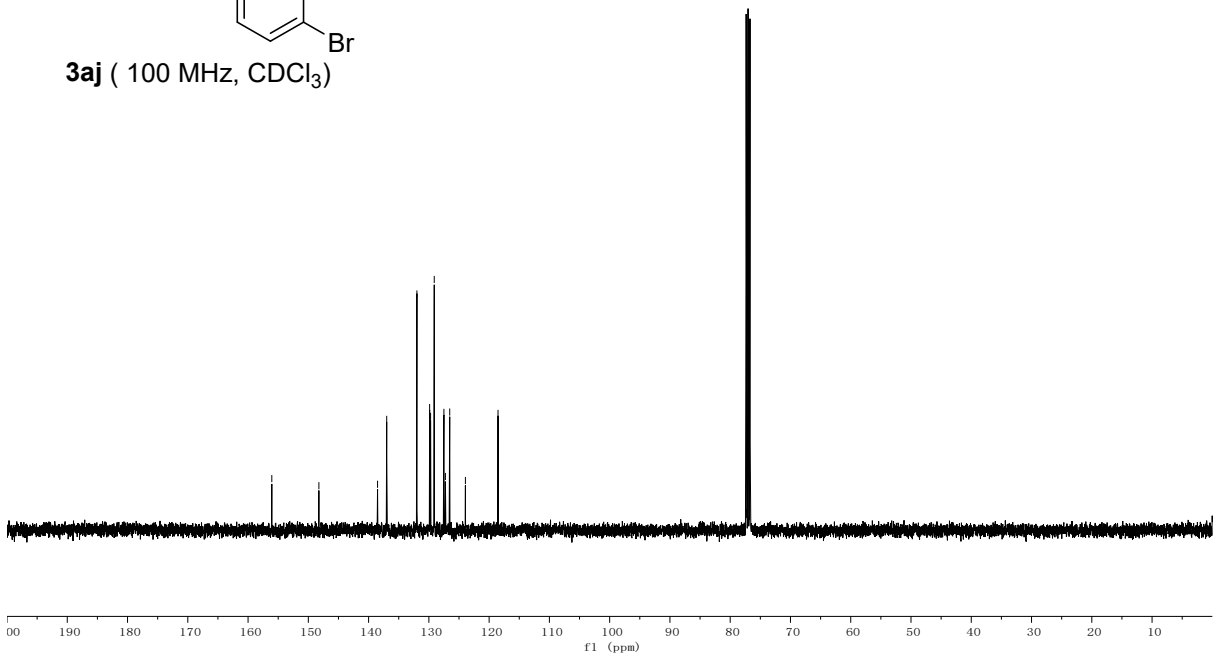

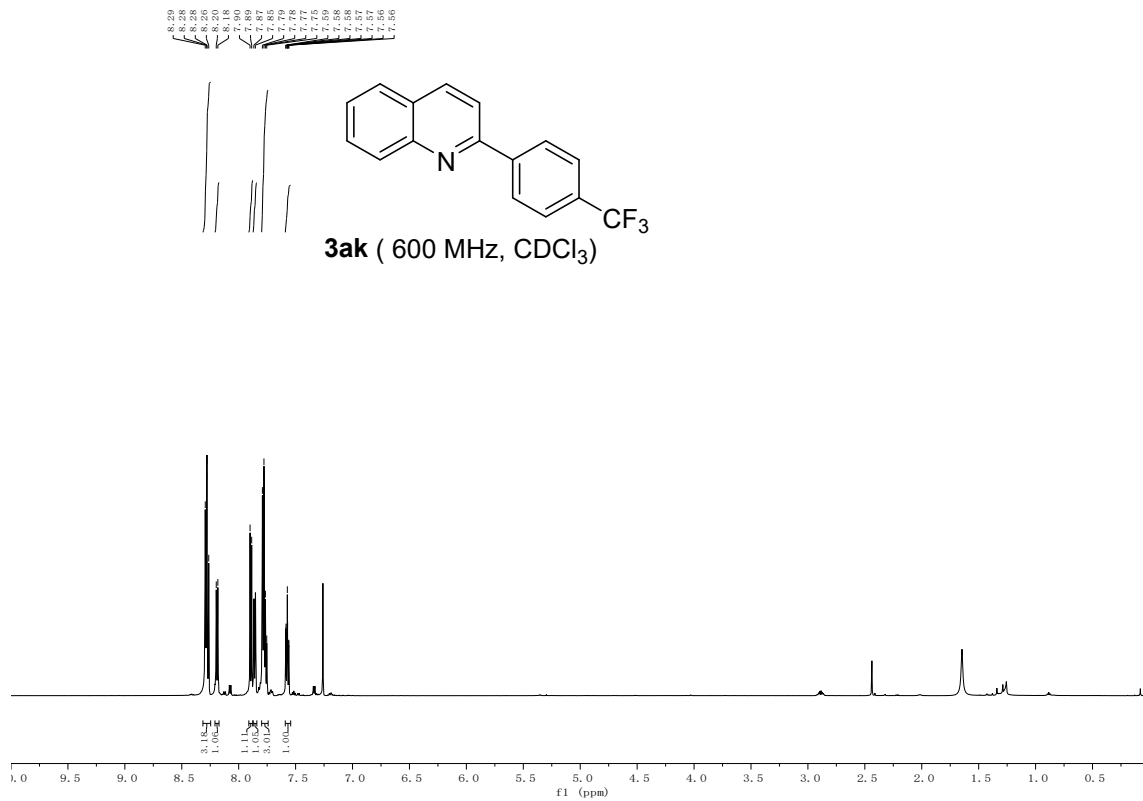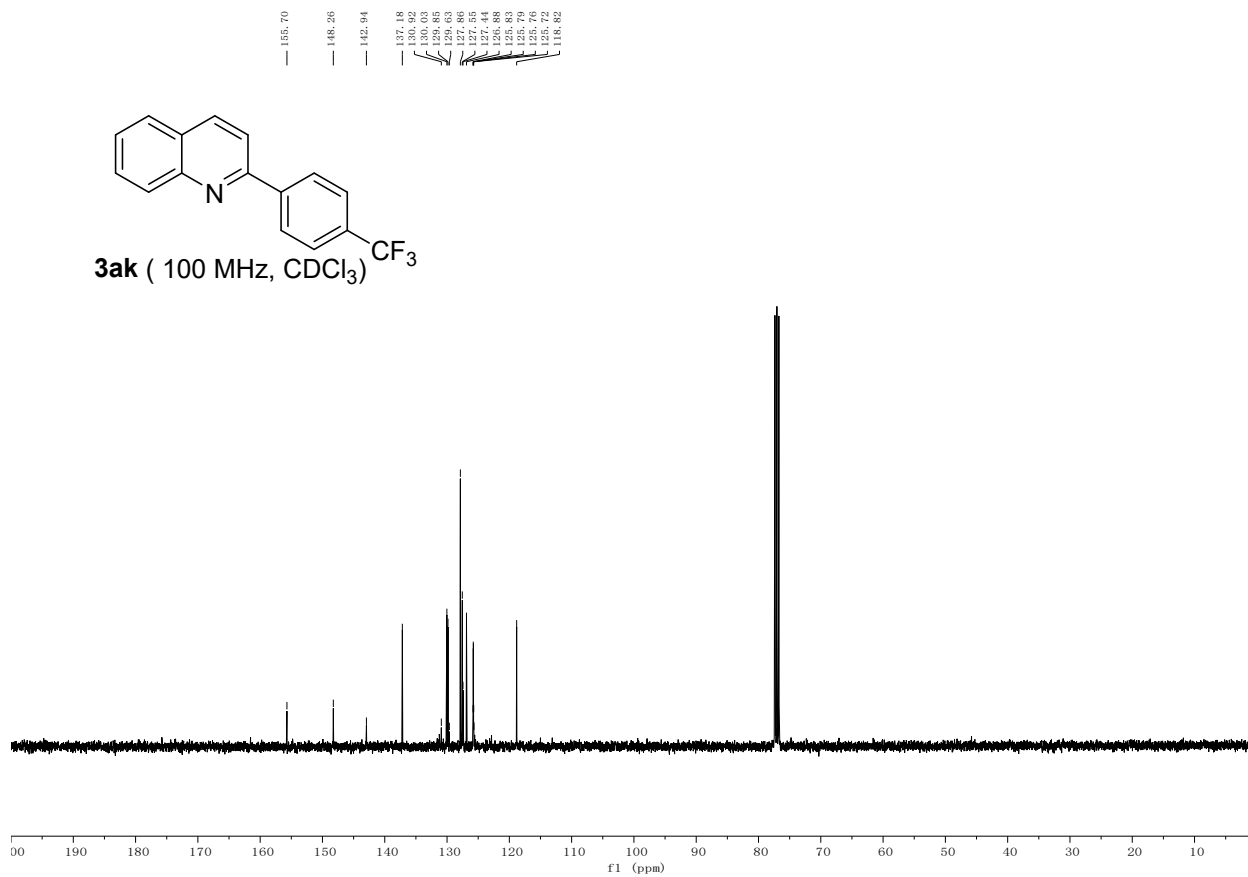

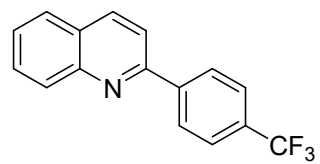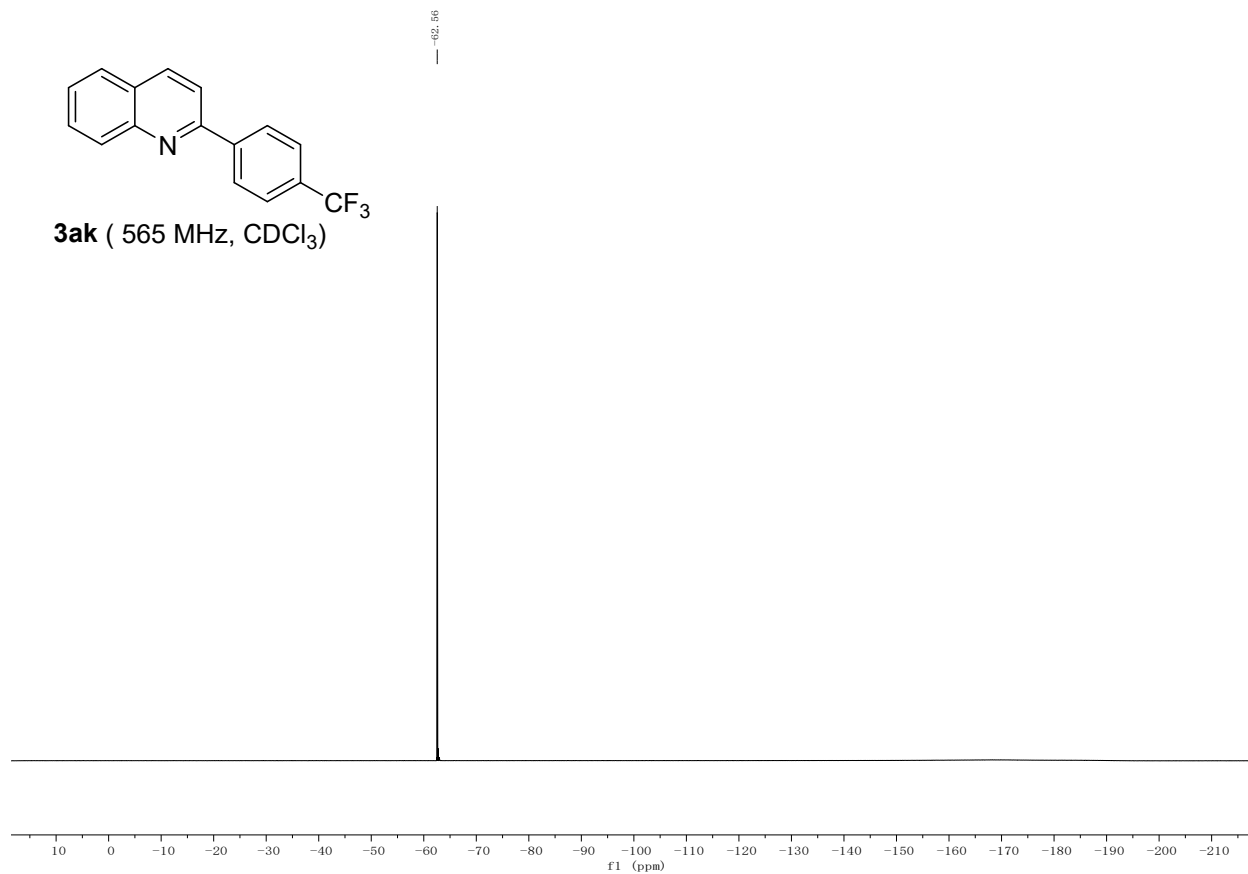

8.24  
8.22  
8.22  
8.20  
8.20  
8.19  
8.19  
8.17  
8.04  
8.03  
8.02  
8.01  
7.82  
7.78  
7.76  
7.75  
7.74  
7.74  
7.73  
7.72  
7.65  
7.65  
7.63  
7.45  
7.44  
7.44

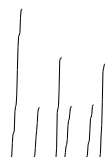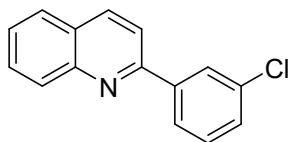

**3aI** ( 400 MHz, CDCl<sub>3</sub>)

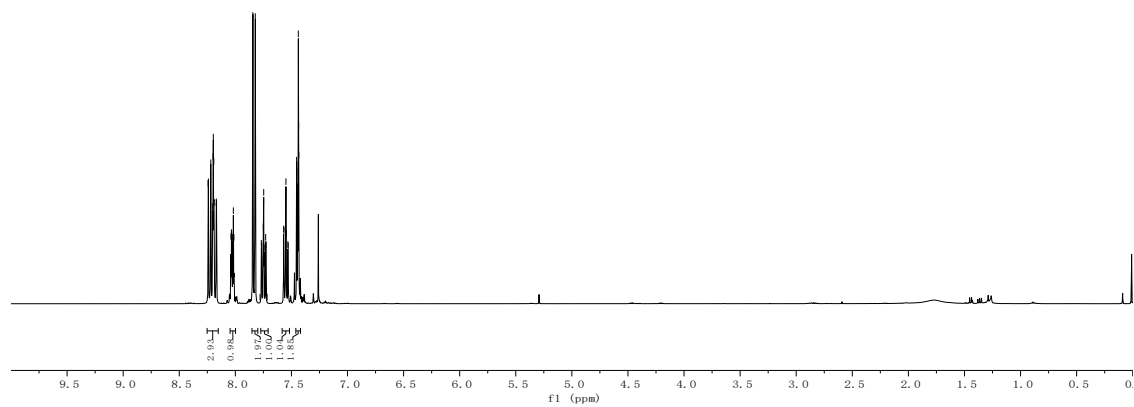

155.77  
148.17  
141.40  
137.10  
136.97  
136.05  
129.73  
129.73  
127.75  
127.53  
127.38  
126.69  
118.75

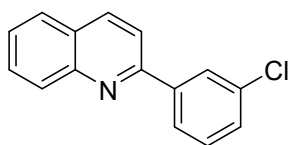

**3aI** ( 100 MHz, CDCl<sub>3</sub>)

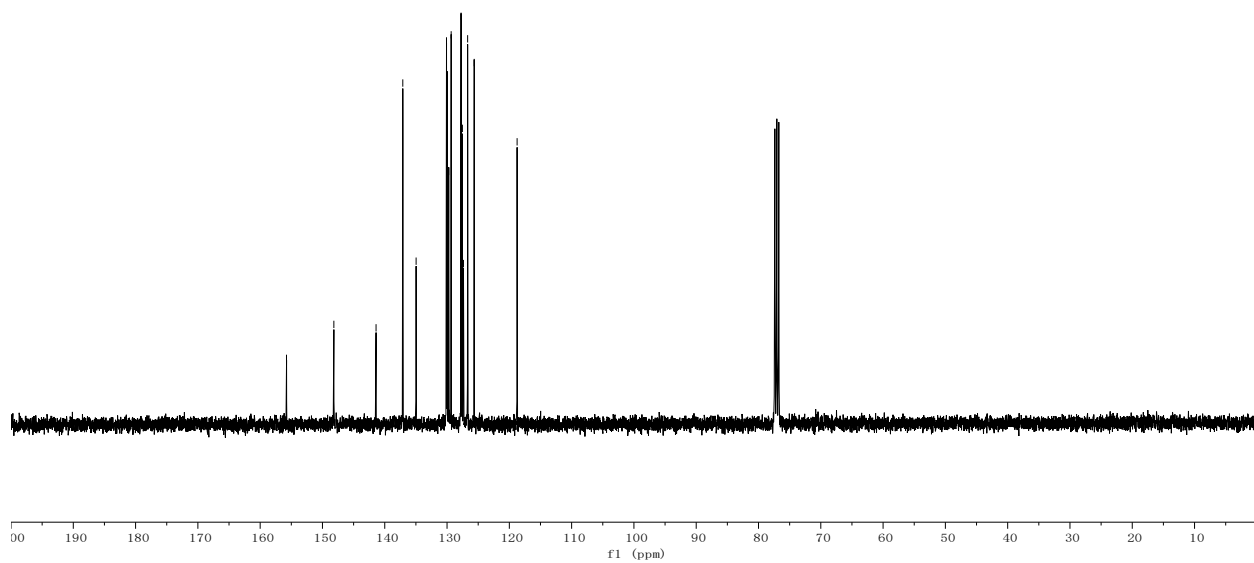

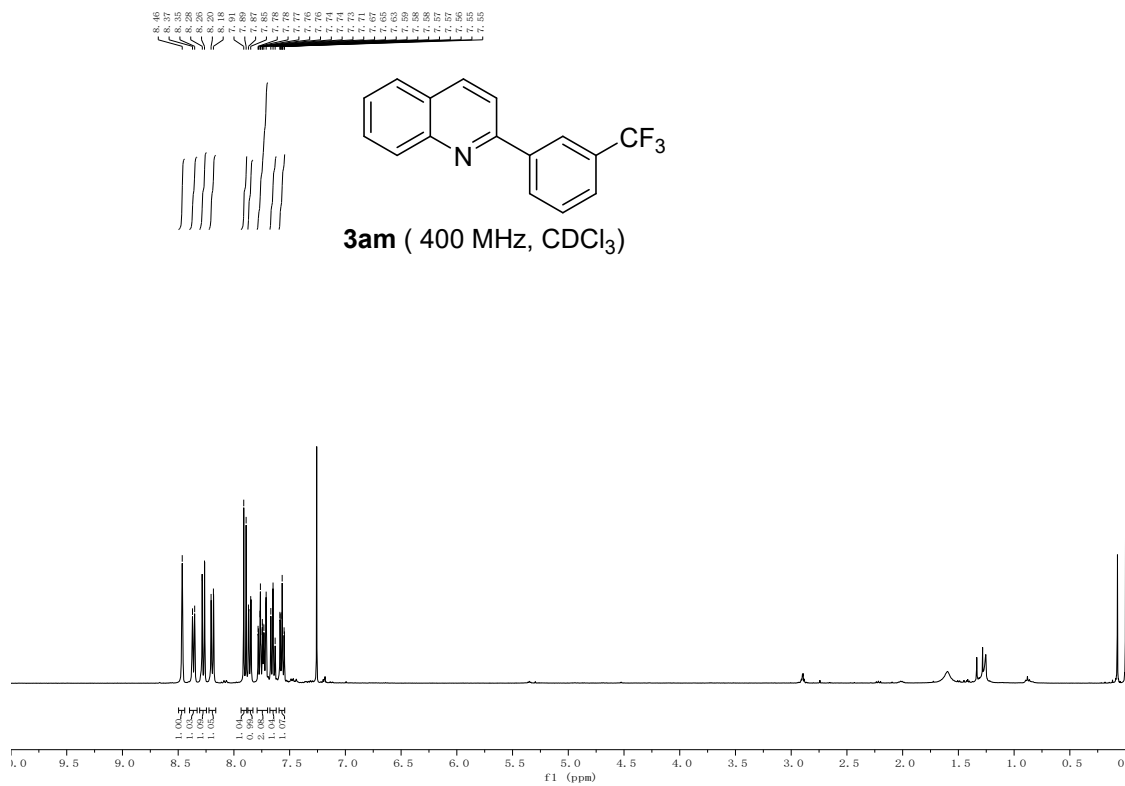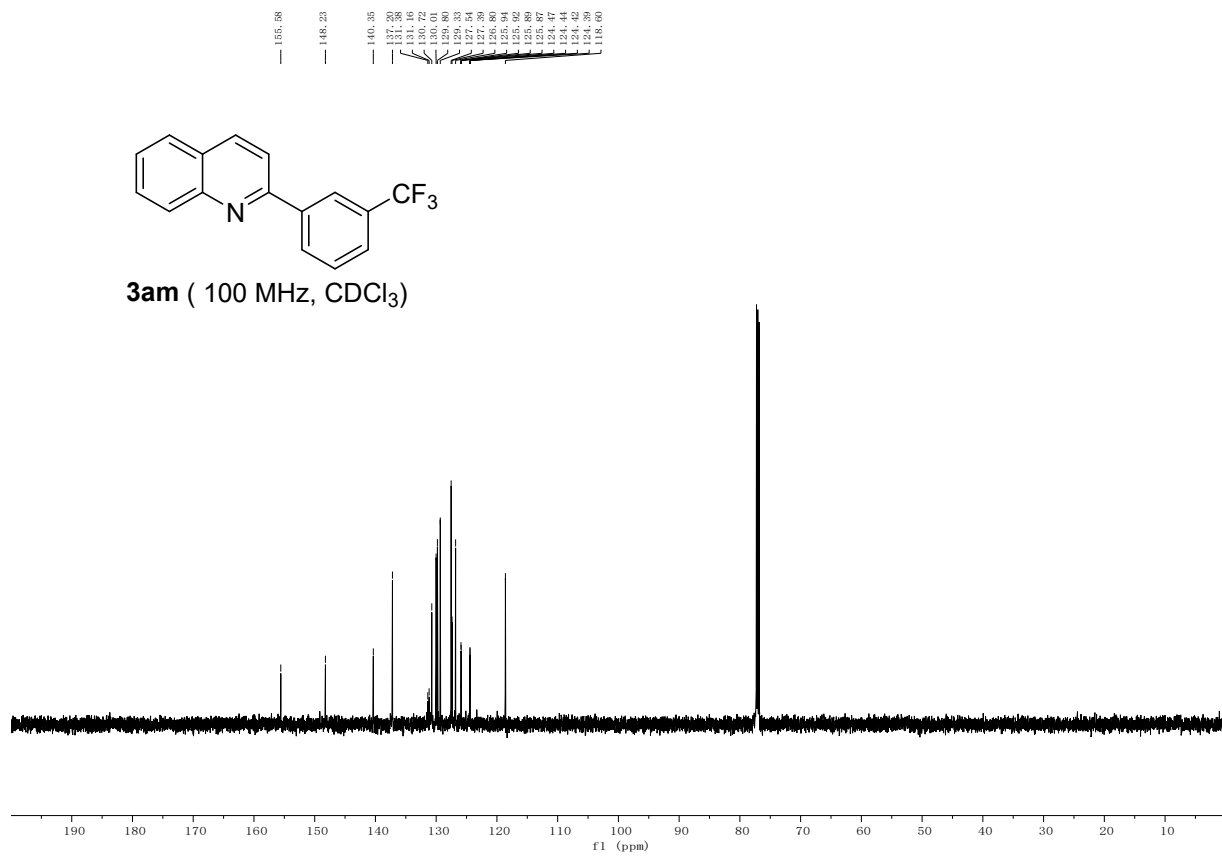

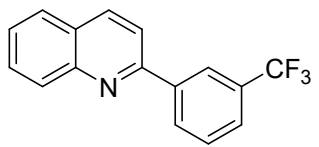

**3am** ( 565MHz, CDCl<sub>3</sub>)

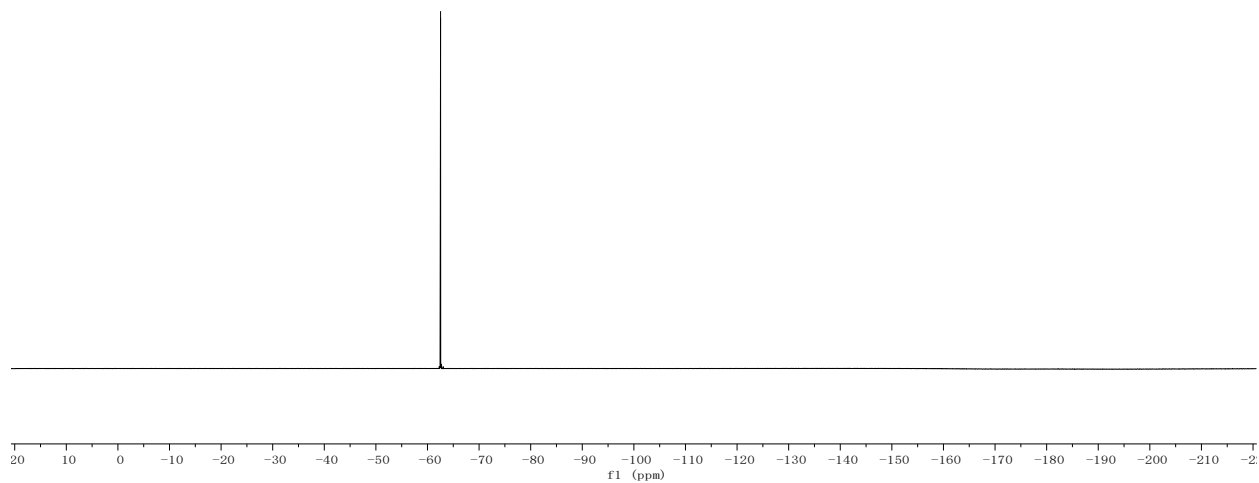

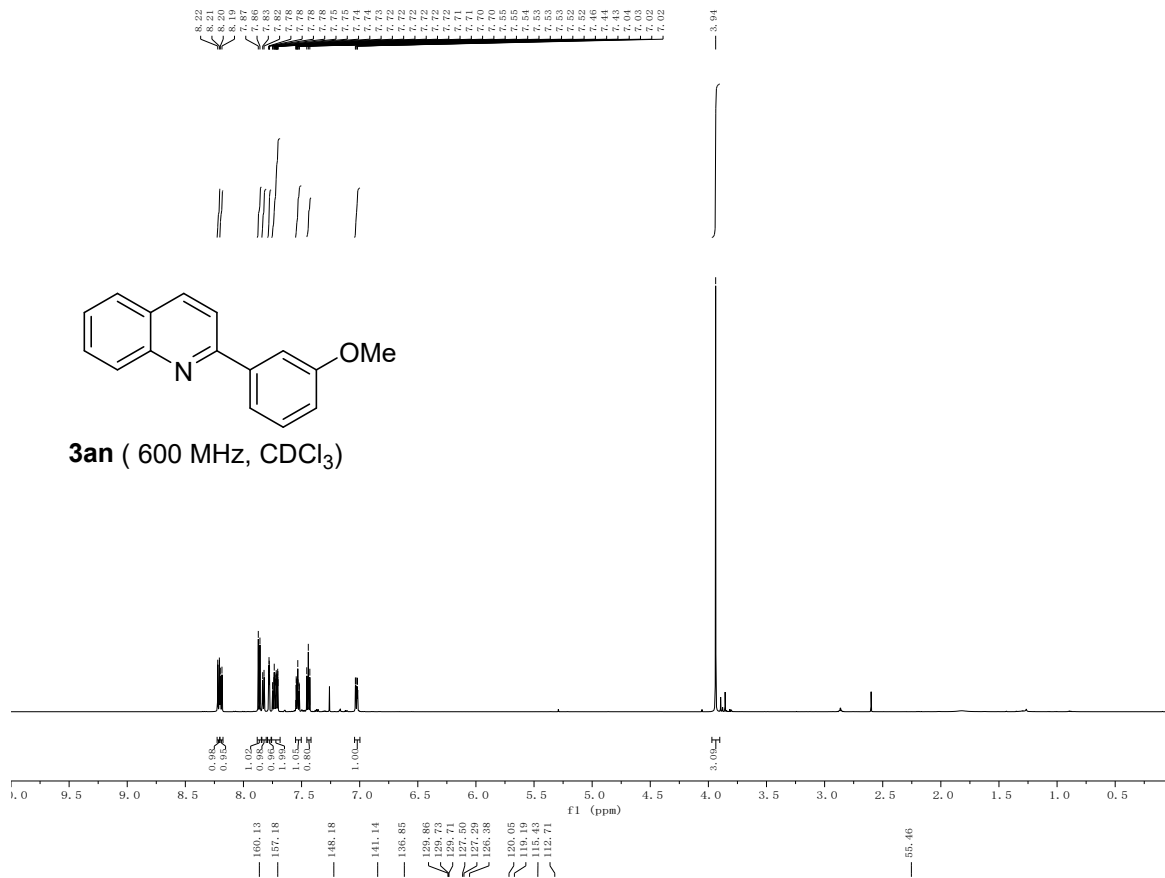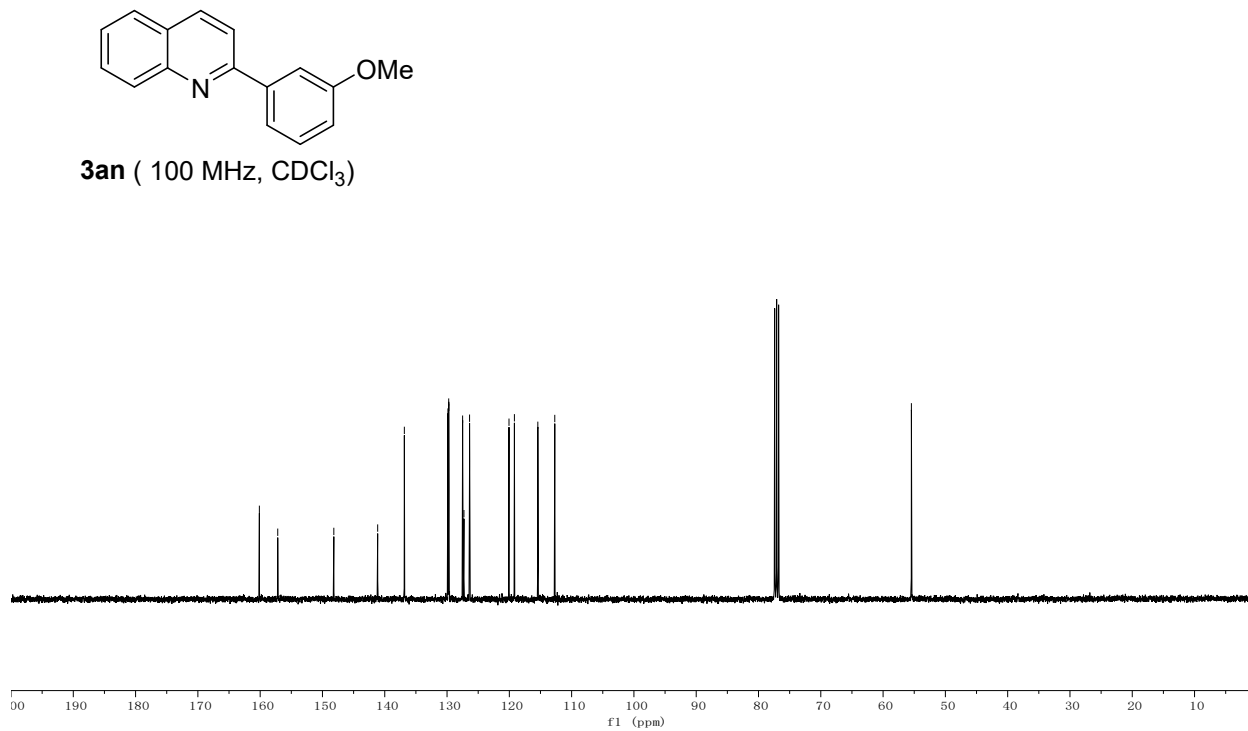



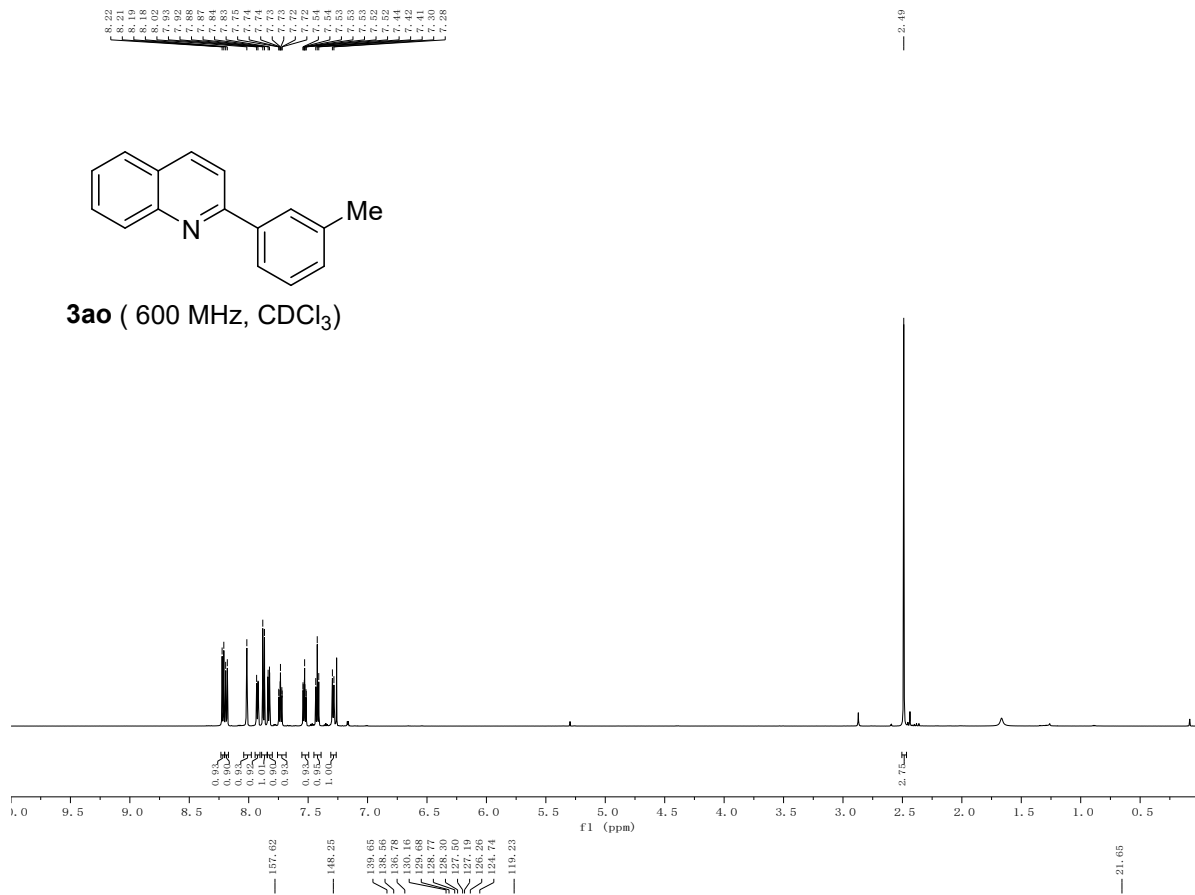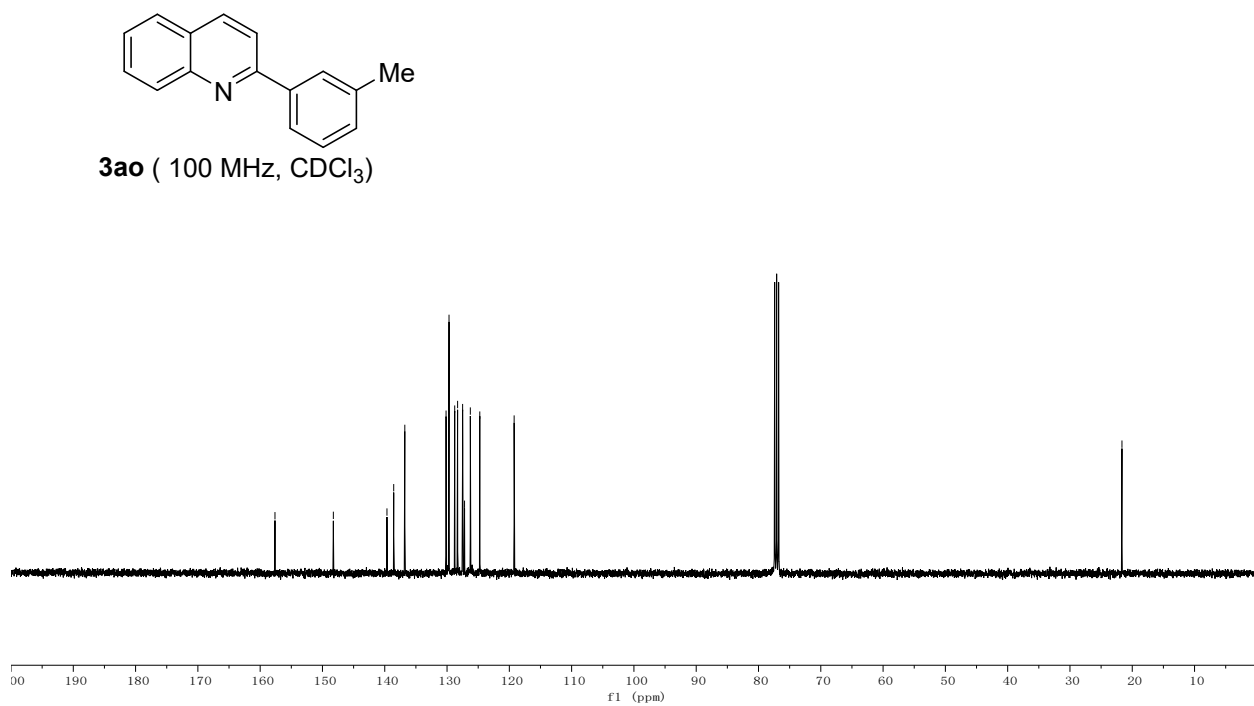

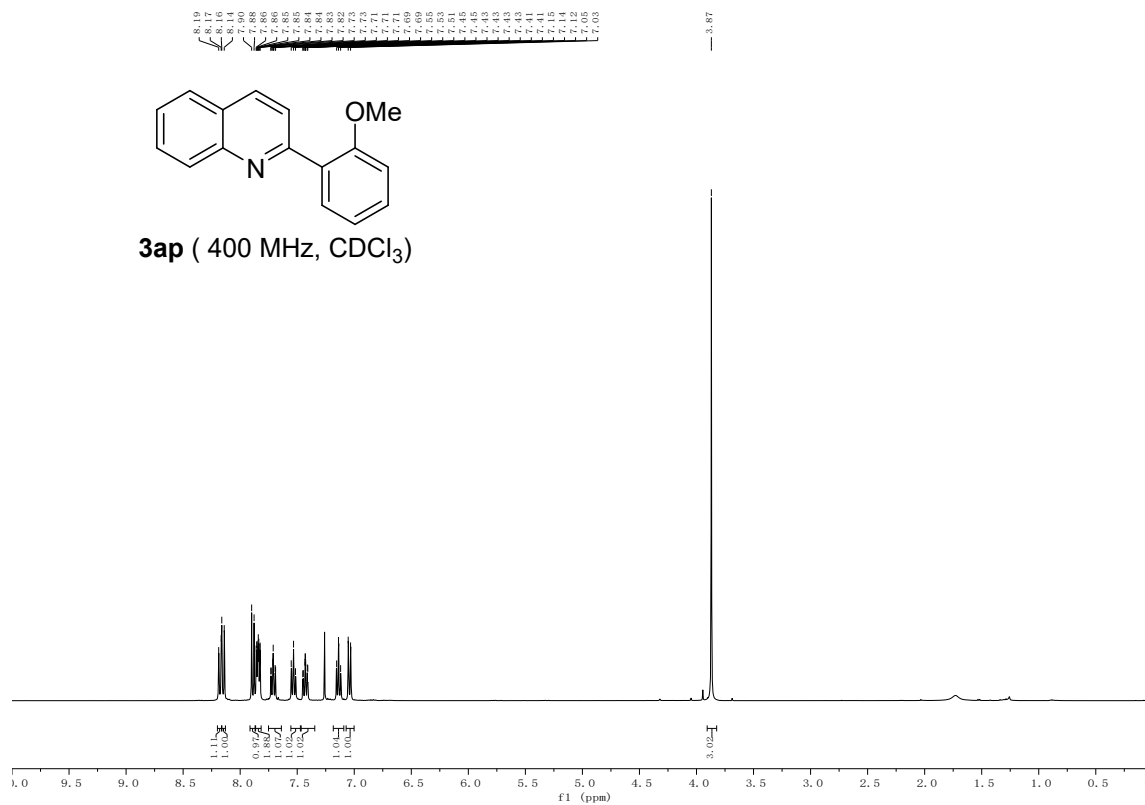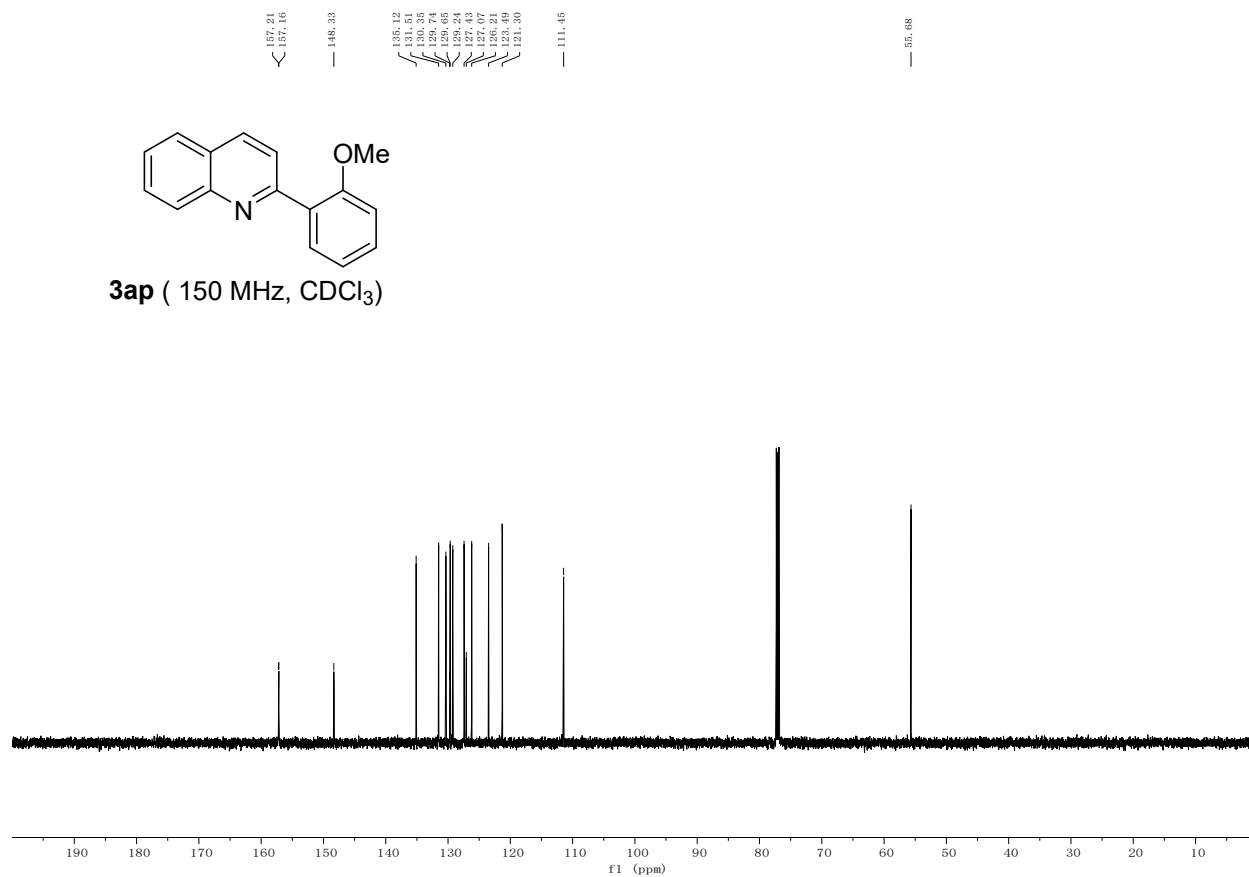

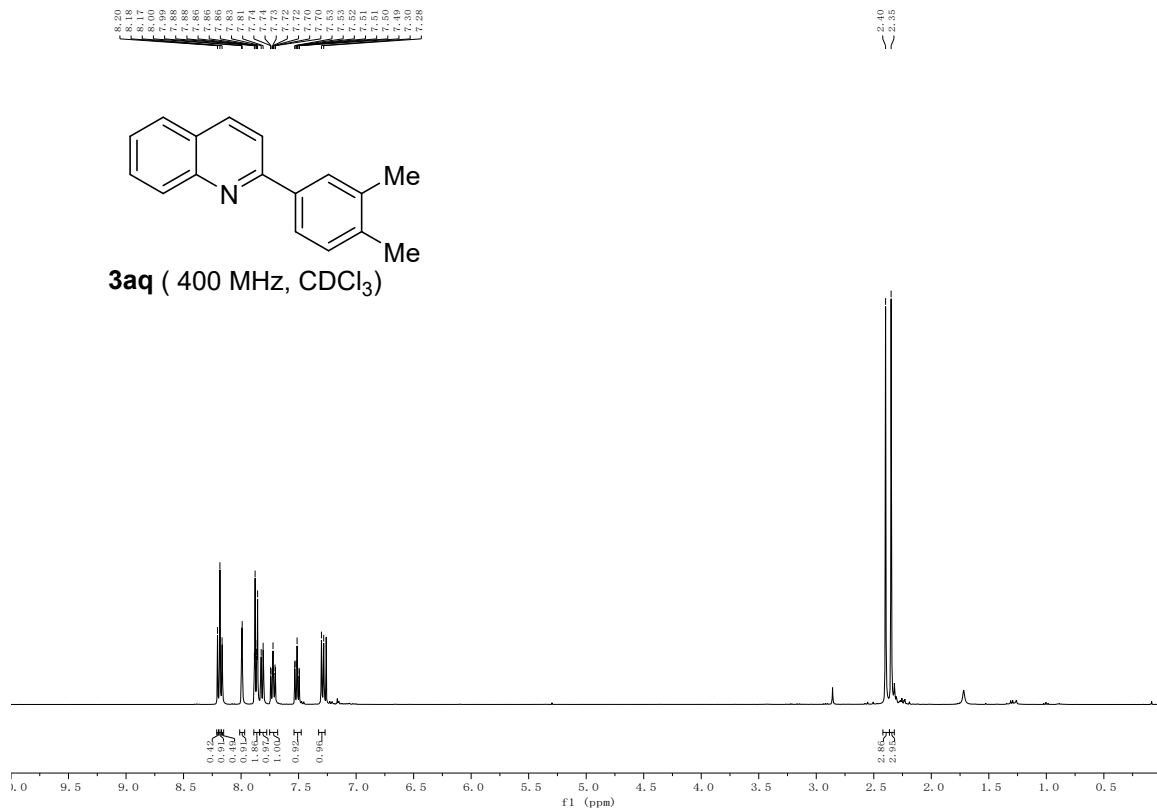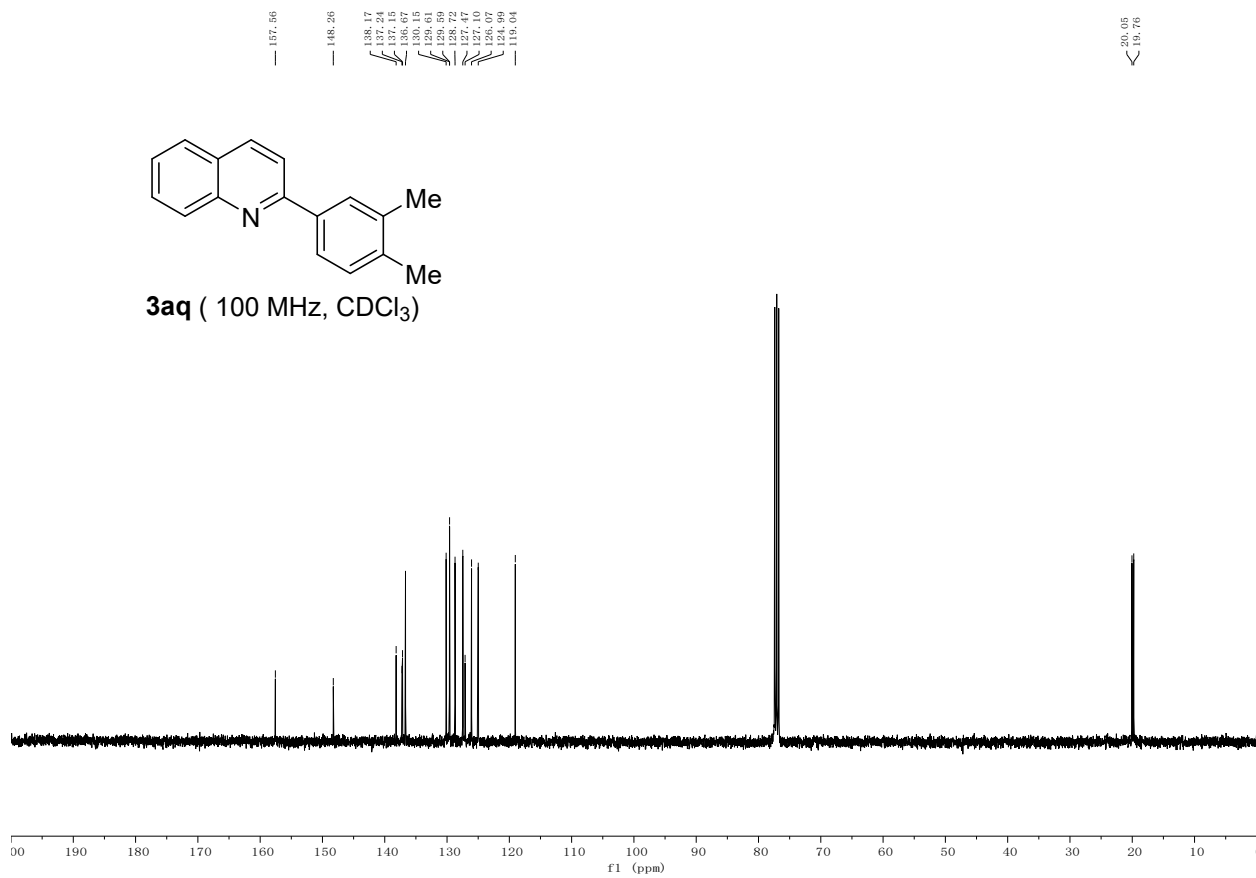

8.63  
8.39  
8.37  
8.28  
8.24  
8.24  
8.05  
8.04  
8.01  
7.91  
7.90  
7.86  
7.77  
7.76  
7.74  
7.53  
7.51

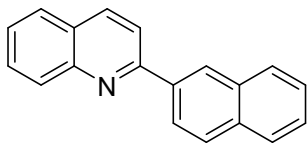

**3ar** ( 600 MHz, CDCl<sub>3</sub>)

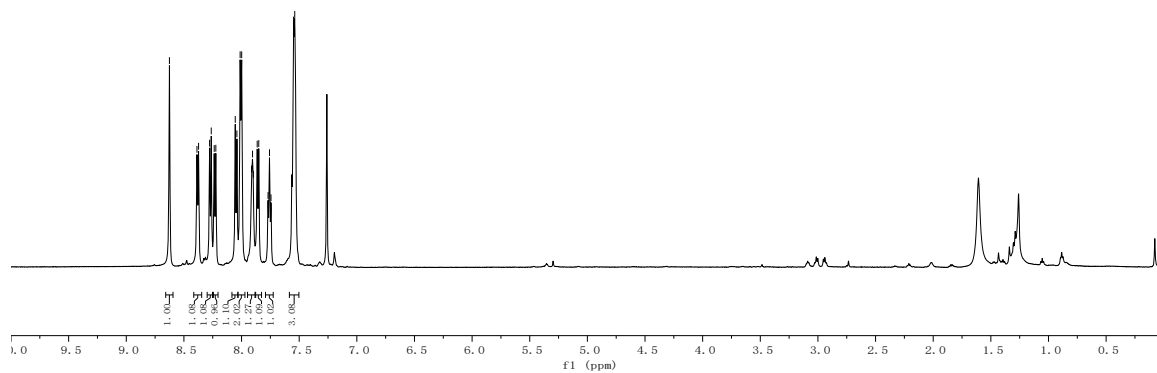

157.19  
148.35  
138.84  
138.84  
133.89  
133.52  
128.77  
128.77  
128.85  
128.60  
127.74  
127.25  
127.25  
126.74  
126.86  
126.86  
125.09  
119.20

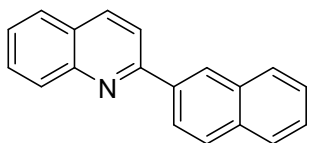

**3ar** ( 150 MHz, CDCl<sub>3</sub>)

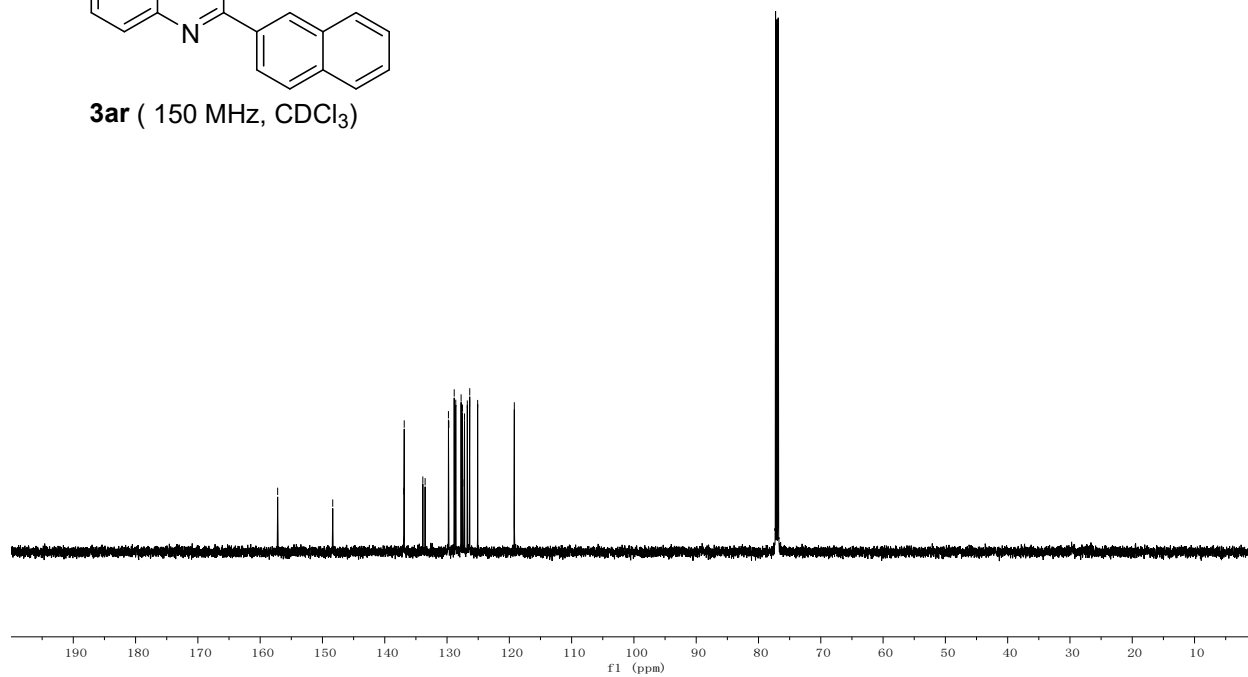

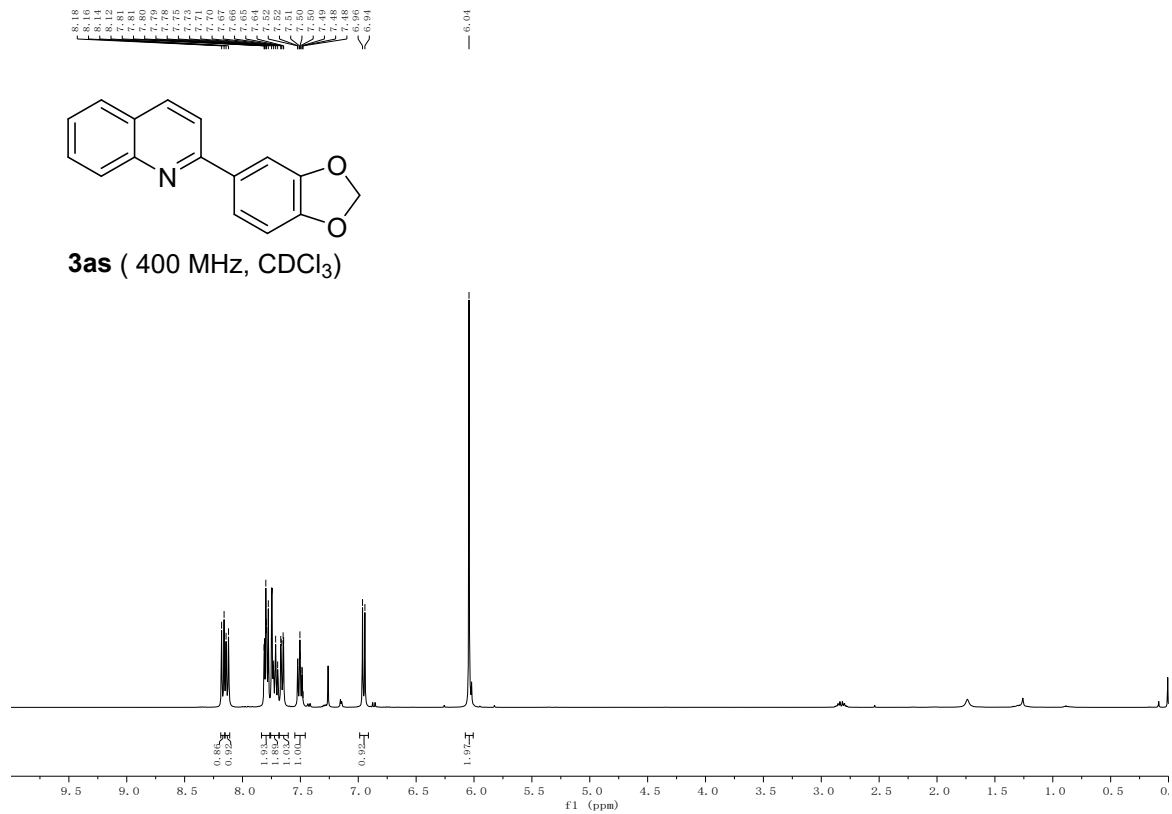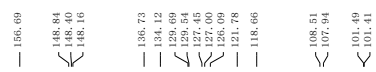

8.17  
8.15  
8.13  
7.83  
7.79  
7.77  
7.73  
7.72  
7.70  
7.68  
7.63  
7.63  
7.62  
7.52  
7.48  
7.22  
7.22  
6.60  
6.59  
6.38

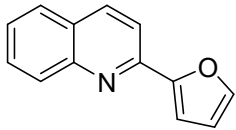

**3at** ( 400 MHz, CDCl<sub>3</sub>)

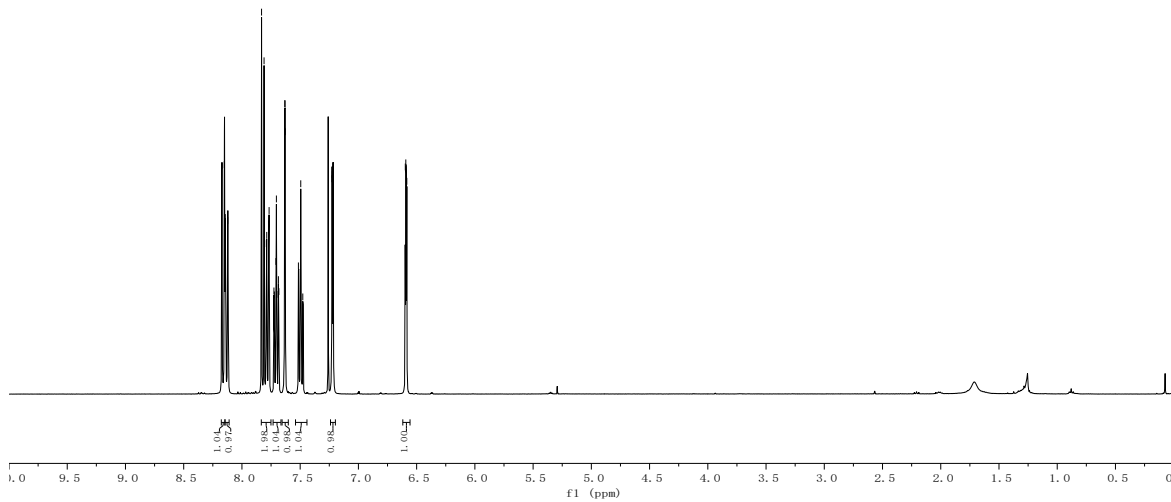

153.67  
149.01  
148.09  
144.14  
138.69  
129.89  
127.85  
127.37  
127.15  
126.22  
117.48  
113.23  
110.17

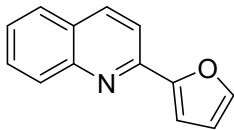

**3at** ( 150 MHz, CDCl<sub>3</sub>)

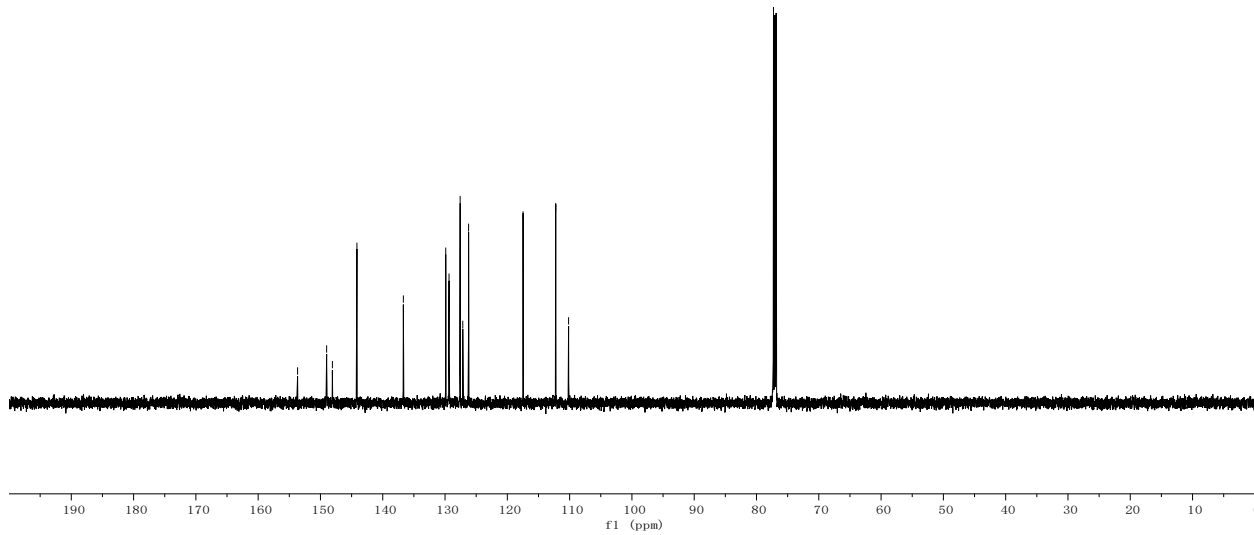

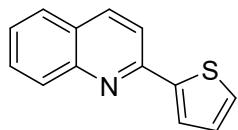

**3au** ( 600 MHz, CDCl<sub>3</sub>)

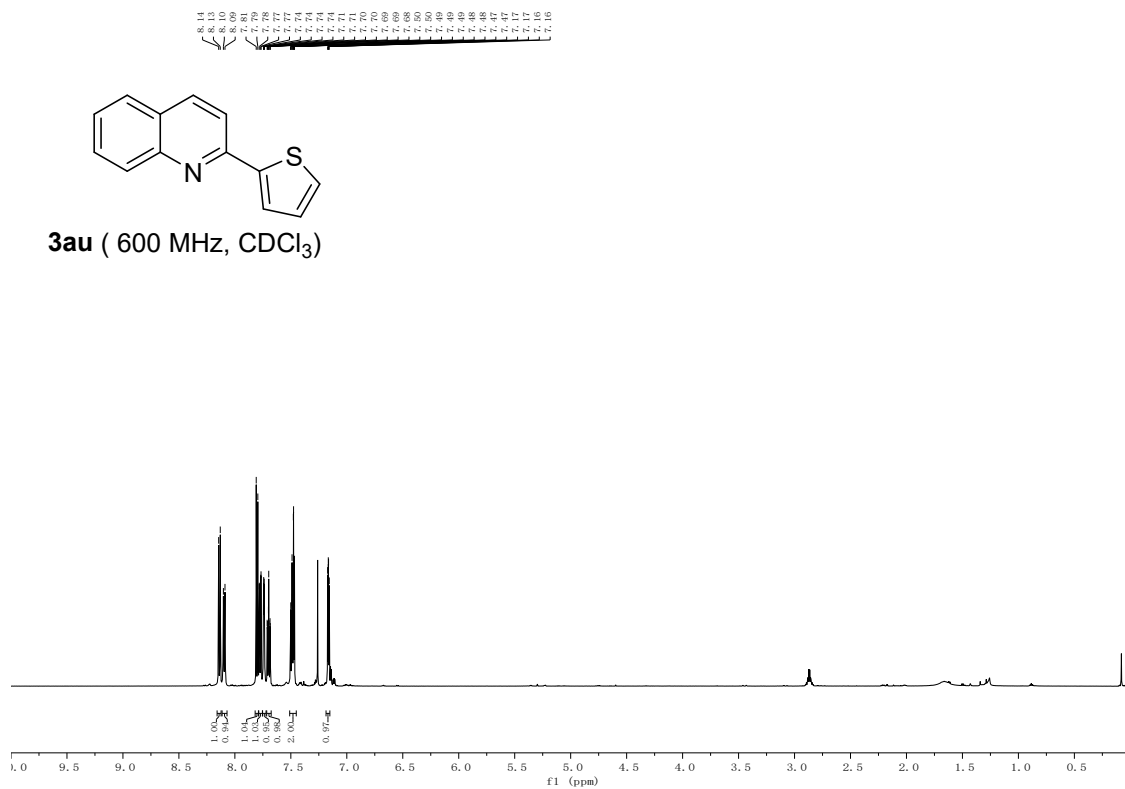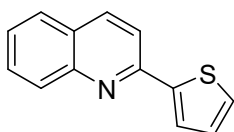

**3au** ( 150 MHz, CDCl<sub>3</sub>)

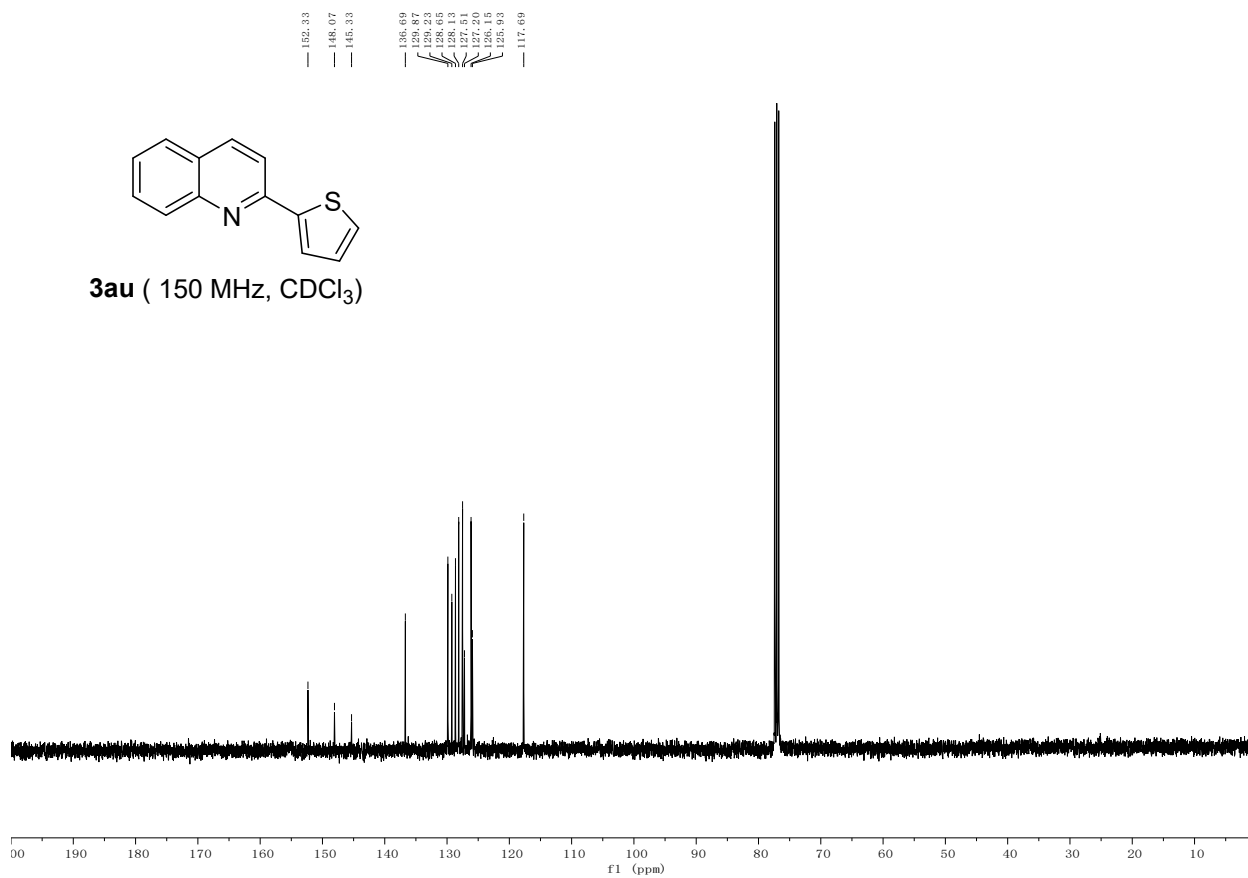

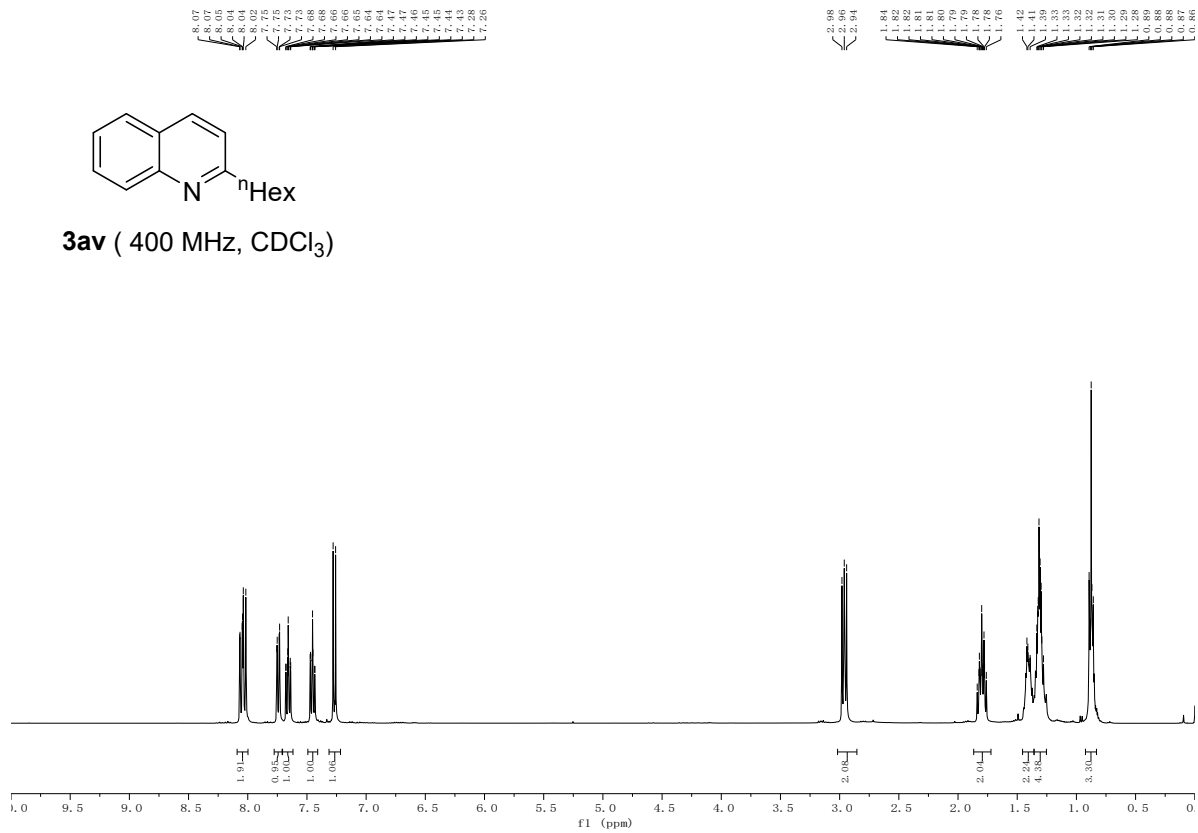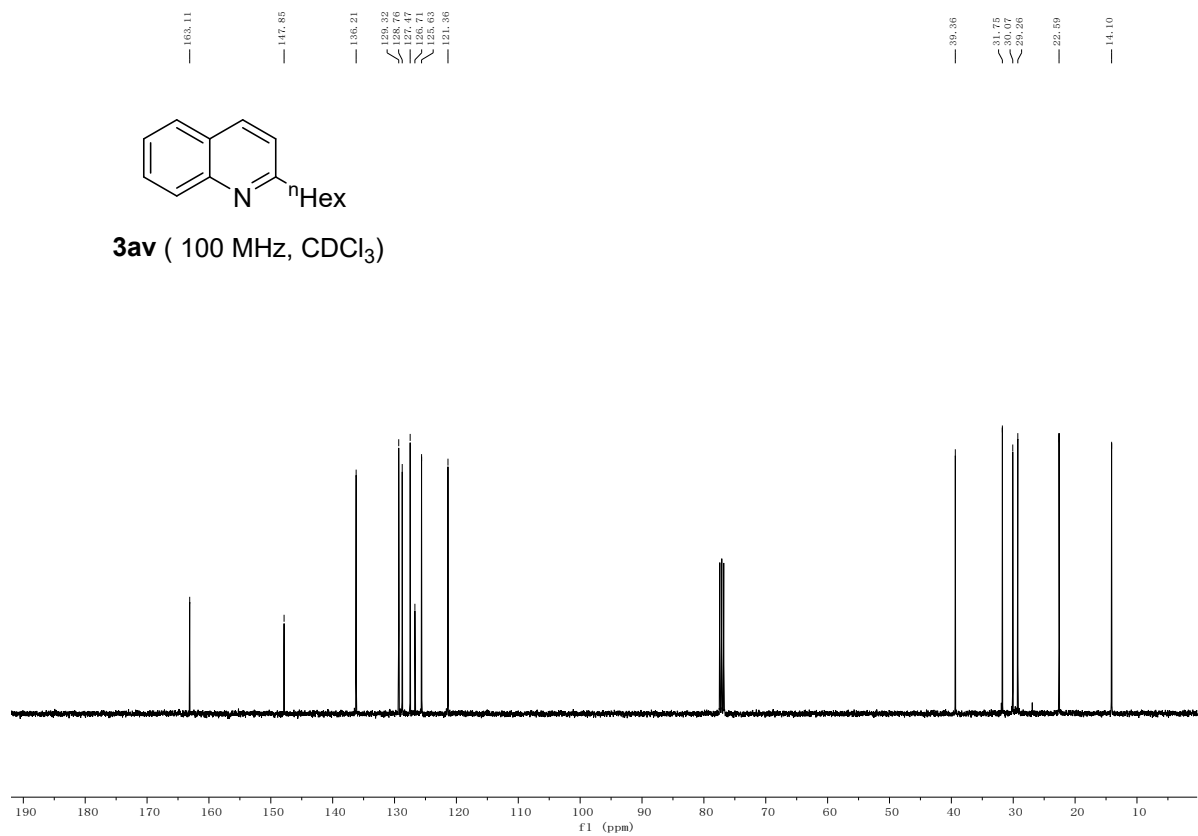



8.02  
7.80  
7.73  
7.72  
7.62  
7.62  
7.61  
7.60  
7.46  
7.45  
7.44  
7.43  
7.43

3.17  
3.16  
3.09  
3.09  
3.08  
3.07  
3.06  
2.23  
2.20  
2.19  
2.18

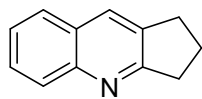

**3aw** ( 600 MHz, CDCl<sub>3</sub>)

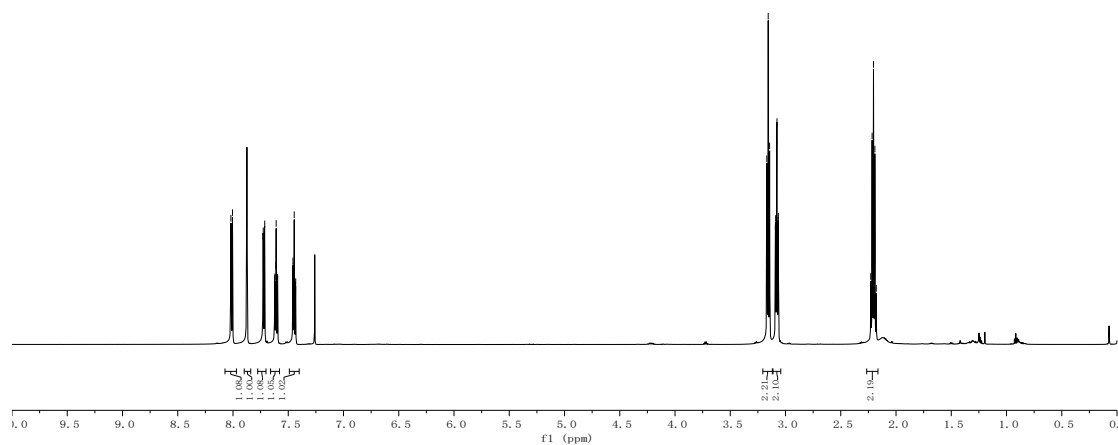

167.94  
147.49  
135.64  
130.56  
128.56  
128.36  
127.46  
125.53  
34.65  
30.55  
23.67

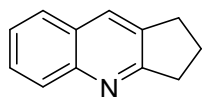

**3aw** ( 100 MHz, CDCl<sub>3</sub>)

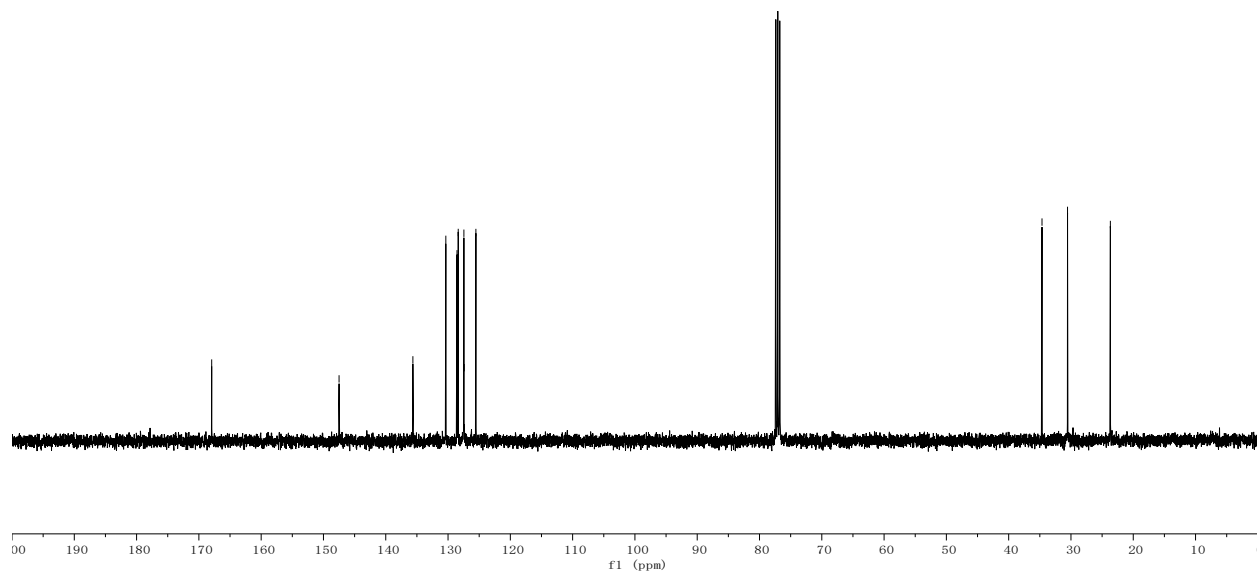

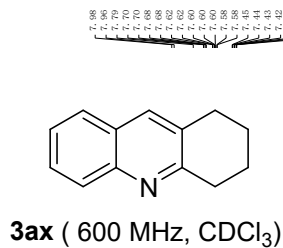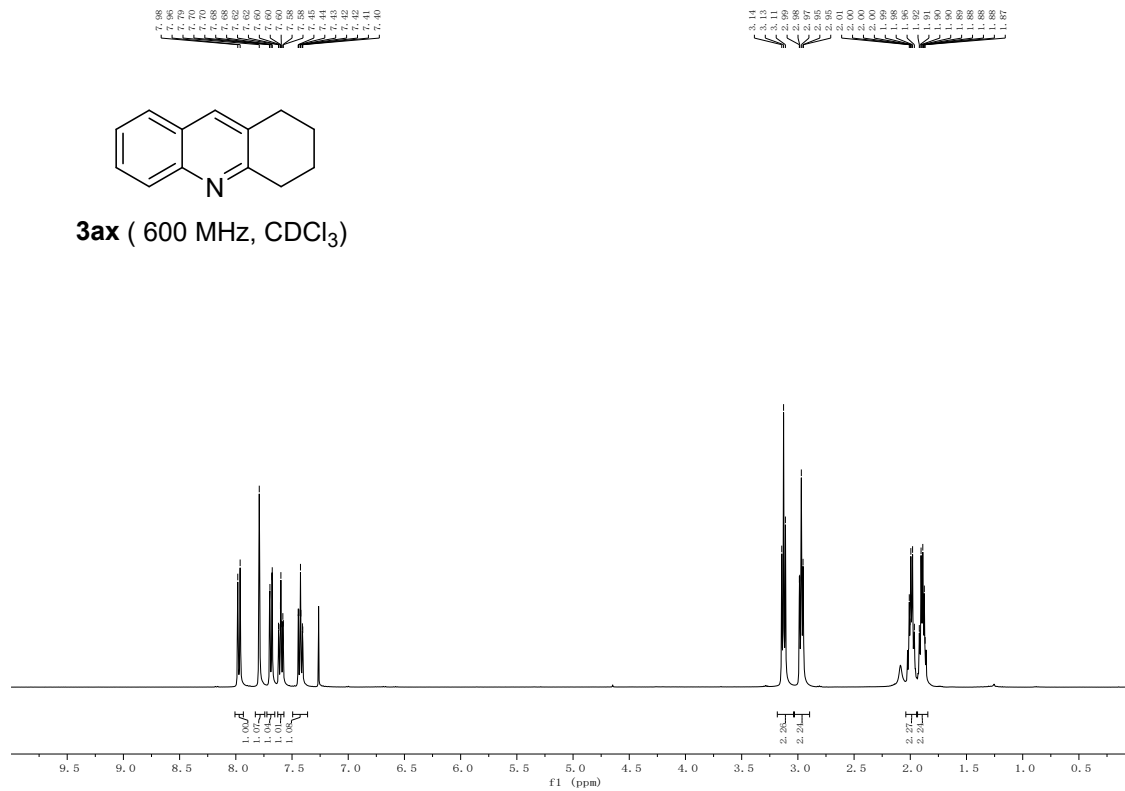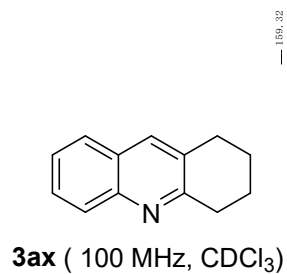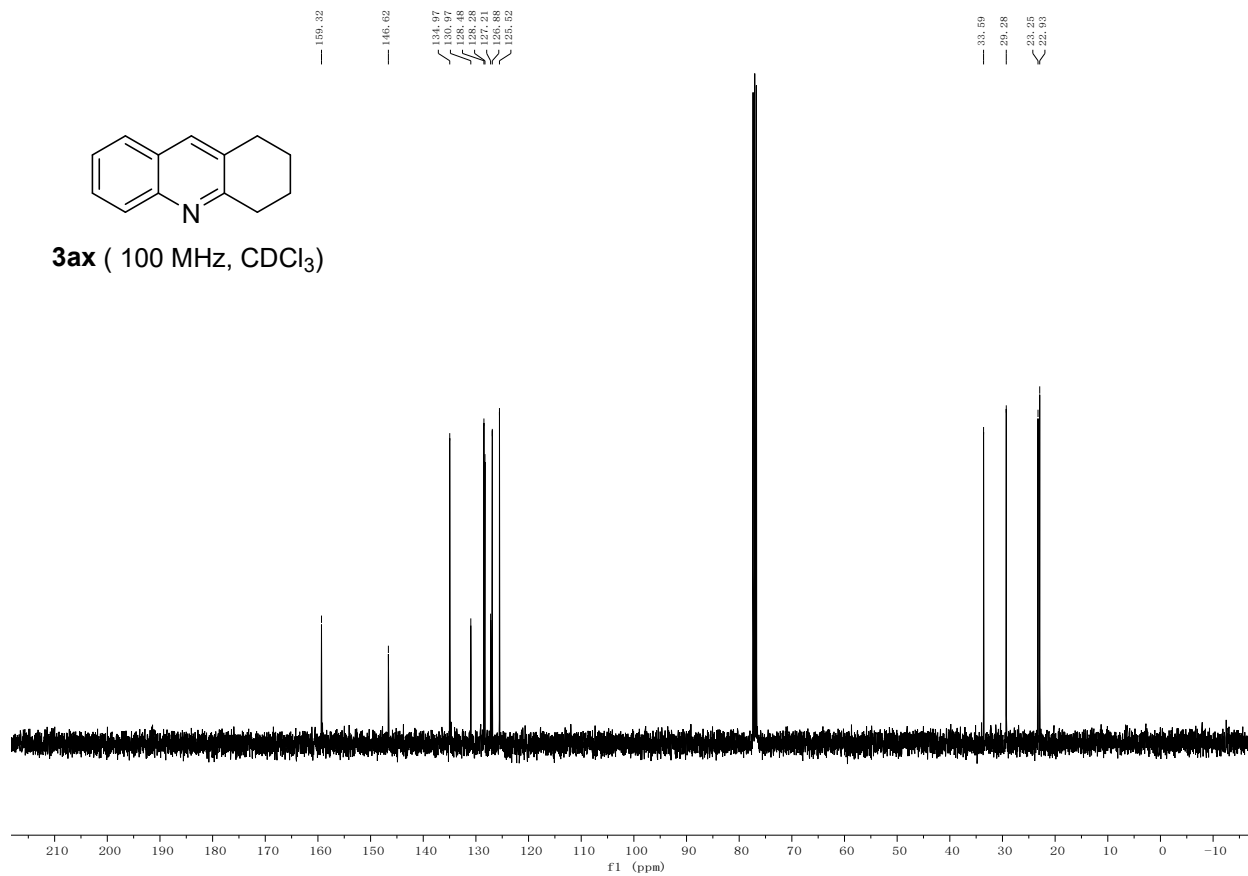

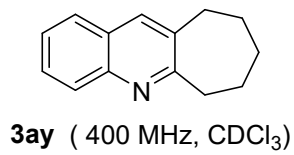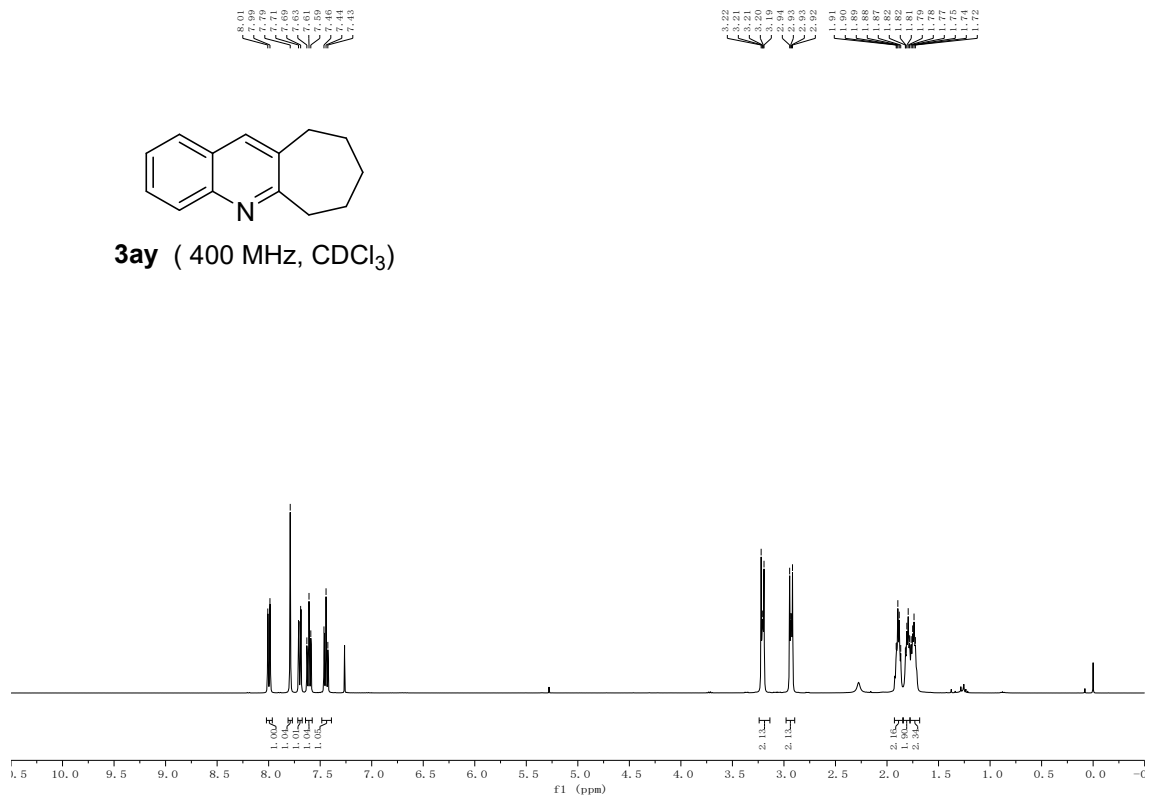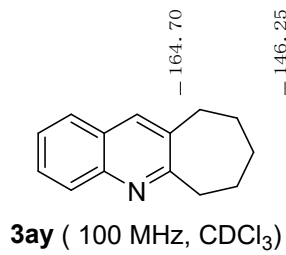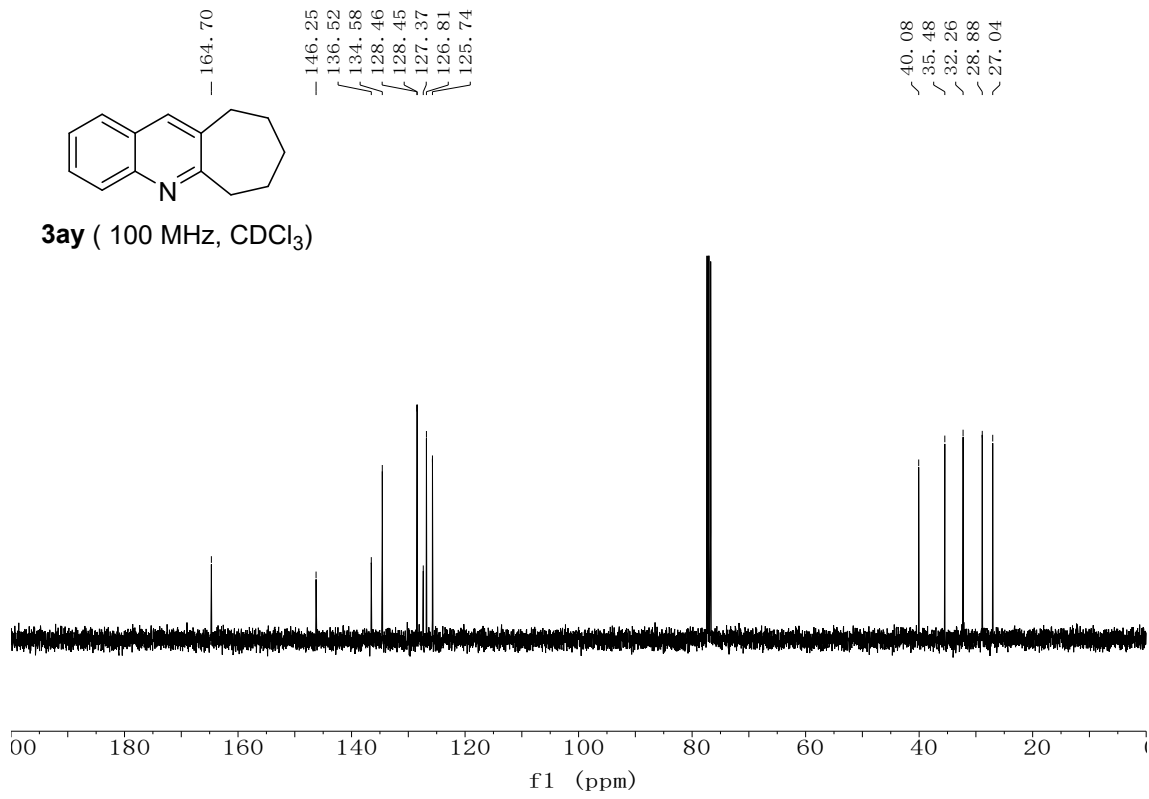

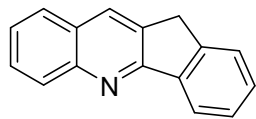

**3az** ( 400 MHz, CDCl<sub>3</sub>)

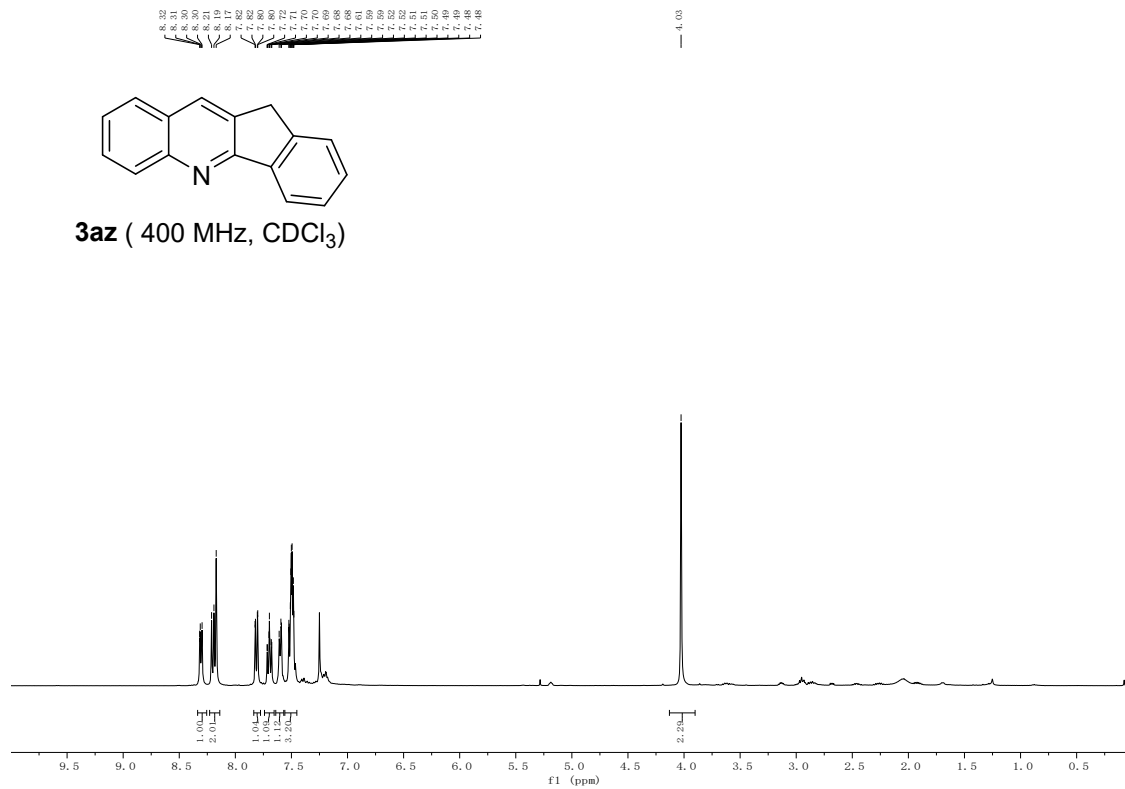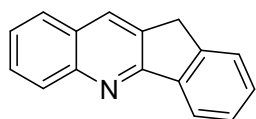

**3az** ( 100 MHz, CDCl<sub>3</sub>)

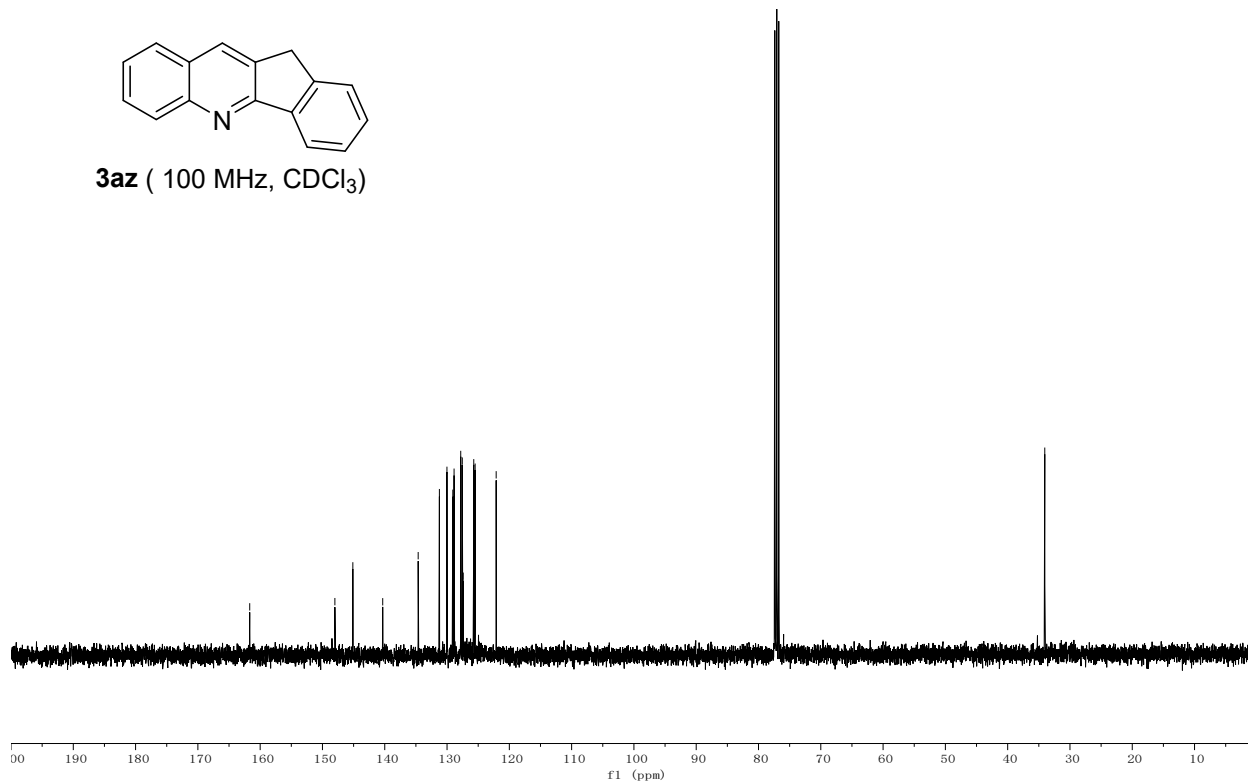

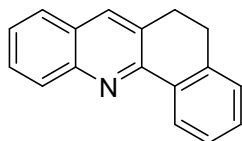

**3aaa** ( 600 MHz, CDCl<sub>3</sub>)

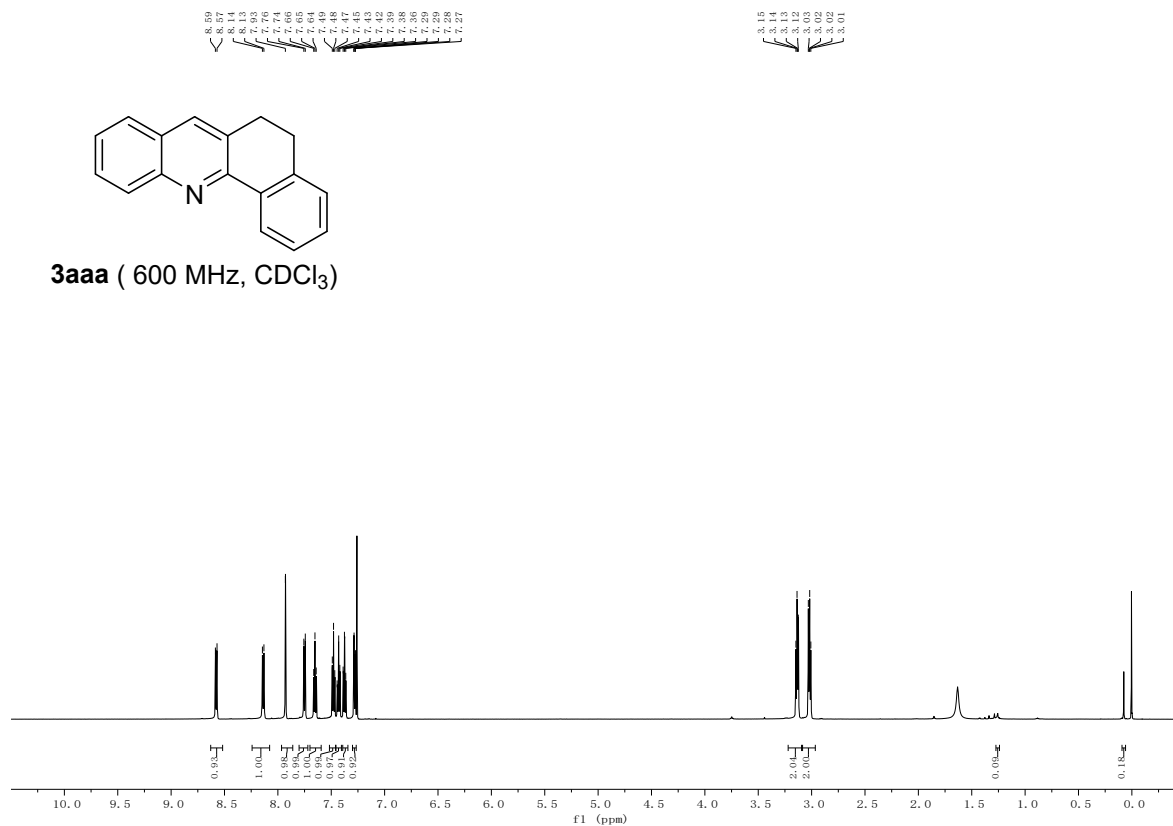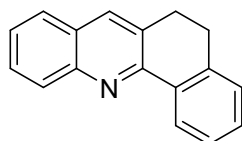

**3aaa** ( 150 MHz, CDCl<sub>3</sub>)

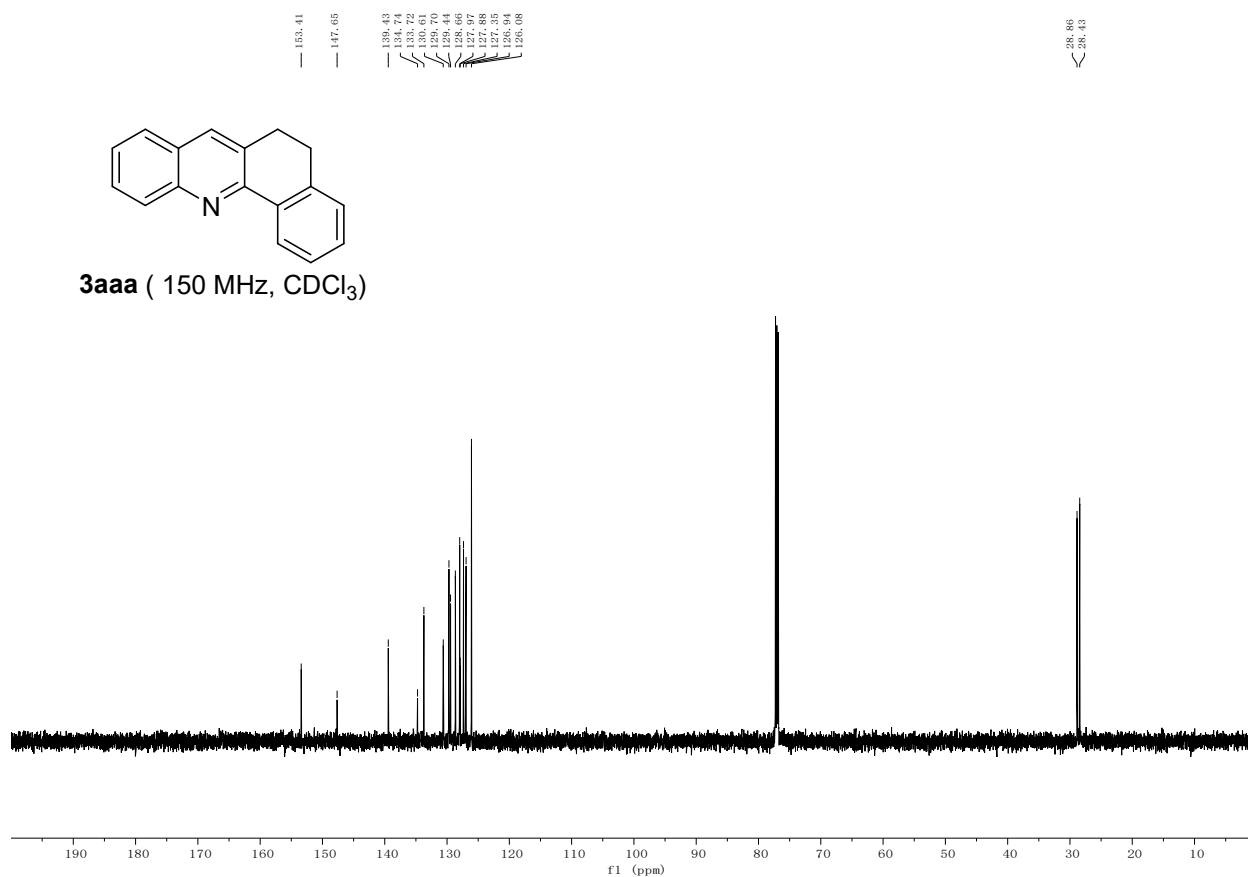

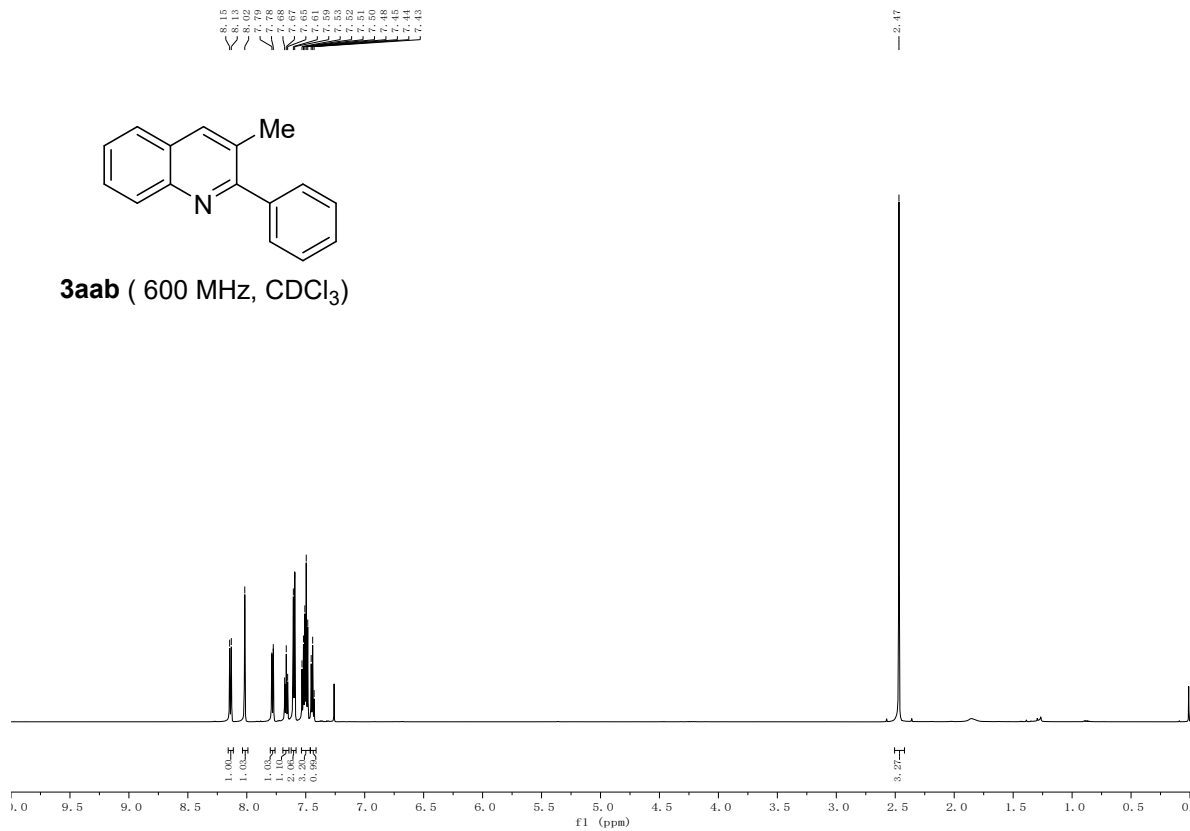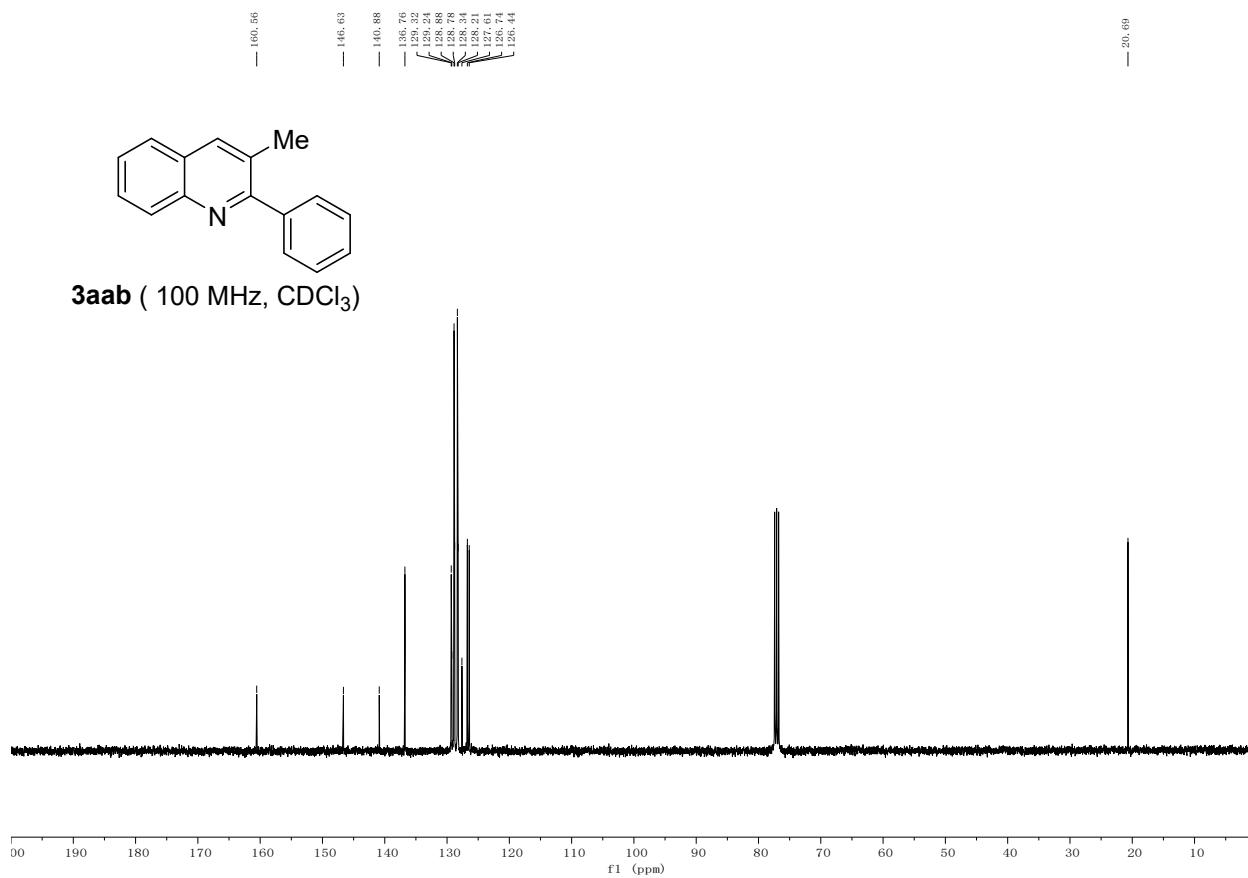

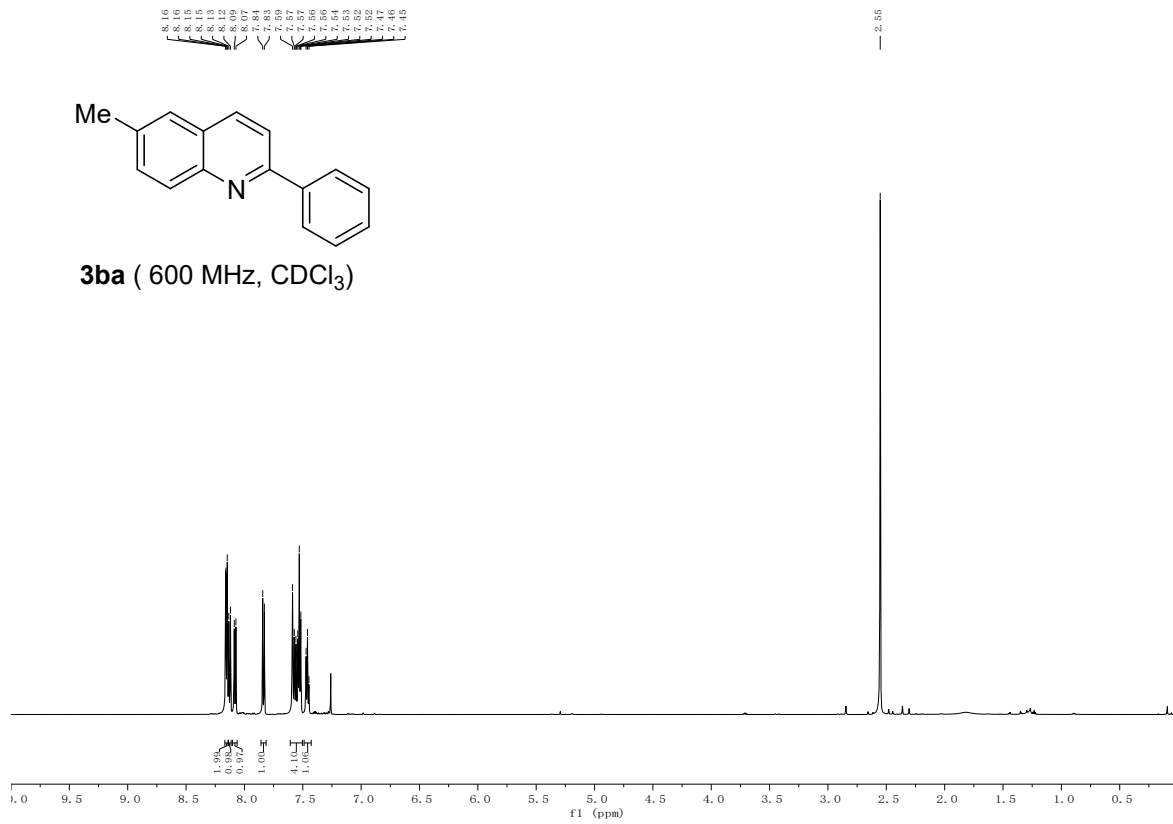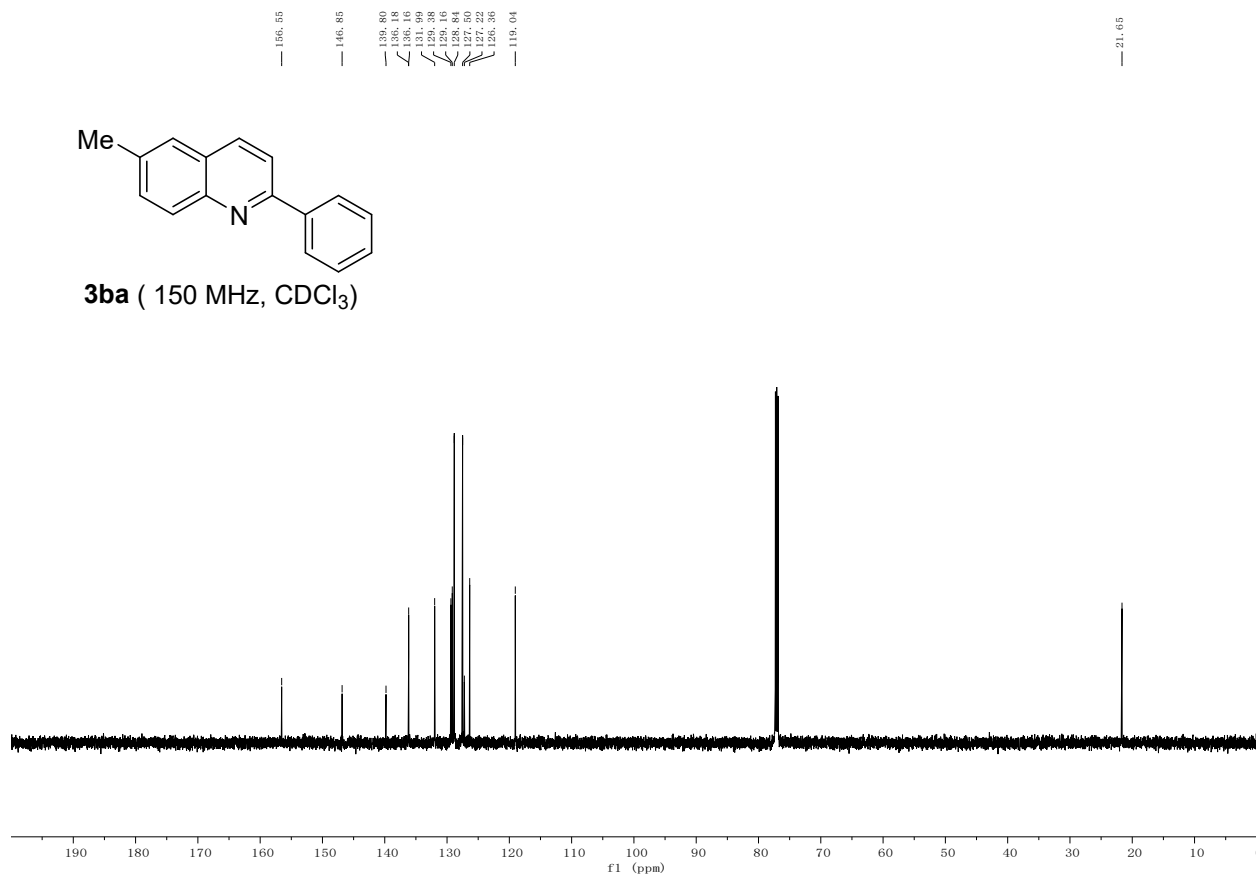

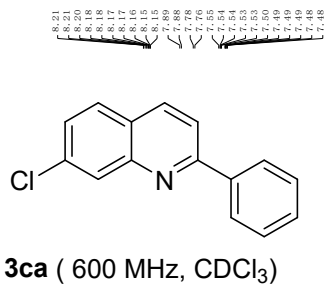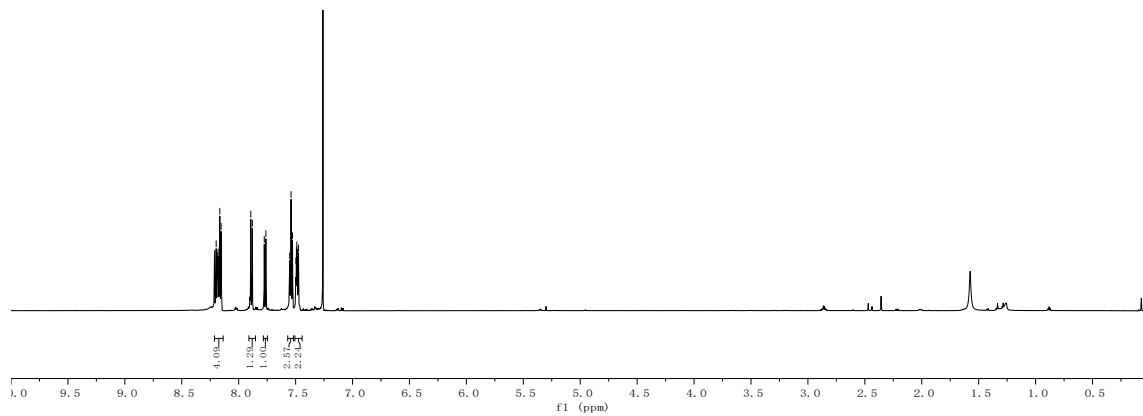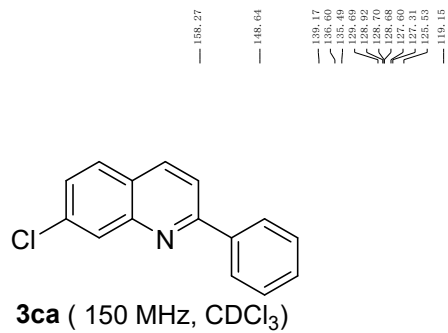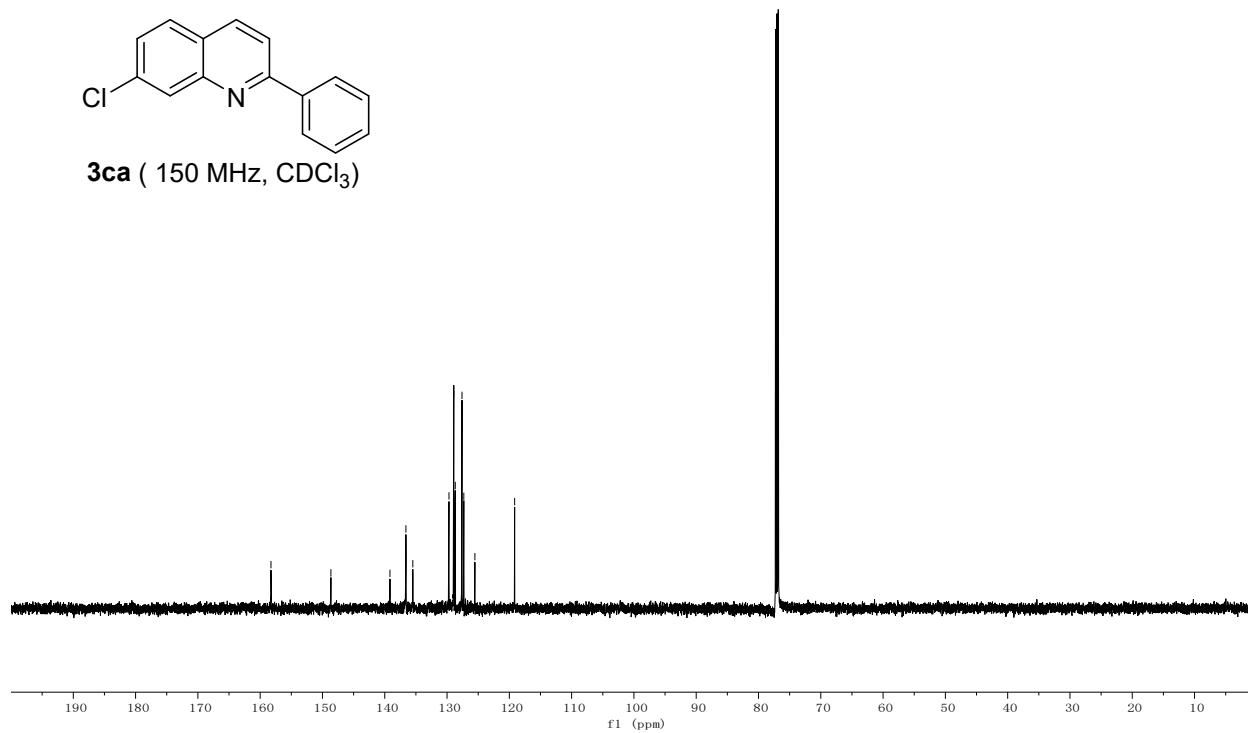



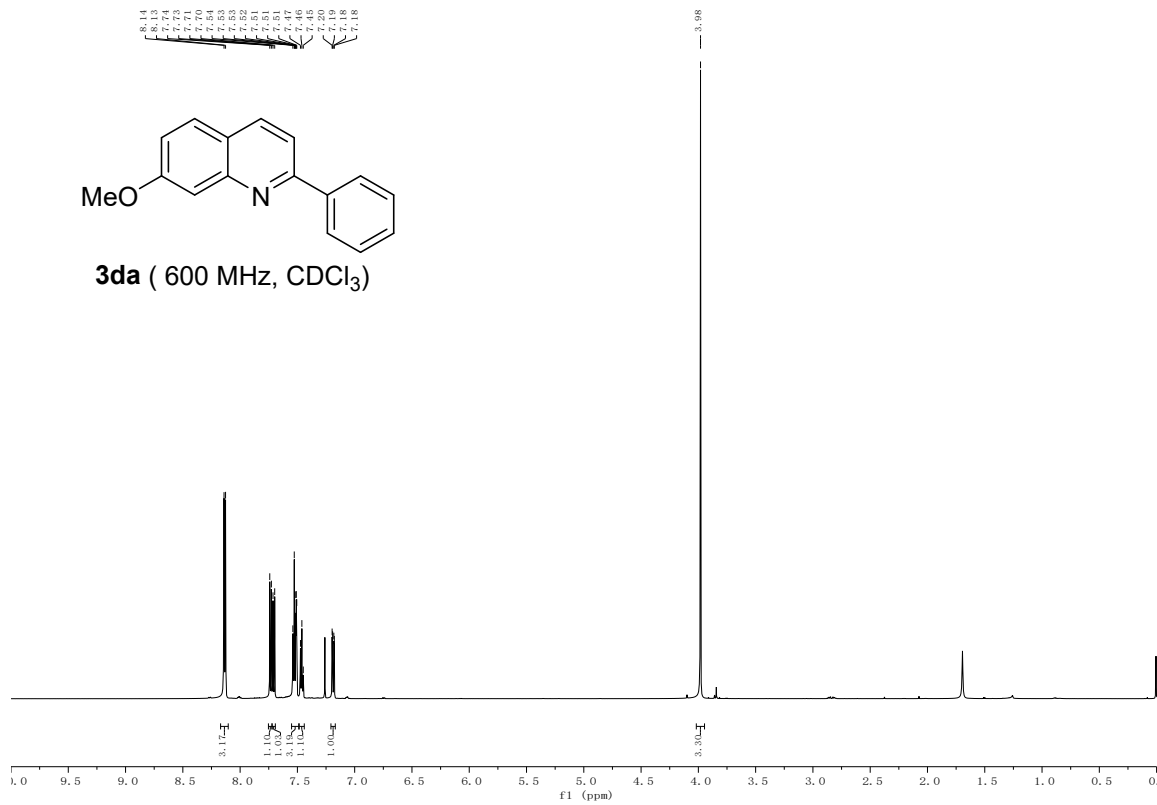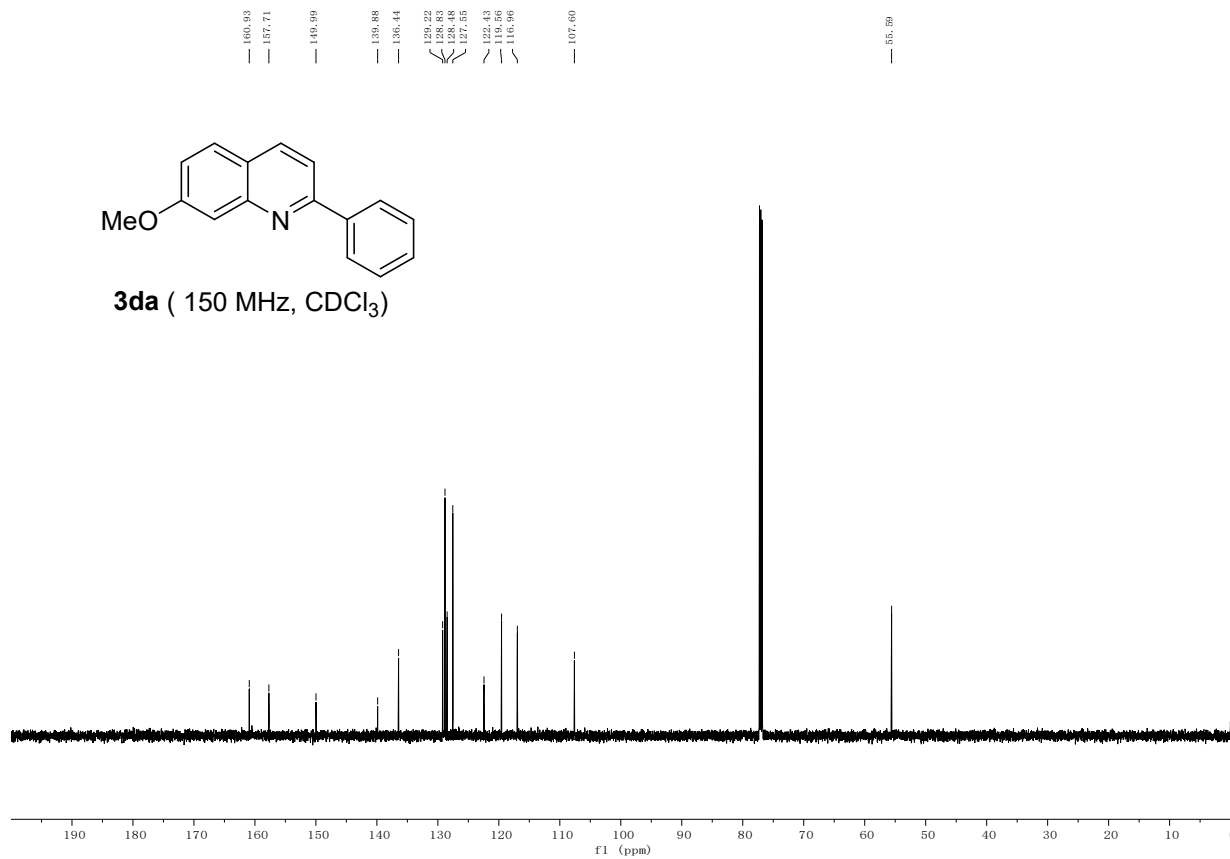

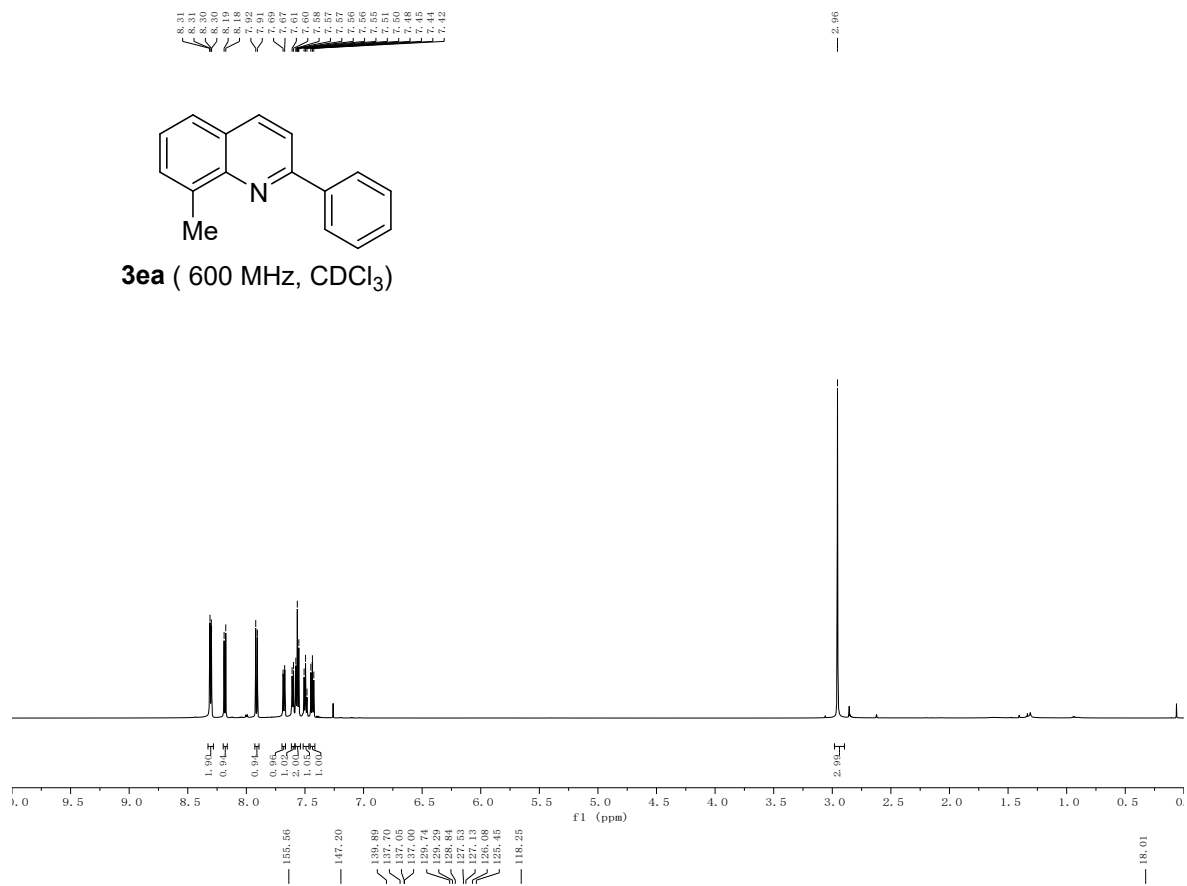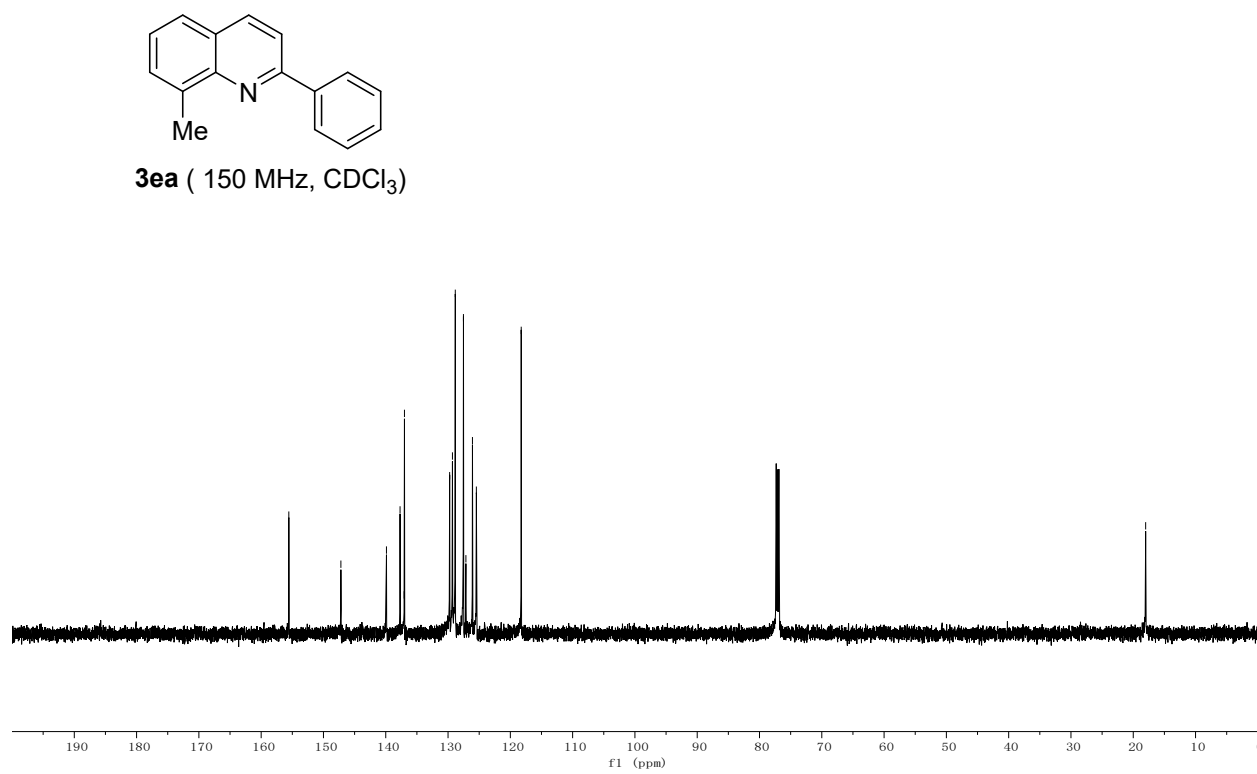



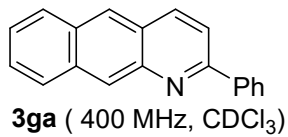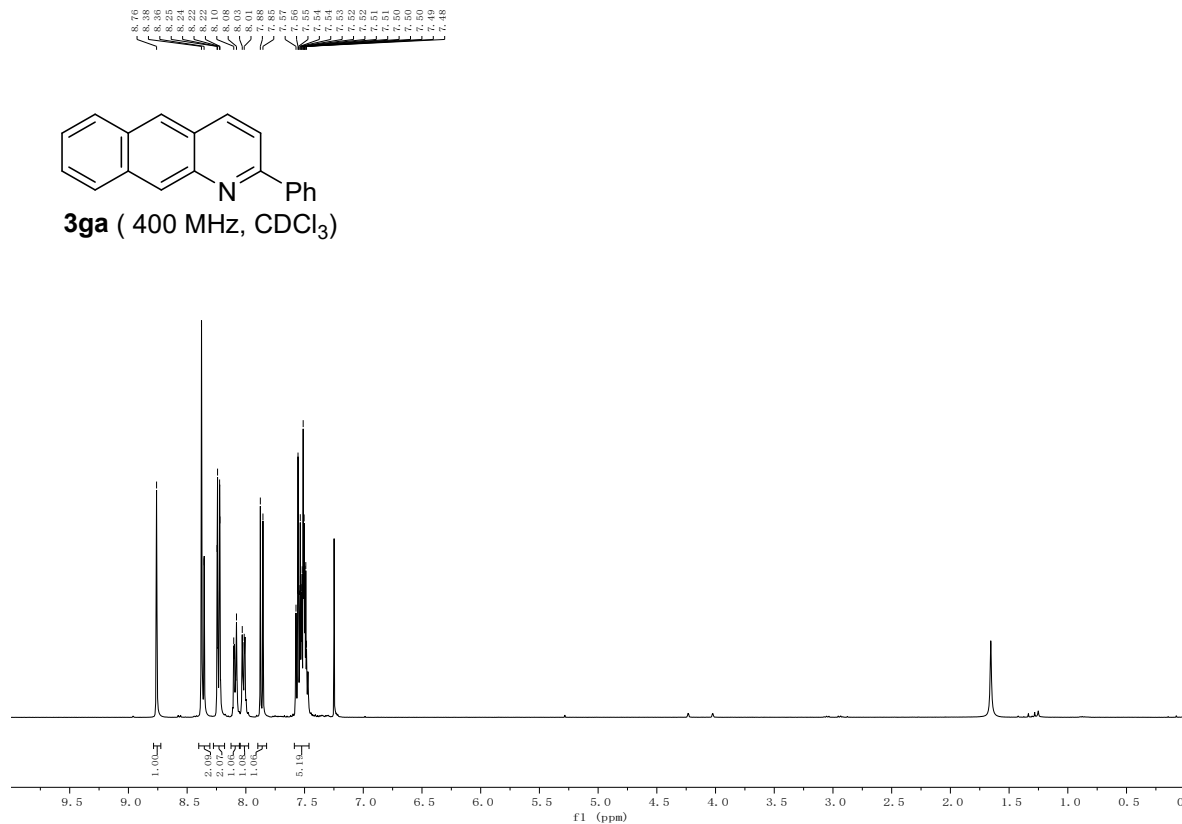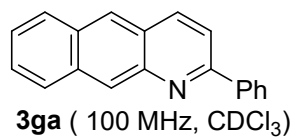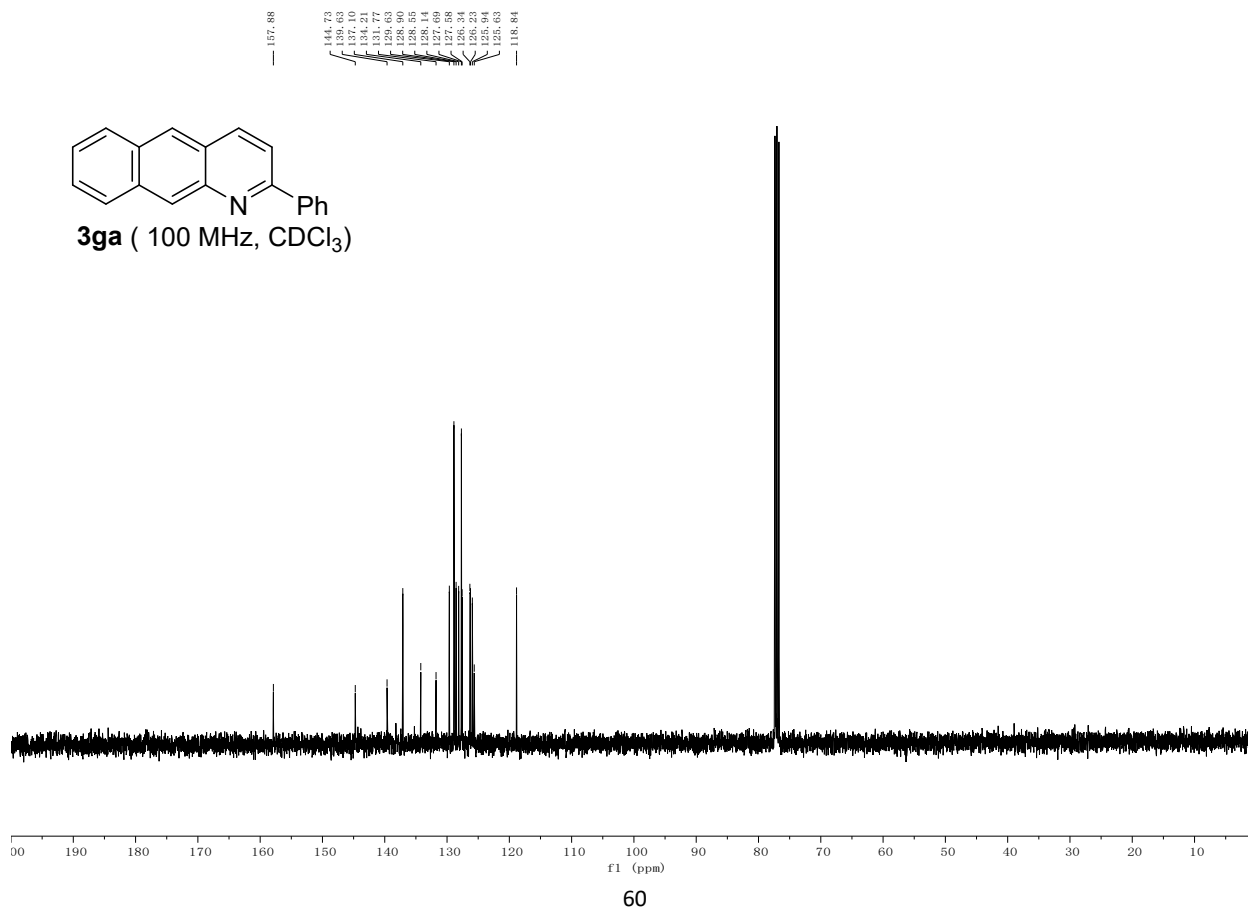

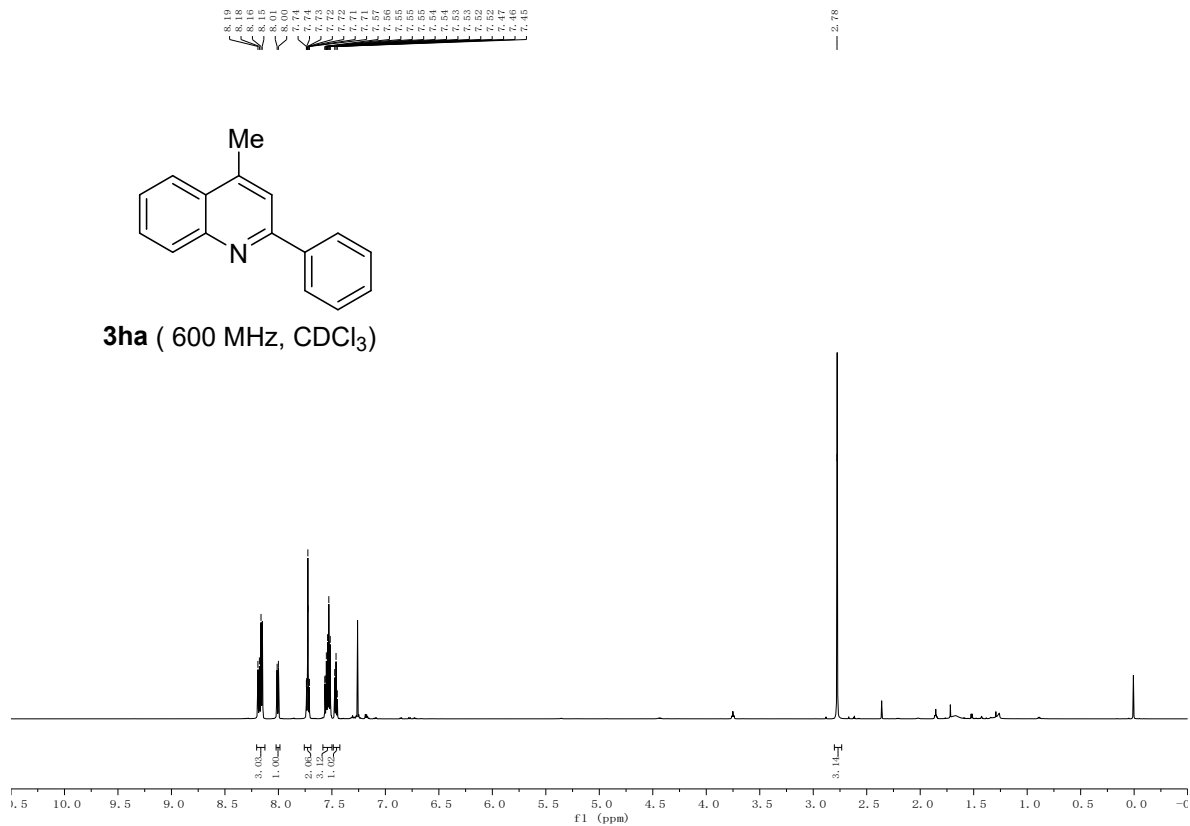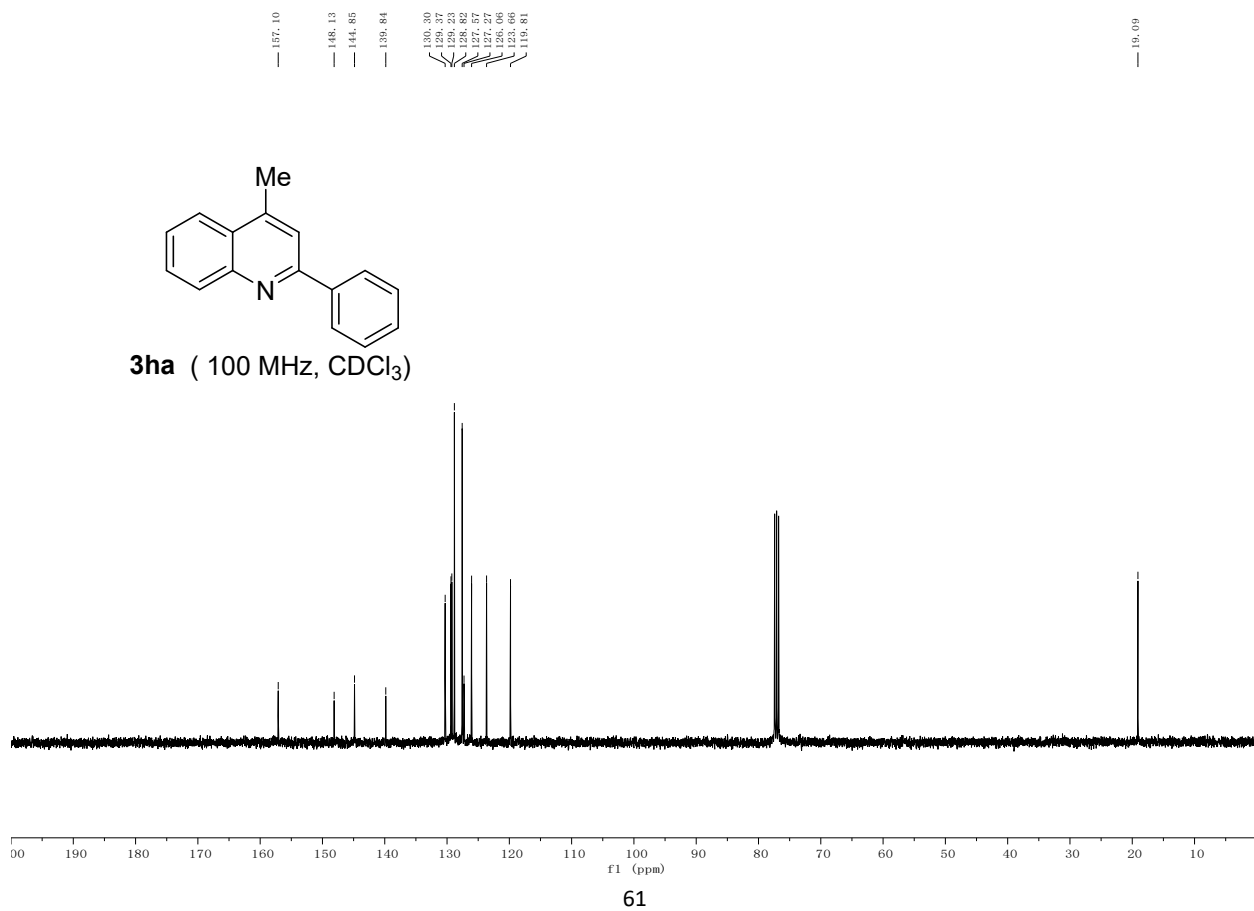

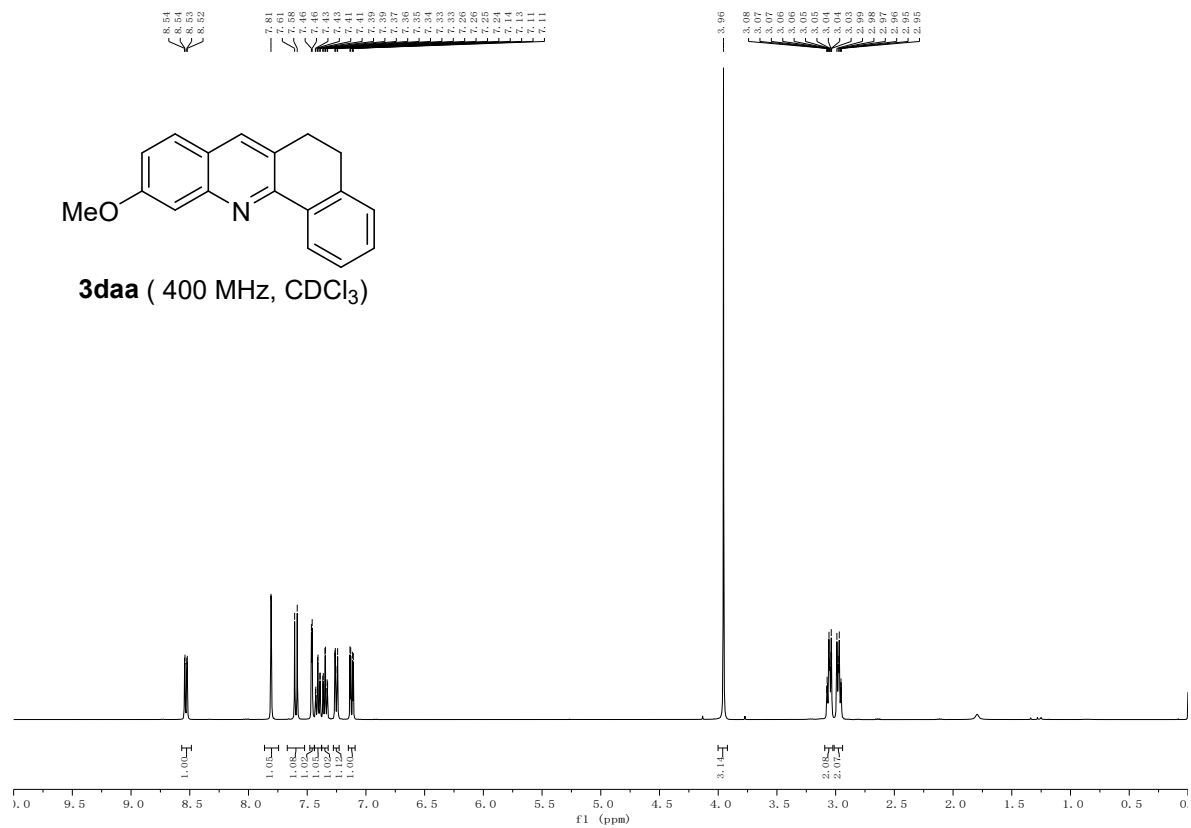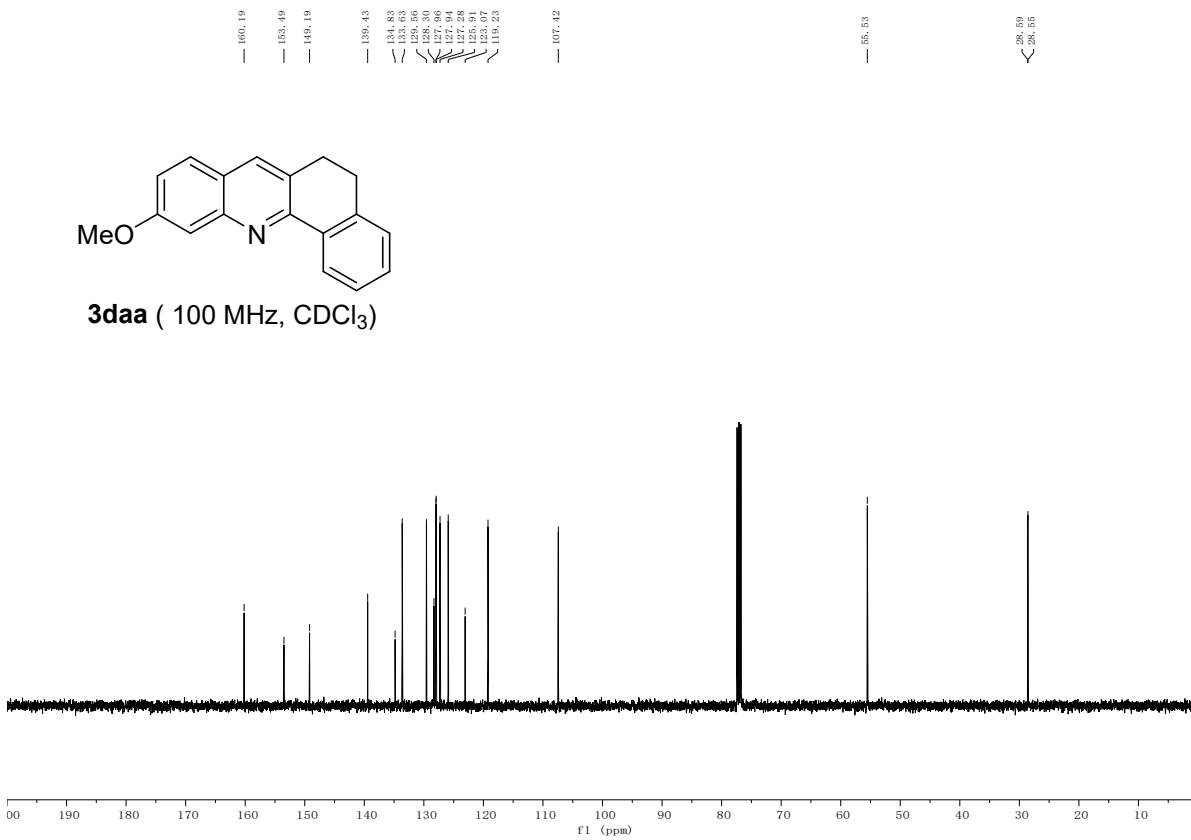

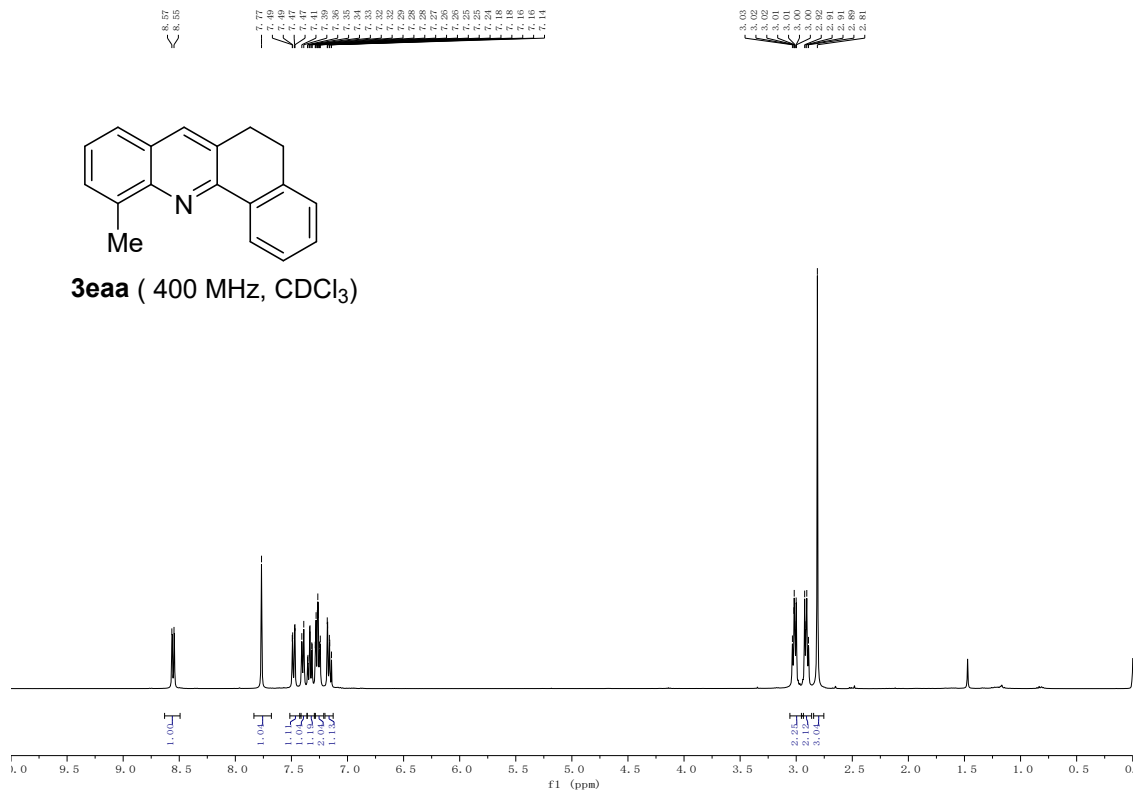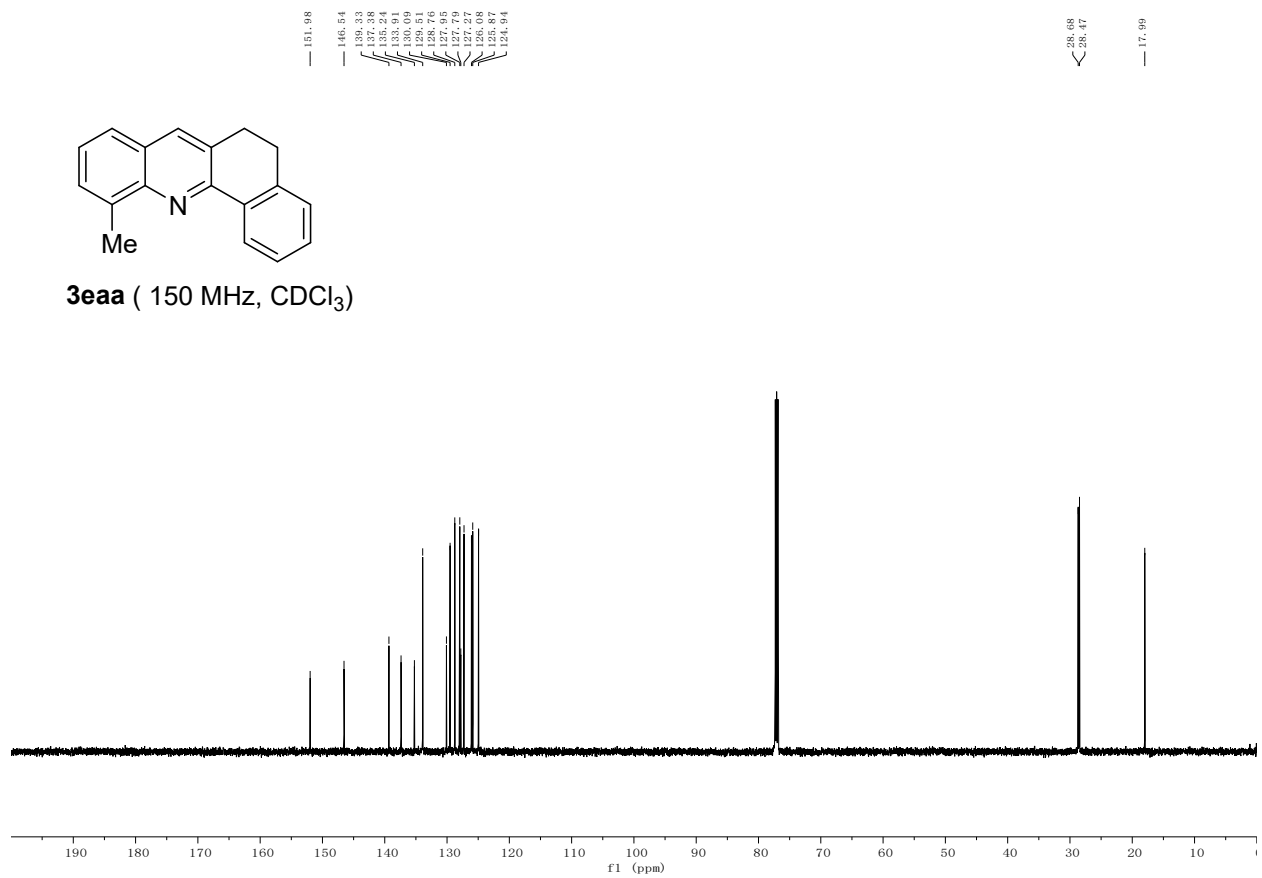

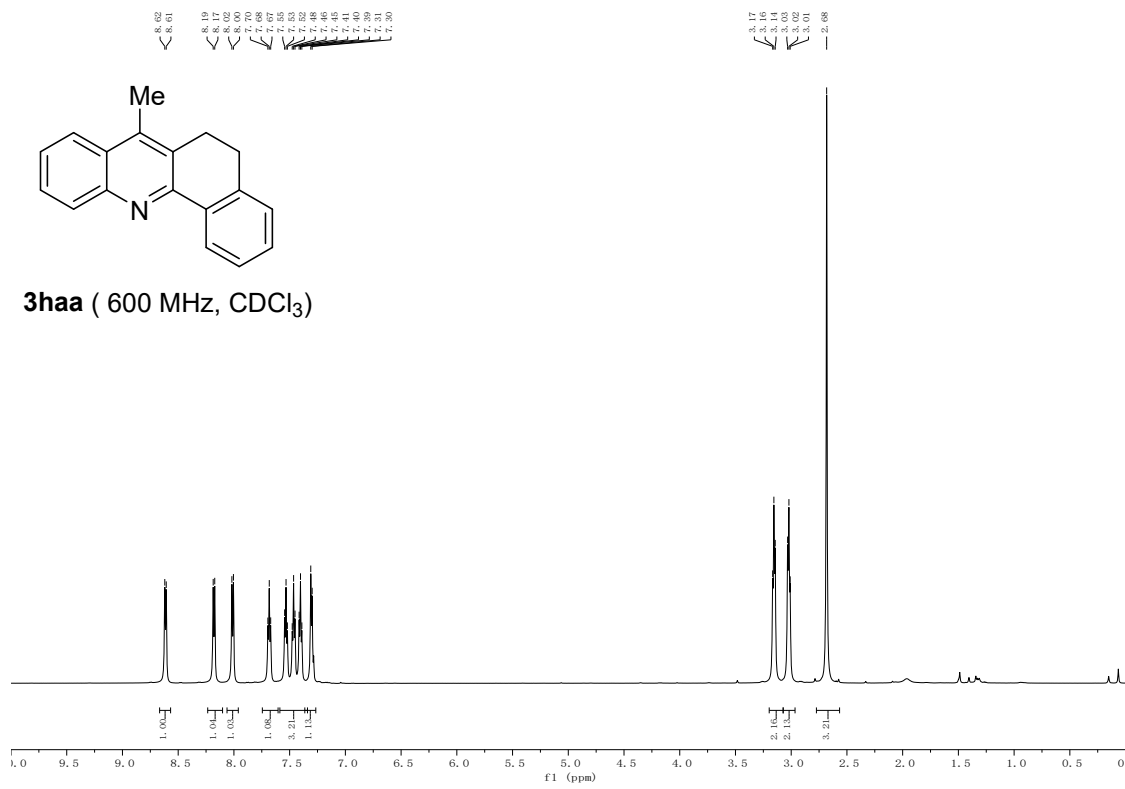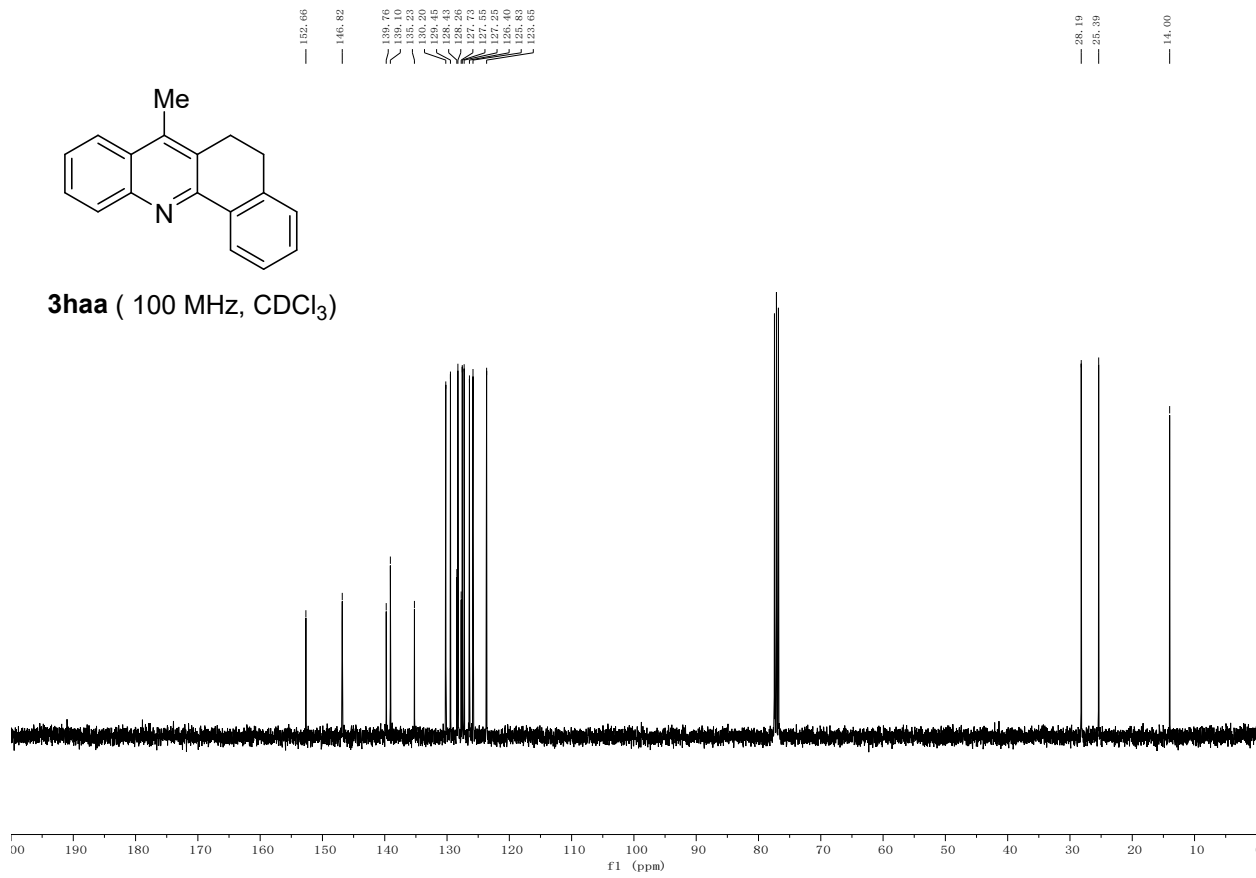



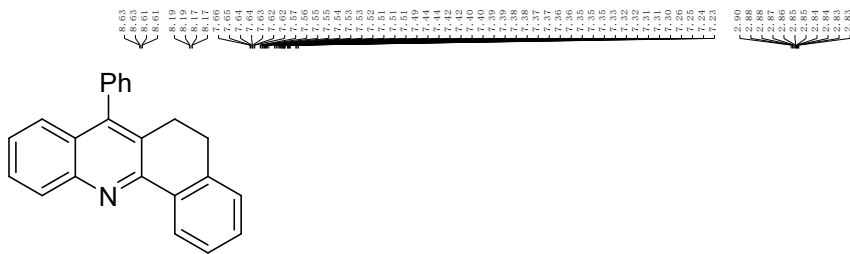

**3iaa** ( 400 MHz, CDCl<sub>3</sub>)

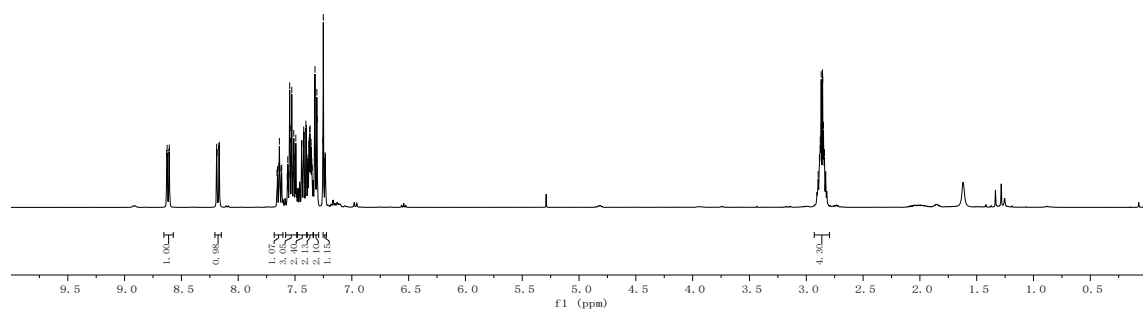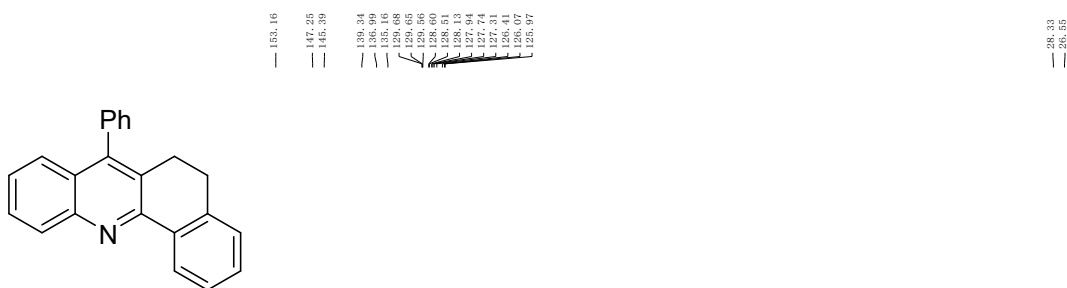

**3iaa** (100 MHz, CDCl<sub>3</sub>)

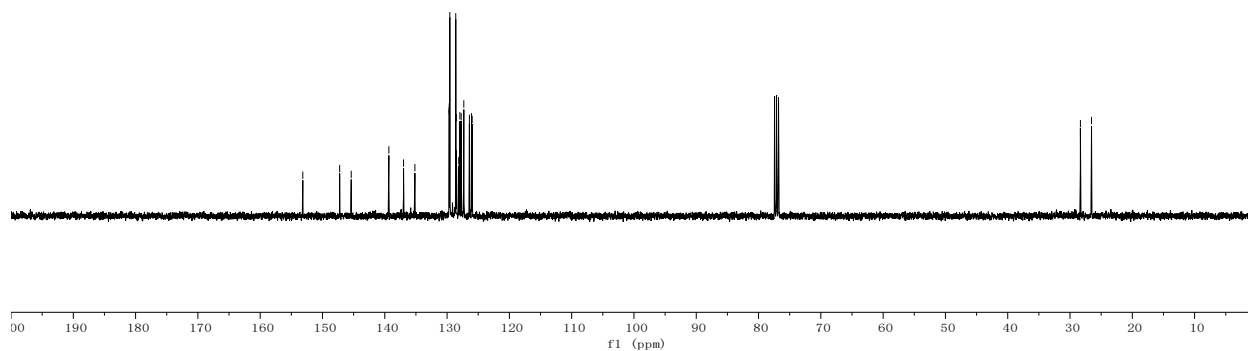

## References

1. (a) Wang, Y.; Zhu, L.; Shao, Z.; Li, G.; Lan, Y.; Liu, Q., Unmasking the Ligand Effect in Manganese-Catalyzed Hydrogenation: Mechanistic Insight and Catalytic Application. *J. Am. Chem. Soc.* **2019**, *141*, 17337-17349; (b) Ma, W.; Cui, S.; Sun, H.; Tang, W.; Xue, D.; Li, C.; Fan, J.; Xiao, J.; Wang, C., Iron-Catalyzed Alkylation of Nitriles with Alcohols. *Chem.Eur.J.* **2018**, *24*, 13118-13123; (c) Mastalir, M.; Stöger, B.; Pittenauer, E.; Puchberger, M.; Allmaier, G.; Kirchner, K., Air Stable Iron(II) PNP Pincer Complexes as Efficient Catalysts for the Selective Alkylation of Amines with Alcohols. *Adv. Synth. Catal.* **2016**, *358*, 3824-3831; (d) Glatz, M.; Holzhacker, C.; Bichler, B.; Mastalir, M.; Stöger, B.; Mereiter, K.; Weil, M.; Veiros, L. F.; Mösch-Zanetti, N. C.; Kirchner, K., Fell Carbonyl Complexes Featuring Small to Bulky PNP Pincer Ligands – Facile Substitution of  $\kappa^2\text{P,N}$ -Bound PNP Ligands by Carbon Monoxide. *Eur. J. Org. Chem.* **2015**, *2015*, 5053-5065; (e) Langer, R.; Leitus, G.; Ben-David, Y.; Milstein, D., Efficient Hydrogenation of Ketones Catalyzed by an Iron Pincer Complex. *Angew. Chem. Int. Ed.* **2011**, *50*, 2120-2124; (f) Benito-Garagorri, D.; Alves, L. G.; Puchberger, M.; Mereiter, K.; Veiros, L. F.; Calhorda, M. J.; Carvalho, M. D.; Ferreira, L. P.; Godinho, M.; Kirchner, K., Striking Differences between the Solution and Solid-State Reactivity of Iron PNP Pincer Complexes with Carbon Monoxide. *Organometallics* **2009**, *28*, 6902-6914.
2. Guo, B.; Yu, T.-Q.; Li, H.-X.; Zhang, S.-Q.; Braunstein, P.; Young, D. J.; Li, H.-Y.; Lang, J.-P., Phosphine Ligand-Free Ruthenium Complexes as Efficient Catalysts for the Synthesis of Quinolines and Pyridines by Acceptorless Dehydrogenative Coupling Reactions. *ChemCatChem* **2019**, *11*, 2500-2510.
3. Bains, A. K.; Singh, V.; Adhikari, D., Homogeneous Nickel-Catalyzed Sustainable Synthesis of Quinoline and Quinoxaline under Aerobic Conditions. *J. Org. Chem.* **2020**, *85*, 14971-14979.
4. Xi, L.-Y.; Zhang, R.-Y.; Zhang, L.; Chen, S.-Y.; Yu, X.-Q., An efficient synthesis of quinolines via copper-catalyzed C–N cleavage. *Org. Biomol. Chem* **2015**, *13*, 3924-3930.
5. Hu, W.; Zhang, Y.; Zhu, H.; Ye, D.; Wang, D., Unsymmetrical triazolyl-naphthyridinyl-pyridine bridged highly active copper complexes supported on reduced graphene oxide and their application in water. *Green Chem.* **2019**, *21*, 5345-5351.
6. Handa, S.; Ibrahim, F.; Ansari, T. N.; Gallou, F.,  $\pi$ -Allylpalladium Species in Micelles of FI-750-M for Sustainable and General Suzuki-Miyaura Couplings of Unactivated Quinoline Systems in Water. *ChemCatChem* **2018**, *10*, 4229-4233.
7. Muzalevskiy, V. M.; Belyaeva, K. V.; Trofimov, B. A.; Nenajdenko, V. G., Organometal-Free Arylation and Arylation/Trifluoroacetylation of Quinolines by Their Reaction with  $\text{CF}_3$ -ynones and Base-Induced Rearrangement. *J. Org. Chem.* **2020**, *85*, 9993-10006.
8. Shee, S.; Ganguli, K.; Jana, K.; Kundu, S., Cobalt complex catalyzed atom-economical synthesis of quinoxaline, quinoline and 2-alkylaminoquinoline derivatives. *Chem. Commun.* **2018**, *54*, 6883-6886.
9. Shang, X.-F.; Morris-Natschke, S. L.; Yang, G.-Z.; Liu, Y.-Q.; Guo, X.; Xu, X.-S.; Goto, M.; Li, J.-C.; Zhang, J.-Y.; Lee, K.-H., Biologically active quinoline and quinazoline alkaloids part II. *Medicinal Research Reviews* **2018**, *38*, 1614-1660.
10. Das, K.; Mondal, A.; Srimani, D., Phosphine free Mn-complex catalysed dehydrogenative C–C and C–heteroatom bond formation: a sustainable approach to synthesize quinoxaline, pyrazine, benzothiazole and quinoline derivatives. *Chem. Commun.* **2018**, *54*, 10582-10585.
11. Maji, M.; Chakrabarti, K.; Panja, D.; Kundu, S., Sustainable synthesis of N-heterocycles in water using alcohols following the double dehydrogenation strategy. *J. Catal.* **2019**, *373*, 93-102.
12. Wei, D.; Dorcet, V.; Darcel, C.; Sortais, J.-B., Synthesis of Quinolines Through Acceptorless Dehydrogenative Coupling Catalyzed by Rhenium PN(H)P Complexes. *ChemSusChem* **2019**, *12*, 3078-3082.

13. Parua, S.; Sikari, R.; Sinha, S.; Das, S.; Chakraborty, G.; Paul, N. D., A nickel catalyzed acceptorless dehydrogenative approach to quinolines. *Org. Biomol. Chem.* **2018**, *16*, 274-284.
14. Maji, A.; Singh, A.; Singh, N.; Ghosh, K., Efficient Organoruthenium Catalysts for  $\alpha$ -Alkylation of Ketones and Amide with Alcohols: Synthesis of Quinolines via Hydrogen Borrowing Strategy and their Mechanistic Studies. *ChemCatChem* **2020**, *12*, 3108-3125.
15. Mondal, R.; Chakraborty, G.; Guin, A. K.; Pal, S.; Paul, N. D., Iron catalyzed metal-ligand cooperative approaches towards sustainable synthesis of quinolines and quinazolin-4(3H)-ones. *Tetrahedron* **2021**, *100*, 132479.
16. Das, S.; Maiti, D.; De Sarkar, S., Synthesis of Polysubstituted Quinolines from  $\alpha$ -2-Aminoaryl Alcohols Via Nickel-Catalyzed Dehydrogenative Coupling. *J. Org. Chem.* **2018**, *83*, 2309-2316.
17. Xu, Z.; Chen, H.; Deng, G.-J.; Huang, H., Copper-Catalyzed Formal [3 + 3] Annulations of Arylketoximes and o-Fluorobenzaldehydes: An Entry to Quinoline Compounds. *Org. Lett.* **2021**, *23*, 936-942.
18. Jida, M.; Deprez, B., Friedländer synthesis of polysubstituted quinolines and naphthyridines promoted by propylphosphonic anhydride (T3P<sup>®</sup>) under mild conditions. *New J. Chem.* **2012**, *36*, 869-873.
19. Kretzschmar, M.; Hodík, T.; Schneider, C., Brønsted Acid Catalyzed Addition of Enamides to ortho-Quinone Methide Imines—An Efficient and Highly Enantioselective Synthesis of Chiral Tetrahydroacridines. *Angew. Chem. Int. Ed.* **2016**, *55*, 9788-9792.
